# Supplementary material for: Temporal-dependent effects of rainfall characteristics on inter-/intra-event stemflow variability in two xerophytic shrubs
Source: Copernicus journal article supplement (doi:10.5194/hess-2019-254), 2019-05-28
Supplement: Supplementary file [file hess-2019-254-AC2-supplement.pdf]

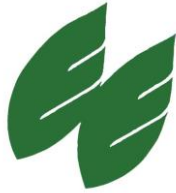

中国科学院生态环境研究中心  
**Research Center for Eco-Environmental Science**  
**Chinese Academy of Sciences (CAS)**

北京市海淀区双清路 18 号 邮编: 100085 Website: www.rcees.ac.cn  
#18 Shuangqing Road, Haidian District, Beijing 100085, P. R. China  
Tel: 0086-10-62911239 Email: gygao@rcees.ac.cn

---

August 19, 2019

Memorandum

To: Prof. Lixin Wang, Editor of *Hydrology and Earth System Science*

Subject: **Revised manuscript of hess-2019-254**

Dear Prof. Wang,

We have substantially revised our manuscript entitled as “*Temporal-dependent effects of rainfall characteristics on inter-/intra-event branch-scaled stemflow variability in two xerophytic shrubs*” after considering all the comments of Prof. David Dunkerley and another two anonymous reviewers, which are of great help to improve this manuscript.

The following are the point-to-point response to all these comments, including (1) Response to the anonymous Reviewer #1, (2) Response to Reviewer #2 (Prof. David Dunkerley), (3) Response to the anonymous Reviewer #3, (4) The revised manuscript, and (5) The revised manuscript with marks in comparison with the previous version, respectively.

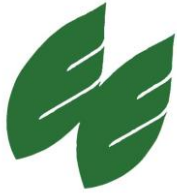

中国科学院生态环境研究中心  
Research Center for Eco-Environmental Science  
Chinese Academy of Sciences (CAS)

北京市海淀区双清路 18 号 邮编: 100085 Website: www.rcees.ac.cn  
#18 Shuangqing Road, Haidian District, Beijing 100085, P. R. China  
Tel: 0086-10-62911239 Email: gygao@rcees.ac.cn

---

## Response to Reviewer #1

**General Comments:** The paper by Yuan et al mainly aimed to characterize the inter-/intra-event stemflow dynamics of two xerophytic shrubs and to quantify their relationships with the corresponding inter-/intra-event rainfall characteristics. They concluded that rainfall characteristics had temporal-dependent influences on corresponding stemflow variables.

From my point of view, the study has potential to make a contribution to a better understanding of, in particular, the intra-storm stemflow processes and the underlying mechanisms governing its dynamics. The experimental design and data analysis are generally acceptable, while clarity is needed in presenting the design. The figures adequately summarize the results. I recommend this paper for publication in HESS after some moderate revisions had been addressed by the authors.

### Reply:

We appreciated the anonymous reviewer for the comments and suggestions, which were of great help to improve the overall quality of this manuscript. The manuscript had been carefully revised, and we tried best to submit a qualified manuscript as required.

**R1C2:** L 69: Change “initialed” to “initiated”.

Reply: Done (Line 73, Page 4).

**R1C3:** L 72: I would use “leafed period” instead of “leaf period”.

Reply: Done (Line 77, Page 4).

**R1C4:** Section 2.2: What is the time interval for recording rainfall and the stemflow in subsequent section? This needs to be clearly stated.

### Reply:

Sensors were installed at the meteorological station to record wind speed (Model 03002, R. M. Young Company, USA), air temperature and relative humidity (Model HMP 155, Vaisala, Finland). They were logged at 10-min intervals by a datalogger (Model CR1000, Campbell Scientific Inc., USA) (Lines 142–146, Page 7). We recorded stemflow and rainfall via the Onset® (Onset Computer Corp., USA) RG3-M tipping-bucket rain gauges (hereinafter referred to as TBRG). When the bucket (with resolution of 0.2 mm and the equivalent volume of 3.73 mL) was filled and tipped, data of stemflow or rainfall was stored at the dynamic time interval. It depended on rainfall and stemflow intensities. In general, we recorded meteorological features of WS, T and H at 10-min intervals. However, the rainfall and stemflow was recorded at dynamics intervals between neighboring tips with the fixed 0.2-mm resolution (Lines 221–222, Page 10).

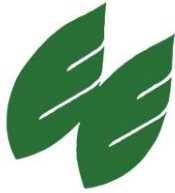

中国科学院生态环境研究中心  
Research Center for Eco-Environmental Science  
Chinese Academy of Sciences (CAS)

北京市海淀区双清路 18 号 邮编: 100085 Website: www.rcees.ac.cn  
#18 Shuangqing Road, Haidian District, Beijing 100085, P. R. China  
Tel: 0086-10-62911239 Email: gygao@rcees.ac.cn

---

**R1C5:** L 184-186: According to Table 1, stemflow data of *S. psammophila* are not available for branches with a BD of 15-18 mm rather than 18-25 mm. Please verify this.

**Reply:** The typo here of “18-25 mm” had been revised to “15-18 mm” at [Line 213, Page 10](#).

**R1C6:** Section 2.4: I miss the information about how many rain gauges the authors used in recording stemflow. Did each branch connect to a rain gauge? It seems to be the case from my view of Fig. 1, which makes a total of 14 rain gauges. Please explicitly state to avoid guessing.

**Reply:**

TBRGs had been applied in this study to automatically record stemflow volume and timing. Each TBRG connected to one experimental branches of *C. korshinskii* and *S. psammophila*. Seven branches were selected at different BD categories for each species. Therefore, we had installed 14 TBRGs for stemflow measuring in this study. It had been clearly described at the revised manuscript ([Lines 220, Page 10](#)).

**R1C7:** L 203: I would change "base area" to "orifice area", which is a more accurate terminology for rain gauge.

**Reply:** Done ([Line 234, Page 11](#)).

**R1C8:** L 200-210: As for mL of SFV, it should be calculated as:  $SFV = [\text{mm (branch stemflow recorded by tipping-bucket rain gauges)} / 10] \text{ cm}^2$  (orifice area of a rain gauge). I think the authors missed a 10. Therefore, for the calculation of stemflow volume and stemflow intensity, I suggest that authors provide the corresponding mathematical equations; it would be concise and easier for readers to follow.

**Reply:**

Thank you for commenting on the poorly explained data processing at this manuscript. At the previous version of this manuscript, we just gave the factors for calculating stemflow volume (SFV, mL), i.e., stemflow depth recorded by TBRG ( $SF_{RG}$ , mm) and orifice area (186.3  $\text{cm}^2$ ). The equation for SFV computation had been described at the revised manuscript (Equation 10) ([Lines 235, Page 11](#)). Besides, the definitions and calculations of stemflow intensity (Equation 11–13, [Lines 246–248, Page 12](#)), time lags to rains ([Lines 252–257, Page 12](#)) and other meteorological features (Equation 1–9, [Lines 158–160, Line 164, Lines 184–188, Pages 8–9](#)) had also been clearly described at section 2.2 *Meteorological measurements and calculations* and Section 2.4 *Stemflow measurements and calculations*.

**R1C9:** L 211-215: According to the calculation of TLG, TLM, and TLE, these variables can have either negative or positive values. I encourage the authors to clarify here their respective meanings, i.e., what positive values are suggesting and what negative values are suggesting. Again, it would be easier for readers to better understand their following results.

**Reply:**



中国科学院生态环境研究中心  
Research Center for Eco-Environmental Science  
Chinese Academy of Sciences (CAS)

北京市海淀区双清路 18 号 邮编: 100085 Website: www.rcees.ac.cn  
#18 Shuangqing Road, Haidian District, Beijing 100085, P. R. China  
Tel: 0086-10-62911239 Email: gygao@rcees.ac.cn

---

Thank you for this comment. Associated with the results in this study, the meanings of positive and negative values of TLG, TLE and TLM had been described at the *Section 3.2 Stemflow volume, intensity, funnelling ratio and temporal dynamics* at the revised manuscript. During the 54 events, no negative values were observed for TLG and TLM but TLE. It indicated that stemflow generally initiated and maximized after rains started for both species. However, stemflow might be ended before (negative TLE) and after (positive TLE) rains ceased. (Lines 326–329, Page 15).

**R1C10:** L 258-259: It would be more straightforward to add a row in Table 2 showing how many rainfall events occurred for each category (Event A to C, and others).

**Reply:** Done (Line 808, Page 40).

**R1C11:** L 291-298: If it is possible, I would also expect to see some results about the differences of stemflow variables varied among BD categories.

**Reply:**

Thank you for this comment. As suggested, we compared SFI and FR at different BD categories of *C. korshinskii* and *S. psammophila*. Shown at Table 4, FR of *C. korshinskii* decreased from 163.7 at the 5–10-mm branches to 97.7 at the 18–25-mm branches. The decreasing trend of FR were also noted for *S. psammophila* in the range of 44.2–212.0, as branch size increased. The results were in consistence with the findings for trees and babassu palms in an open tropical rainforest in Brazil (Germer et al., 2010), in the coastal British Columbia forest with mixed species (Spencer and Meerveld, 2016), for trees (*Pinus tabuliformis* and *Armeniaca vulgaris*) and shrubs (*C. korshinskii* and *S. psammophila*) at Loess Plateau of China (Yang et al., 2019). Because funnelling ratio was calculated as the ratio between stemflow and rainfall intensities, SFI was also compared at different BD categories. It was negatively related with branch size for both species. As indicated at Equation 14–15 (Lines 264–265, Page 12), the decreasing stemflow intensity with branch size might partly explained the negative relations between funnelling ratio and BD.

However, we did not compare all the stemflow variables at different BD categories. Because of the high expense of TBRGs (Turner et al., 2019), no more than two branches were selected for stemflow recording at each BD category. The results were much more convincing to analyze the average stemflow variables among BD categories, and compared them at



中国科学院生态环境研究中心  
**Research Center for Eco-Environmental Science**  
**Chinese Academy of Sciences (CAS)**

北京市海淀区双清路 18 号 邮编: 100085 Website: www.rcees.ac.cn  
#18 Shuangqing Road, Haidian District, Beijing 100085, P. R. China  
Tel: 0086-10-62911239 Email: gygao@rcees.ac.cn

---

different rainfall amount categories with enough events for meeting the statistical significance.

**RIC12:** Section 4.1: I would like to discuss with the authors about the use and importance of stemflow intensity and RSFI. I admit that stemflow intensity would be a good variable to show the dynamics of intra-event stemflow, while I am not convinced by authors about the importance of comparing the absolute values of stemflow intensity versus rainfall intensity (also demonstrated in L26-30 of Abstract). Their study is based on monitoring branch stemflow, and branch stemflow intensity was a bit higher than rainfall intensity in their study. However, in terms of stemflow's ecological and hydrological importance such as in providing additional soil water and sustaining vegetation growth, we pay more attention to the whole tree/shrub (rather than a single branch). From my understanding this variable is highly dependent on the size of a shrub/tree, because a larger shrub/tree (normally has larger basal diameter or canopy area) would generate substantially higher volume of stemflow, therefore stemflow intensity calculated based on collecting from individual trees/shrubs would be far greater than rainfall intensity, as examples please see Fig. 3 in cayuela et al. (2018, Journal of Hydrology) or Fig. 7 in Germer et al. (2010, Journal of Hydrology). Stemflow and rainfall differs in their paths entering into rain gauges; the orifice area makes sense for rainfall because this area is precisely where rainfall falling into and rainfall depth is then normalized, while stemflow is part of intercepted rainfall by the canopy and then comes down stems, which indicates that infiltrating soil area of stemflow is quite different than that of a rain gauge (i.e., orifice area). Therefore this variable may be prone to underestimate stemflow's eco-hydrological role for small shrubs, as such, in terms of ecological importance this variable seems to be less appropriate to be used for inter-specific comparison or even intra-specific comparison of varying sizes. Moreover, the authors were also recommending a future combination use of funnelling ratio and RSFI in stemflow studies. While I agree with the authors that RSFI is helpful in better understanding of the intra-event convergence effects, funnelling ratio assumes trunk/stem basal area is the true area that stemflow is delivered to the soil, whereas RSFI here is based on stemflow intensity which I have discussed above. RSFI may also be prone to underestimate stemflow's eco-hydrological role for small trees/shrubs while overestimate that of big trees/shrubs. I encourage authors to discuss both the advantages and limitations of stemflow intensity and



RSFI as well as their application.

**Reply:**

Thank you for commenting on the calculation and importance of stemflow intensity and RSFI at this manuscript. It indeed underestimated the eco-hydrological significance of stemflow by ignoring its receiving area of branch base as suggested. Therefore, we had revised the calculation of stemflow intensity on basis of basal area, and introduced funnelling ratio to assess the convergence effect of stemflow at the revised manuscript.

Please see the detailed explanations as below.

(1) Stemflow intensity had been re-computed on basis of branch basal area, and quantitatively connected to funneling ratio.

The RG3-M TBRGs had been applied to record stemflow in this study. Stemflow depth ( $SF_{RG}$ , mm) could be directly computed with tip amounts and tip resolution of 0.2 mm. Similar with the interpretation for rainfall recording, the 0.2-mm per tip represented 200 mL water depositing on the 1-m<sup>2</sup> ground surface. Based at the same receiving areas, we calculated stemflow intensity as the ratio between  $SF_{RG}$  and rainfall duration at the previous manuscript. However, it underestimated the eco-hydrological significance of stemflow by ignoring the limited area of trunk/branch base, over which stemflow was received. As suggested at this comment, stemflow intensity should associate with the area over which the equivalent stemflow depth is evaluated. Therefore, we re-calculated stemflow intensity and followed the definition of stemflow volume per basal area per unit time (Herwitz, 1986; Spencer and Meerveld, 2016). In this study, we calculated stemflow intensity at different time intervals, including the event base (SFI), the 10-min ( $SFI_{10}$ ) and the dynamic intervals between neighboring tips of TBRG ( $SFI_i$ ) (Equation 11–13) (Line 246–248, Page 12). Furthermore, we established the quantitative connections of stemflow intensity with funnelling ratio for the first time as indicated at Equation 14–15 (Lines 264–265, Page 12). RSFI had been deleted at the revised manuscript. By replacing the event-based volume of rainfall and stemflow with their intensities at the traditional expression (Herwitz, 1986), the new method enabled funnelling ratio to be computed at high temporal resolutions within event.

(2) Stemflow variables and the meteorological influences were analyzed at branch scale.

*C. korshinskii* and *S. psammophila* are modular organisms with multiple branches. Each



中国科学院生态环境研究中心  
Research Center for Eco-Environmental Science  
Chinese Academy of Sciences (CAS)

北京市海淀区双清路 18 号 邮编: 100085 Website: www.rcees.ac.cn  
#18 Shuangqing Road, Haidian District, Beijing 100085, P. R. China  
Tel: 0086-10-62911239 Email: gygao@rcees.ac.cn

---

branch of them lives as independent individual which seeks its own survival goals and compete with each other for light and water (Firn, 2004; Allaby, 2010). They provide ideal experimental objects to measure the branch stemflow volume and production processes. By introducing branch basal diameter (BD, mm) as intermediate variable, stemflow volume, intensity and funnelling ratio could be upscaled from branches to shrubs (Yuan et al., 2016; 2017). Therefore, the study on branch stemflow variables was conducive to explain the meteorological influences on stemflow at shrub scale particularly for the modular organisms. To guarantee the representativeness of experimental shrubs and branches, the thorough plot investigation had been carried out. Please see **Point (3) at Reply to R2C3** for describing the determination of standard shrubs at the plots of *C. korshinskii* and *S. psammophila*, and see **Point (4) at Reply to R2C2** for explaining the determination of standard branches of the two shrubs. To address the branch scaled measurements of stemflow, the title had been revised as “Temporal-dependent effects of rainfall characteristics on inter-/intra-event branch-scaled stemflow variability in two xerophytic shrubs” as suggested by Reviewers 2 and 3.

**R1C13:** L 433-437: These sentences are somewhat redundant (have been mentioned in above sections) and can be simplified or simply deleted.

**Reply:** Done.

**R1C14:** Figure 3: Data points are average values for 7 branches for each event? Since the authors selected 7 branches of varying BD for each species to measure stemflow, a relative larger difference in stemflow would be expected among branches. It would be an option to adding error bars if they won't make the figure blurring too much.

**Reply:**

Stemflow variables were averaged at seven branches of *C. korshinskii* and *S. psammophila*, respectively. Inter-event variations of the average stemflow variables during the experimental period had been shown at Figure 3. The relatively high expense of TBRGs limited the number of experimental branches that could be measured (Turner et al., 2019). However, each experimental branch was carefully selected following the strict criteria. Please see **Point (4) at Reply to R2C2** for explaining the representativeness of the selected seven branches. A total of



中国科学院生态环境研究中心  
Research Center for Eco-Environmental Science  
Chinese Academy of Sciences (CAS)

北京市海淀区双清路 18 号 邮编: 100085 Website: www.rcees.ac.cn  
#18 Shuangqing Road, Haidian District, Beijing 100085, P. R. China  
Tel: 0086-10-62911239 Email: gygao@rcees.ac.cn

---

seven branches were selected for automatic recording via TBRGs at different BD categories of each species. That was the comprehensive results by balancing the statistical significance and TBRG expenses.

To better meeting the statistical significance, we took the average value of stemflow variables at the seven branches at each species, and focused on the comparison of them among different rainfall amount categories. We just discussed the influence of rainfall characteristics in this study, and no analyses were performed to explore the influence of branch traits affecting stemflow volume and process. The variation of stemflow variables had been described as the average $\pm$ standard error (Iida et al., 2017) at Table 3 (Lines 817–824, Page 41). However, since eight stemflow variables with 54 recording points each were shown at the same figure, the error bars were not drawn at Fig.3 just to keep the intra-event variation of stemflow variables clean and tidy (Lines 835–837, Page 45).

**RIC15:** Figure 4: The unit of rainfall stemflow intensity should be  $\text{mm h}^{-1}$  rather than  $\text{m h}^{-1}$ . Also changes should be made in the legend, since both lines and points are included in this figure, it would be misleading by labelling “Lines in blue” or “Lines in red” without mentioning points. Moreover, since 7 branches for each species were selected for monitoring stemflow intra-event dynamics, I am wondering which branches for two species were demonstrated in this figure.

**Reply:**

Done. The typo unit ( $\text{m h}^{-1}$ ) had been corrected to  $\text{mm h}^{-1}$ , and the misleading legends had been revised, and the branch size of *C. korshinskii* and *S. psammophila* had been added at Fig.4 (Line 837–840, Page 46).

**Reference:**

- Allaby, M.: A Dictionary of Ecology, 4th Edn., Oxford University Press, Oxford, 2010.  
Firn, R.: Plant Intelligence: an Alternative Point of View, Ann. Bot., 93, 345–351, 2004.  
Germer, S., Werther, L. and Elsenbeer, H.: Have we underestimated stemflow? Lessons from an open tropical rainforest, J. Hydrol., 395, 169–179, <https://doi.org/10.1016/j.jhydrol.2010.10.022>, 2010.  
Herwitz, S.R.: Infiltration-excess caused by Stemflow in a cyclone-prone tropical rainforest, Earth Surf. Proc. Land, 11, 401–412, <https://doi.org/10.1002/esp.3290110406>, 1986.





中国科学院生态环境研究中心

Research Center for Eco-Environmental Science  
Chinese Academy of Sciences (CAS)

北京市海淀区双清路 18 号 邮编: 100085 Website: www.rcees.ac.cn  
#18 Shuangqing Road, Haidian District, Beijing 100085, P. R. China  
Tel: 0086-10-62911239 Email: gygao@rcees.ac.cn

---

- Iida, S., Levia, D.F., Shimizu, A., Shimizu, T., Tamai, K., Nobuhiro, T., Kabeya, N., Noguchi, S., Sawano, S. and Araki, M.: Intrastorm scale rainfall interception dynamics in a mature coniferous forest stand, *J. Hydrol.*, 548, 770–783, <https://doi.org/10.1016/j.jhydrol.2017.03.009>, 2017.
- Spencer, S. A. and van Meerveld, H. J.: Double funnelling in a mature coastal British Columbia forest: spatial patterns of stemflow after infiltration, *Hydrol. Process.*, 30, 4185–4201, <https://doi.org/10.1002/hyp.10936>, 2016.
- Turner, B., Hill, D.J., Carlyle-Moses, D.E. and Rahman, M.: Low-cost, high-resolution stemflow sensing, *J. Hydrol.*, 570, 62–68, <https://doi.org/10.1016/j.jhydrol.2018.12.072>, 2019.
- Yang, X.L., Shao, M.A. and Wei, X.H.: Stemflow production differ significantly among tree and shrub species on the Chinese Loess Plateau, *J. Hydrol.*, 568, 427–436, <https://doi.org/10.1016/j.jhydrol.2018.11.008>, 2019.
- Yuan, C., Gao, G.Y. and Fu, B.J.: Stemflow of a xerophytic shrub (*Salix psammophila*) in northern China: Implication for beneficial branch architecture to produce stemflow, *J. Hydrol.*, 539, 577–588, <https://doi.org/10.1016/j.jhydrol.2016.05.055>, 2016.
- Yuan, C., Gao, G.Y. and Fu, B.J.: Comparisons of stemflow and its bio-/abiotic influential factors between two xerophytic shrub species, *Hydrol. Earth Syst. Sci.*, 21, 1421–1438, <https://doi.org/10.5194/hess-21-1421-2017>, 2017.

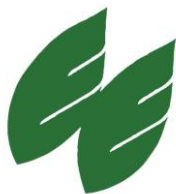

中国科学院生态环境研究中心  
**Research Center for Eco-Environmental Science**  
**Chinese Academy of Sciences (CAS)**

北京市海淀区双清路 18 号 邮编: 100085 Website: www.rcees.ac.cn  
#18 Shuangqing Road, Haidian District, Beijing 100085, P. R. China  
Tel: 0086-10-62911239 Email: gygao@rcees.ac.cn

---

## Response to Reviewer #2: Prof. Dunkerley

**General Comments:** The authors report on a detailed study of stemflow in two dryland shrub species, and its relationship with rainfall properties. The data come from field observations of selected branches that were equipped with stemflow collecting collars, and exposed to a number of natural rainfall events. Seven branches were instrumented for each of the two shrub species. The stemflow was recorded by directing the flow into tipping-bucket rain gauges having a 0.2 mm sensitivity.

Although the work appears to be generally thorough, there are some significant issues with it that I consider require clarification before the work could be accepted for publication.

### Reply:

We would like to extend our sincere gratitude to Prof. Dunkerley for these constructive comments and suggestions. They were of great help to improve this manuscript. We have carefully revised this manuscript as required.

**R2C1:** The authors are concerned with the relative timing of rainfall and of the resulting stemflow. The difficulty here is that the relative timing is affected by the size of the collecting areas that contribute either rainfall or stemflow to the measuring gauges. The canopy of *S. psammophila* for instance is reported as 21.4 m<sup>2</sup> (line 170), whilst the collecting area of the pluviography TBRG in the open is just 0.018 m<sup>2</sup>. Thus the canopy area of the shrub is more than 1,000 times larger. Therefore, the tiny tipping bucket (capacity about 3.65 mL, by my estimation) can potentially be filled more rapidly by stemflow than by rainfall in the open. In this way, the time until first tip (regarded by the authors as the onset of stemflow) probably occurs closer to the onset of rainfall as a function of canopy area and its effect in reducing the bucket filling time.

Therefore, among the seven instrumented branches, the timing of stemflow initiation should vary, and it might be possible to relate this to the plant morphology. However, the authors do not report the canopy collecting area for the 7 branches that they monitored for each of the two shrub species. Therefore, calculations of the kind just sketched cannot be made nor the results evaluated properly. This imposes uncertainty in the interpretation of the stemflow timing data. The ideal, of course, would be for the collecting area of foliage and branch to be as close as possible to the collecting area of the open-field rain gauge.

Indeed, the manuscript lacks any detail of the foliar area on the branches that were monitored for stemflow. For instance, leaf area and leaf wettability are not mentioned or reported. Likewise, there are no data on the shrub canopies as a whole, such as leaf area index (LAI) or canopy gap fraction. The lack of such information again makes the results somewhat difficult to interpret or to compare with results from other taxa and environments.



中国科学院生态环境研究中心

Research Center for Eco-Environmental Science  
Chinese Academy of Sciences (CAS)

北京市海淀区双清路 18 号 邮编: 100085 Website: www.rcees.ac.cn  
#18 Shuangqing Road, Haidian District, Beijing 100085, P. R. China  
Tel: 0086-10-62911239 Email: gygao@rcees.ac.cn

---

## Reply:

Thank you for this comment. As suggested by Prof. Dunkerley, the initiation of rainfall and stemflow, and the time intervals between them were indeed strongly affected by the corresponding areas to collect them. Therefore, we had carefully discussed the influence of interception area affecting stemflow volume, depth, fraction and funnelling ratio at 53 branches of *C. korshinskii* and 98 branches of *S. psammophila* at Yuan et al. (2016; 2017), including the leaf area of individual branches, branch size, the specific surface area of canopy representing by leaves and stems at both the leafed and leafless states, respectively. By installing TBRGs at 7 branches of each species, this study mainly concentrated the branch-scaled inter-/intra-event stemflow variabilities and the influence of rainfall characteristics affecting them. The influence of leaf area index (LAI) and crown area were not discussed at the shrub scale.

The reasons were detailedly explained as below.

### (1) Stemflow variables and meteorological influences were analyzed at branch scale.

*C. korshinskii* and *S. psammophila* are modular organisms with multiple branches. Each branch of them lives as independent individual which seeks its own survival goals and compete with each other for light and water (Firn, 2004; Allaby, 2010). They provide ideal experimental objects to measure the branch stemflow volume and production processes, which could be upscaled to stemflow variables of individual shrubs (Yuan et al., 2016; 2017). The branch-scaled study of stemflow process was conducive to better understand stemflow production at shrub scale particularly for the modular organisms. Therefore, this study focused on the branch-scaled stemflow volume, intensity, temporal dynamics and funnelling ratio of the two species, and analyzed the influences of rainfall characteristics affecting them.

### (2) Stemflow variables were averaged at seven different-sized branches of each species.

Seven branches were selected to automatically record stemflow via TBRGs at different BD categories of *C. korshinskii* and *S. psammophila*, respectively. The relatively high expense of TBRGs limited the number of experimental branches that could be measured (Turner et al., 2019). However, each experimental branch was carefully selected following the strict criteria as stated at [Point \(3\) of Reply to R2C3](#) and [Point \(4\) of Reply to R2C2](#). Thus, we tried best to guarantee the selected experimental branches to represent the experimental shrubs, and the selected shrubs to represent the *C. korshinskii* and *S. psammophila* plots in this study. That was the comprehensive results by balancing the statistical significance and TBRG expenses.

Average stemflow variables were took at these seven branches to present the branch stemflow variables of the representative shrubs at *C. korshinskii* and *S. psammophila* plots. We mainly compared them at different rainfall amount (RA) categories, and discussed the influence of rainfall characteristics affecting them. Therefore, the variances of branch morphologies within species were not relevant to the average branch-scaled stemflow variables. However, they had been described as important background information at Table 1. The canopy traits were also stated at [Section 2.3 \(Lines 197–199, Page 9\)](#).

### (3) Recording stemflow process with the tipping bucket rain gauges had been justified.

Tipping bucket rain gauges (TBRGs) provided the intra-event monitoring of stemflow and



中国科学院生态环境研究中心

Research Center for Eco-Environmental Science  
Chinese Academy of Sciences (CAS)

北京市海淀区双清路 18 号 邮编: 100085 Website: www.rcees.ac.cn  
#18 Shuangqing Road, Haidian District, Beijing 100085, P. R. China  
Tel: 0086-10-62911239 Email: gygao@rcees.ac.cn

---

had been widely applied (Iida et al., 2012), although they underestimated the inflow water with systematic mechanical errors (Turner et al., 2019). The bigger bucket volume might bring the larger underestimation (Iida et al., 2012). Therefore, RG3-M rain gauges were used in this study with the relatively smaller bucket volume of 0.2 mm (the equivalent volume of 3.73 mL, email-confirmed by the Onset company). Besides, we corrected the TBRG recording via the regressions with manual measurements as per Equation 4 to further mitigate its underestimation (Line 164, Page 8).

TBRGs offered the ability to collect the volume and timing of inflow water throughout an event (Turner et al., 2019). When the bucket was filled by rains and tipped, it was recorded as the beginning of incident rains. Comparatively, stemflow started in a much more complicated manner. Because it could not be initiated until the canopy was saturated. The larger branch leaf area could help to initiate stemflow earlier for trapping more rains, but might also result in a later generation by consuming more rains to wet canopy. Furthermore, stemflow generation also affected by the traveling time from canopy down to branch base, which was strongly affected by the bark roughness. Therefore, compared with the simply positive relation between TBRG orifice area and rains initiation in the clearings, the larger leaf area to intercept rains could not guarantee a quick start of stemflow. Our results indicated *C. korshinskii* and *S. psammophila* averagely initiated stemflow 66.2 and 54.8 min later than rains began during the 2014–2015 rainy seasons. Time lags of stemflow generation to rains was also supported by Germer (2010) and Cayuela et al. (2018). In general, TBRG was not perfect to precisely record stemflow timing, but might be the plausible devices to record stemflow process by far.

**R2C2:** Data processing is poorly explained. Stemflow intensity, given in mm h<sup>-1</sup>, requires that the volume of water delivered to the TBRG used to record stemflow (recorded in mL per bucket tip) must be associated with the area over which the equivalent stemflow depth is evaluated. I could not see this explained anywhere in the manuscript, and it needs to be made clear. If it was the cross-sectional area of the branch being monitored (typically about 3 cm<sup>2</sup> by my rough estimation) then this needs to be set out in the manuscript. If the authors did use basal branch cross-sectional area, then of course the stemflow intensity can easily exceed the rainfall intensity, as a function of the very small area over which the stemflow is recorded as arriving - far smaller than the collecting area of the rainfall pluviograph. If this area were to be doubled, then the stemflow intensity would be halved (and so on). Therefore, the area used by the authors in their calculation needs to be stated (and justified by some relationship to plant water availability).

Data processing is also poorly explained in terms of the data on stemflow volume presented by the authors (e.g. in Table 3). Are the stemflow volumes reported there, and discussed at many places in the paper, the sum of the stemflow on the 7 monitored branches, or the arithmetic mean of the stemflow from the 7 branches, or are the figures scaled-up to estimate the stemflow delivered by the entire test shrub? (The test shrubs had a total of 180 and 261 branches (line 173) only 7 of which were monitored for each shrub species (amounting to a sample of 4% and



中国科学院生态环境研究中心  
Research Center for Eco-Environmental Science  
Chinese Academy of Sciences (CAS)

北京市海淀区双清路 18 号 邮编: 100085 Website: www.rcees.ac.cn  
#18 Shuangqing Road, Haidian District, Beijing 100085, P. R. China  
Tel: 0086-10-62911239 Email: gygao@rcees.ac.cn

---

2.6% of the branches, the adequacy of which is not discussed by the authors). Whatever the authors did, it is not made clear and this needs to be corrected. Especially in relation to stemflow, all relevant parameters used in data processing must be set out clearly and systematically.

Without knowing the details of the calculation procedure, the relative intensity of the stemflow and the open-field rainfalls are difficult to interpret. No formulae are presented by the authors that would allow this to be checked. My own feeling is that the stemflow flux would be a more useful figure - that is, the flow rate delivered to the base of the branch, expressed for instance in mL/minute or L/hour. If this is accompanied by a clearly-stated area over which the flow is tallied, then a stemflow intensity can be calculated.

**Reply:**

Thank you for this comment. The poorly-explained data processing has been carefully revised. We have detailedly described the definitions and calculations of stemflow volume, intensity, time lag to rains and other meteorological features at the revised manuscript. The representativeness of the selected was stated as below.

(1) Stemflow intensity has been computed following the definition as the stemflow volume per basal area per unit of time.

The RG3-M TBRGs had been applied to record stemflow in this study. Stemflow depth ( $SF_{RG}$ , mm) was computed with tip amounts within event by multiplying tip resolution of 0.2 mm. Similar with the interpretation for rainfall recording, the 0.2-mm per tip represented 200 mL water depositing on the 1-m<sup>2</sup> ground surface. Based at the same receiving areas, we calculated stemflow intensity as the ratio between  $SF_{RG}$  and rainfall duration at the previous manuscript. However, it underestimated the eco-hydrological significance of stemflow by ignoring the limited area of trunk/branch base, over which stemflow was truly received. Therefore, following the definition of stemflow volume per basal area per unit time (Herwitz, 1986; Spencer and Meerveld, 2016), we re-computed stemflow intensity with the branch base area at different temporal scales, including the event ( $SFI$ ), the 10-min ( $SFI_{10}$ ) and the intervals between neighboring tips of TBRG ( $SFI_i$ ) (Equation 11–13 at [Lines 246–248, Page 12](#)). Furthermore, we established the quantitative connections of stemflow intensity with funnelling ratio for the first time (Equation 14 at [Line 264, Page 12](#)). By replacing the event-based volume of rainfall and stemflow with their intensities at the traditional expression, this new method enabled to calculate funnelling ratio at both inter-/intra-event scales ([Lines 554–555, Page 26](#)).

(2) The detailed definition and calculation had been described for stemflow variables and rainfall characteristics.

The definitions and calculations had been described for stemflow volume ( $SFV$ , mL) (Equation 10 at [Lines 235, Page 11](#)), stemflow duration ( $SFD$ , h), time lags stemflow generation ( $TLG$ , min), maximization ( $TLM$ , min) and ending ( $TLE$ , min) at [Lines 249–257, Page 12](#), the regression for rectifying the TBRG recordings with manual measurements (Equation 4) at [Lines 164, Page 8](#), evaporation coefficient ( $E$ , unitless) (Equation 1–3) at [Lines 158–160, Page 8](#), the allometric equations for estimating leaf area of branches at *C. korshinskii* and *S. psammophila* at [Lines 215–218, Page 10](#).



中国科学院生态环境研究中心

Research Center for Eco-Environmental Science  
Chinese Academy of Sciences (CAS)

北京市海淀区双清路 18 号 邮编: 100085 Website: www.rcees.ac.cn  
#18 Shuangqing Road, Haidian District, Beijing 100085, P. R. China  
Tel: 0086-10-62911239 Email: gygao@rcees.ac.cn

(3) Stemflow variables had been averaged at different BD categories to analyze the most influential rainfall characteristics affecting them.

Stemflow variables were averaged at different-sized branches to present the branch-scaled stemflow variables of the representative shrubs at *C. korshinskii* and *S. psammophila* plots. We carefully checked the results of stemflow variables, and listed the average values of seven branches during rainfall events with different intensity peak amounts at Table 3 (Lines 817–824, Page 41). Please see the detailed description at Point (2) of Reply to R2C1.

(4) Seven representative branches were selected for stemflow recording at each species.

This study selected 4 shrubs for measuring stemflow and 1 shrub for establishing allometric equations of biomass and leaf areas at each species (Yuan et al., 2016; 2017). Please see Point (3) at Reply to R2C3 for a detailed description of the representativeness of selected experimental shrubs. The morphological features had been measured for all the 180 and 261 branches at these 5 shrubs of *C. korshinskii* and *S. psammophila*, respectively, thus to determining the standard branches for stemflow recording in this study. BD categories were grouped to guarantee the minimum branch amount at each category for meeting the statistical significance. The  $\leq 5$ -mm branches were not included in stemflow measurements, because they were too weak to bear the fossil collars for trapping stemflow. Considering the high meteorological sensitivity of stemflow temporal dynamics, we tried best to select the experimental branches at the same shrub, which were most likely exposed to the similar rainfall characteristics. Moreover, the qualified branches should have the outlayer-of-canopy positions, no intercrossing with neighboring ones and no turning point in height from branch tip to base (Lines 209–210, Page 10). Therefore, apart from the  $\leq 5$ -mm branches at both species, the  $>25$ -mm branches at *C. korshinskii* for not enough qualified individuals, and 15–18-mm branches at *S. psammophila* for TBRG malfunctioning, there are averagely 28 and 41 branches available for stemflow recording per shrub of *C. korshinskii* and *S. psammophila*, respectively (Table R2-1 as below). Finally, 7 branches were selected at each species, which took 25.0% and 17.1% of the available ones per shrub at *C. korshinskii* and *S. psammophila*, respectively. Additionally, the high expense of TBRG was an important reason to limit the amount of experimental shrub and branch for automatic recording of stemflow (Turner et al., 2019).

**Table R2-1.** Branch morphological features of the experimental shrubs of *C. korshinskii* and *S. psammophila*.

| BD categories | <i>C. korshinskii</i> |         |        |    | <i>S. psammophila</i> |         |        |    |
|---------------|-----------------------|---------|--------|----|-----------------------|---------|--------|----|
|               | BD (mm)               | BL (cm) | BA (°) | BN | BD (mm)               | BL (cm) | BA (°) | BN |
| $\leq 5$      | 4.1                   | 90.4    | 64.1   | 40 | 4.8                   | 166     | 66     | 2  |
| 5–10          | 7.3                   | 124.9   | 61.8   | 82 | 8.0                   | 204     | 64     | 53 |
| 10–15         | 12.5                  | 161.1   | 51.7   | 36 | 12.9                  | 253     | 58     | 82 |
| 15–18         | 16.3                  | 170.6   | 48.7   | 13 | 16.5                  | 280     | 52     | 56 |
| 18–25         | 19.3                  | 192.3   | 51.3   | 9  | 20.3                  | 302     | 50     | 59 |
| $>25$         | NA                    | NA      | NA     | NA | 28.7                  | 366     | 50     | 9  |



中国科学院生态环境研究中心  
Research Center for Eco-Environmental Science  
Chinese Academy of Sciences (CAS)

北京市海淀区双清路 18 号 邮编: 100085 Website: www.rcees.ac.cn  
#18 Shuangqing Road, Haidian District, Beijing 100085, P. R. China  
Tel: 0086-10-62911239 Email: gygao@rcees.ac.cn

---

Note: BD, BL, BA and BN are the basal diameter, length, angle and number of branches.

**R2C3:** In summary, what I find to be missing from the manuscript includes

- some discussion of why 7 stems were studied and whether this is a sufficient sample
- some consideration of the filling time of the buckets in the tipping-bucket gauges used for rainfall and stemflow measurement, and the effect of this on the lag time before the start of stemflow (and the cessation of stemflow after rain ends)
- more detail on the shrubs - including the variability of canopy size etc across the population from which the two sample shrubs were drawn, and some information on leaf area and wettability, if available
- a proper accounting of how stemflow flux was calculated and how the area over which the intensity was scaled was selected.

**Reply:**

- (1) Please see **Point (4) at Reply to R2C2** and **Point (3) at Reply to R2C3** for explaining the representativeness of selected 7 branches and 4 shrubs for stemflow recording, respectively.
- (2) Although TBRGs offered the ability to collect stemflow production at high temporal resolution and time lags to rain, they suffered from systematic errors owing to the rate of water delivery to tip buckets (Turner et al., 2019). The TBRGs missed the records of inflow water during tipping intervals, and they consumed water to wet buckets at the beginning (Groisman and Legates, 1994). The calibration was needed to rectify the volume recordings via regressions with the manual measurement results. However, it was difficult for rectifying the temporal data currently. Therefore, applying the TBRG with relative high accuracy was necessary. Iida et al. (2012) reported that the tipping time increased with the bucket volume by comparing different models of TBRG, including the RG3-M ( $3.73 \pm 0.01$  mL), OW-34 ( $15.7 \pm 0.3$  mL), UIZ-TB20 ( $198.3 \pm 3.3$  mL), TXQ-200 ( $188.7 \pm 10.3$  mL) and TXQ-400 ( $403.9 \pm 6.9$  mL). We chose RG3-M with the small bucket volume of 3.73 mL to mitigate the underestimation in this study. Please see **Point (3) at Reply to R2C1** to justify the feasibility of applying TBRGs.
- (3) The plot investigations had been carried out at April of 2014 for the 20-year-old *C. korshinskii* and *S. psammophila*. For *C. korshinskii*, three subplots with the size of 5 m×5 m had been selected along the plot diagonal, including subplot A (5 shrubs) and C (6 shrubs) at the ends and subplot B (6 shrubs) at the middle. As indicated at **Table R2-2 as below**, the average canopy height and area were  $1.9 \pm 0.1$  m and  $4.8 \pm 0.6$  m<sup>2</sup>, respectively. Because the runoff and sediment plots had already been constructed at the center of *S. psammophila* plot (**Fig. R2-1 as below**), we selected the subplot (13 shrubs) at northeastern part with the size of 20 m×20 m. The average canopy height and area were  $3.5 \pm 0.2$  m and  $19.1 \pm 2.2$  m<sup>2</sup>, respectively (**Table R2-3 as below**). Thus, standard shrub could be determined to represent the two plots. Finally, five experimental shrubs of each species had been selected for stemflow measurements and allometric equation establishments of *C. korshinskii* ( $2.1 \pm 0.2$  m and  $5.1 \pm 0.3$  m<sup>2</sup>) and *S. psammophila* ( $3.5 \pm 0.2$  m and  $21.4 \pm 5.2$  m<sup>2</sup>), respectively.



中国科学院生态环境研究中心  
Research Center for Eco-Environmental Science  
Chinese Academy of Sciences (CAS)

北京市海淀区双清路 18 号 邮编: 100085 Website: www.rcees.ac.cn  
#18 Shuangqing Road, Haidian District, Beijing 100085, P. R. China  
Tel: 0086-10-62911239 Email: gygao@rcees.ac.cn

As stated at **Point (4) of Reply to R2C2**, the standard branches could be determined and seven branches were finally selected for stemflow recording. According to the allometric equations established for estimating leaf area of individual branches (LA, cm<sup>2</sup>) (Yuan et al., 2016; 2017), LA of experimental shrubs were estimated in the range of 837.7–6394.7 cm<sup>2</sup> and 626.3–7513.7 cm<sup>2</sup> at different BD categories for *C. korshinskii* and *S. psammophila*, respectively (**Table 1 at Lines 805–807, Page 39**). Rainfall intervals, the time intervals between neighboring rains (RI, h), was applied to indirectly represent the branch wettability. The drier barks could be estimated when RI was larger. The results of MCA and stepwise regression indicated that RI tightly corresponded to time lags of stemflow ending, but there was no significant quantitative relationship between them for *C. korshinskii* ( $R^2=0.005, p=0.28$ ) or *S. psammophila* ( $R^2=0.002, p=0.78$ ) (**Lines 846–847, Page 49**).

**Table R2-2.** Investigation of canopy morphology at *C. korshinskii* plot.

| Plots   | Shrubs | Canopy heights (m) | Canopy area (m <sup>2</sup> ) |
|---------|--------|--------------------|-------------------------------|
| A       | 1      | 1.7                | 4.6                           |
|         | 2      | 1.2                | 2.1                           |
|         | 3      | 1.9                | 3.7                           |
|         | 4      | 1.4                | 2.5                           |
|         | 5      | 2.0                | 5.7                           |
| B       | 6      | 1.7                | 5.5                           |
|         | 7      | 1.8                | 4.3                           |
|         | 8      | 1.8                | 3.8                           |
|         | 9      | 2.1                | 6.8                           |
|         | 10     | 2.5                | 11.6                          |
|         | 11     | 2.3                | 6.7                           |
| C       | 12     | 1.3                | 3.4                           |
|         | 13     | 1.9                | 5.9                           |
|         | 14     | 1.9                | 2.7                           |
|         | 15     | 1.8                | 2.8                           |
|         | 16     | 2.0                | 4.0                           |
|         | 17     | 2.2                | 5.5                           |
| Average |        | 1.9±0.1            | 4.8±0.6                       |

**Table R2-3.** Investigation of canopy morphology at *S. psammophila* plot.

| Shrubs | Canopy heights (m) | Canopy area (m <sup>2</sup> ) |
|--------|--------------------|-------------------------------|
| 1      | 3.8                | 24.0                          |
| 2      | 3.8                | 18.5                          |
| 3      | 3.6                | 21.8                          |
| 4      | 3.7                | 24.0                          |





中国科学院生态环境研究中心  
Research Center for Eco-Environmental Science  
Chinese Academy of Sciences (CAS)

北京市海淀区双清路 18 号 邮编: 100085 Website: www.rcees.ac.cn  
#18 Shuangqing Road, Haidian District, Beijing 100085, P. R. China  
Tel: 0086-10-62911239 Email: gygao@rcees.ac.cn

---

|         |         |          |
|---------|---------|----------|
| 5       | 3.2     | 20.6     |
| 6       | 2.6     | 13.2     |
| 7       | 2.9     | 5.8      |
| 8       | 3.3     | 25.9     |
| 9       | 3.2     | 8.3      |
| 10      | 4.4     | 22.5     |
| 11      | 4.4     | 29.7     |
| 12      | 2.9     | 7.4      |
| 13      | 3.8     | 25.7     |
| Average | 3.5±0.2 | 19.1±2.2 |

---

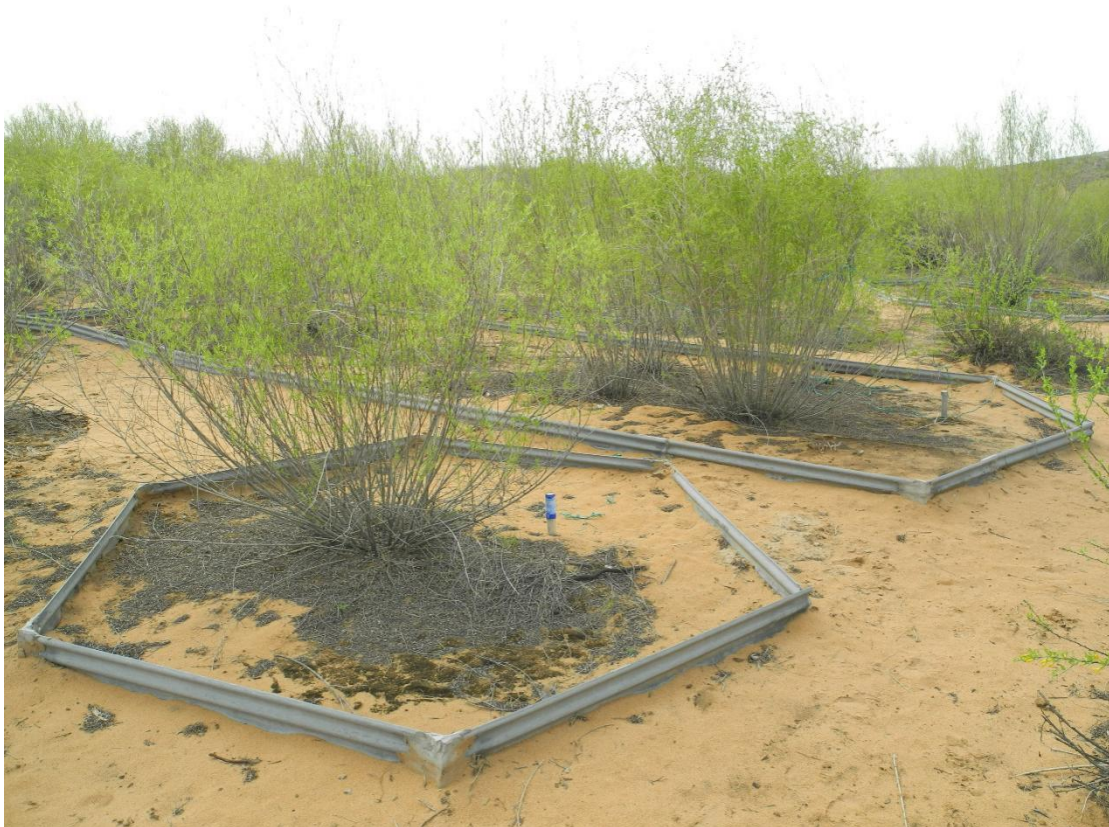

**Fig. R2-1.** The established runoff and sediment plots at the *S. psammophila* plot.  
(4) Stemflow intensity had been re-calculated on the basis of branch basal area. Please see the detailed description at [Point \(1\) of Reply to R2C2](#).

**R2C4:** More detailed comments:

lines 49-50: it is difficult to generalise from these few data to all "water stressed regions" (and need to define what a water-stressed region is)

**Reply:** Done. We have revised the "water-stressed regions" into "dryland ecosystems with



中国科学院生态环境研究中心  
Research Center for Eco-Environmental Science  
Chinese Academy of Sciences (CAS)

北京市海淀区双清路 18 号 邮编: 100085 Website: www.rcees.ac.cn  
#18 Shuangqing Road, Haidian District, Beijing 100085, P. R. China  
Tel: 0086-10-62911239 Email: gygao@rcees.ac.cn

---

annual mean rainfall ranging in 154–900 mm” (Line 53, Page 3), which was cited from the reporting of Magliano et al. (2019).

**R2C5:** line 57: mL/g of what? biomass?

**Reply:** It was the unit of stemflow productivity (Yuan et al., 2016; 2017), which represented the stemflow volume of unit biomass. The description has been added at Line 57, Page 3.

**R2C6:** line 61: a flow in units of mL/min is a flux, not a speed

**Reply:** Done. We change the “speed” into “flux” at Line 61, Page 3.

**R2C7:** line 69: should presumably say ‘not until AFTER canopies became saturated’

**Reply:** Done (Line 73, Page 4).

**R2C8:** line 70: need to define RA when this contraction is first used. It is used again in line 138 before being defined.

**Reply:** RA has been firstly used and explained at Line 52, Page 3.

**R2C9:** line 76: missing a space before 0.4

**Reply:** Done.

**R2C10:** lines 77-78: need to include branch surfaces also line 83: need to state which measure is maximized

**Reply:** Done. “branch surfaces” has been included at Line 79, and the “stemflow flux” has been stated at Line 84 of Page 4 at the revised manuscript.

**R2C11:** line 85: explain why time lags are important: presumably the last stemflow would occur as a very small (negligible) flux, so why is the timing of the last stemflow important? More generally, the authors could say something about why the time variation of stemflow during rainfall is important. Do peaks of stemflow flux exceed soil infiltration capacity, perhaps? Otherwise, why is this important?

**Reply:** Thank you for this comment. Stemflow might take a minor part of rainfall amount, but it greatly contributes to the survival of xerophytic plant species (Návar, 2011), the maintenance of patch structures in arid areas (Kéfi et al., 2007), and the normal functioning of rainfed dryland ecosystems (Wang et al., 2011) (Lines 52–57, Page 3). Previous studies failed to depict stemflow processes and quantify their relations with rainfall characteristics within events, particularly for xerophytic shrubs (Lines 20–23, Page 1). Time lags of stemflow generation, maximization and ending to rains depicted dynamic stemflow process, and were conducive to better understand the hydrological process occurred at the interface between the intercepted rains and soil moisture (Sprenger et al., 2019). It was important to discuss the temporal persistence in spatial patterns of soil moisture particularly at the intra-event scale (Gao et al.,



中国科学院生态环境研究中心  
Research Center for Eco-Environmental Science  
Chinese Academy of Sciences (CAS)

北京市海淀区双清路 18 号 邮编: 100085 Website: www.rcees.ac.cn  
#18 Shuangqing Road, Haidian District, Beijing 100085, P. R. China  
Tel: 0086-10-62911239 Email: gygao@rcees.ac.cn

---

2019) (Lines 86–92, Pages 4–5).

**R2C12:** line 100: no need to repeat the number of rainfall events here, and again in line 222 and again in line 248. Once is sufficient.

**Reply:** Done.

**R2C13:** line 106: please define 'stemflow intensity' and provide a formula somewhere in the paper

**Reply:** Done. The definition and formula had been detailedly described at Lines 236–248, Pages 11–12.

**R2C14:** line 139: please explain what 'analogue' means here

**Reply:** Done. The “analogue period of time to dry canopies from antecedent rains” had been revise to “same period of time to dry canopies from antecedent rains as that reported by Giacomini and Trucchi (1992), Zhang et al. (2015), Zhang et al., (2017) and Yang et al. (2019)” at Lines 168–170, Page 8.

**R2C15:** lines 147-148: all these timing data are a function of the tipping-bucket filling time (see discussion earlier in this report). When using a TBRG, it is difficult to tell precisely when rain begins or ends, owing to the time that might be required to fill the first tipping- bucket.

**Reply:** The better understanding of stemflow temporal variables was conducive to address the eco-hydrological importance of stemflow as stated at Reply to R2C11. TBRG was not perfect to precisely record stemflow timing, but might be the plausible devices to record stemflow process by far. Please see Point (3) at Reply to R2C1 for justifying the usage of TBRGs to record stemflow process.

**R2C16:** line 153: how is raindrop morphology reflected in this? please explain

**Reply:** The raindrop momentum was calculated with raindrop size and velocity as indicated at Equation 5–9 (Line 184–188, Page 9), which represent the comprehensive effects of raindrop morphology (size) and kinetic energy (velocity).

**R2C17:** line 160: why is mean intensity used here?

**Reply:** The average rainfall intensity was used here to compute the average raindrop diameter and finally raindrop momentum on event base. The 10-min maximum raindrop momentum ( $F_{10}$ ,  $\text{mg}\cdot\text{m}\cdot\text{s}^{-1}$ ) and the average raindrop momentum at the first and last 10 min ( $F_{b10}$  and  $F_{e10}$ , respectively,  $\text{mg}\cdot\text{m}\cdot\text{s}^{-1}$ ) could be calculated with  $I_{10}$ ,  $I_{b10}$  and  $I_{e10}$  as indicated at Equation 5–9 (Line 184–188, Page 9), respectively.

**R2C18:** line 168: since this paper reports a study of branch stemflow only, the title of the paper should be amended to indicate this clearly (i.e., not a study of stemflow on an entire plant)



中国科学院生态环境研究中心  
Research Center for Eco-Environmental Science  
Chinese Academy of Sciences (CAS)

北京市海淀区双清路 18 号 邮编: 100085 Website: www.rcees.ac.cn  
#18 Shuangqing Road, Haidian District, Beijing 100085, P. R. China  
Tel: 0086-10-62911239 Email: gygao@rcees.ac.cn

---

**Reply:** Done. We have revised the title to “Temporal-dependent effects of rainfall characteristics on inter-/intra-event branch-scaled stemflow variability in two xerophytic shrubs” as suggested as Reviewer 3.

**R2C19:** line 171: to what extent were the studied shrubs representative of the wider population? please present some data.

**Reply:** *C. korshinskii* and *S. psammophila* were the dominant shrub species at the arid and semi-arid regions of northwestern China, including Inner Mongolia Autonomous Region, Ningxia Hui Autonomous Region, Xinjiang Uygur Autonomous Region, Qinghai province, Gansu province, Shaanxi province, Shanxi province (Chao and Gong, 1999). Since both species had good drought tolerance, they were commonly planted for soil and water conservation, sand fixation and wind barrier (Li, 2012; Hu et al., 2016; Liu et al., 2016; Zhang et al., 2018). As the typical xerophytic shrub species at this region, they had extensive distributions particularly in arid and desert steppes (Li et al., 2016) at **Lines 129–132, Page 6**. Besides, please see **Point (3) at Reply to R2C3** for explaining the representativeness of the selected 4 experimental shrubs for the *C. korshinskii* and *S. psammophila* plots.

**R2C20:** line 181: please explain what is meant by ‘canopy skirt locations’. The photos suggest that there were many overhanging leaves and branches. Some of the stemflow collars were placed quite high off the ground (as far as can be judged from the photos, as no quantitative information on this is included in the paper). How do the authors know that the stemflow at these heights would actually reach the ground, and not drip off the branches?

**Reply:** The “canopy-skirt locations” has been revised to “the outlayer-of-canopy” at **Lines 210, Page 10**. The photo shot the lower part of branches to show foil collar and TBRG for stemflow trapping and recording, which might not provide a very clear view of leaves on the upper branches. In contrast to the centered branches, stemflow of branches at the outlayer got less influences from the neighboring ones. We automatically recorded stemflow volume and timing via the RG3-M TBRG with height of 25.7 cm. Therefore, the foil collars were installed at branches nearly 40 cm off the ground (**Lines 223–224, Page 11**). It might be the minimum height for foil collars so as to keep the hose straight, which channelled stemflow down to TBRGs. The lost by dripping off was believed to be acceptable, compared with the commonly-used method to trap stemflow at breast height (1.2 or 1.3 m off ground) at trees particularly at rainforest, where the stemflow volume was much larger.

**R2C21:** line 189-190: what was the external diameter? this should be included as the dimensions of the stemflow collars are critical - it does not seem sufficient simply to assert that they caught no rainfall or released drips of throughfall from above.

**Reply:** The “external diameter” has been revised to “orifice diameter” at **Line 234**. The limited orifice diameter of foil collars minimized the accessing of throughfall and rains into them (Yuan et al., 2017) (**Lines 225–227, Page 11**).



中国科学院生态环境研究中心  
Research Center for Eco-Environmental Science  
Chinese Academy of Sciences (CAS)

北京市海淀区双清路 18 号 邮编: 100085 Website: www.rcees.ac.cn  
#18 Shuangqing Road, Haidian District, Beijing 100085, P. R. China  
Tel: 0086-10-62911239 Email: gygao@rcees.ac.cn

---

**R2C22:** line 270: how were rainfall intensity peaks identified? What makes one peak an intensity peak?

**Reply:** SFI<sub>i</sub>, the instantaneous stemflow intensity, was computed in terms of the tip volume (3.73 mL), branch basal area (mm<sup>2</sup>) and time intervals between neighboring tips recorded by TBRGs as indicated Equation 13 (Line 248, Page 12). The largest SFI<sub>i</sub> was defined as the peak intensity at the incident rains.

**R2C23:** line 292: is the reference to the volume from a single branch or the total from the 7 branches?

**Reply:** We focused on the average stemflow variables of 7 experimental branches, and analyzed the most influential rainfall characteristics affecting them. Please see the detailed explanation at Point 2 of Reply to R2C1 and Point 3 of Reply to R2C2.

**R2C24:** lines 300-310: this is difficult to read, owing to the need to recall the meaning of the very many contractions. Some reminders of what these mean would be useful here.

**Reply:** As indicated at the suggestion commenting at Line 70 of R2C5, the contraction was only explained when it was first used. For an easy reading, the list of symbols had been prepared as appendix at the revised manuscript (Lines 592–593, Pages 27–29).

**R2C25:** line 342: a stemflow intensity of 1232 mm h<sup>-1</sup> is large. What was the flux? I presume that in the case of the authors own work in the present study, the flux was within the capacity of the tipping-bucket gauges (typically a few hundred mm h<sup>-1</sup> at maximum) since the rainfall was not very intense. Some comment on this would be worthwhile.

**Reply:** As indicated at the manual of RG3-M TBRG (<https://www.onsetcomp.com/products/data-loggers/rg3-m>), data could be automatically recorded at rains with the maximum intensity of 127 mm·h<sup>-1</sup>. The unit depth (mm) of inflow water recorded by TBRG was interpreted to the equivalent 1000 cm<sup>3</sup> water on the 1-m<sup>2</sup> ground surface. However, stemflow intensity was computed with branch basal areas. It approximately ranged in 34–770 mm<sup>2</sup> for *C. korshinskii* and *S. psammophila* in this study, which took less than 0.8‰ of 1 m<sup>2</sup>. Therefore, it could be estimated that the RG3-M TBRG offers the ability to record stemflow with the maximum intensity greater than 15000 mm·h<sup>-1</sup>.

**R2C26:** lines 383-384: but these fluxes would surely depend on the antecedent leaf and branch wetness, and on meteorological conditions such as wind speed and vapour deficit (the latter is not reported, incidentally).

**Reply:** Thank you for this comment. The evaporation coefficient (E, unitless) had been included at the revised manuscript. E was computed with air temperature, relative humidity and wind speed as indicated at Equation 1–3 (Lines 158–160, Page 8). It represented the comprehensive influences of these meteorological characteristics. By performing the multiple



中国科学院生态环境研究中心

Research Center for Eco-Environmental Science  
Chinese Academy of Sciences (CAS)

北京市海淀区双清路 18 号 邮编: 100085 Website: www.rcees.ac.cn  
#18 Shuangqing Road, Haidian District, Beijing 100085, P. R. China  
Tel: 0086-10-62911239 Email: gygao@rcees.ac.cn

---

correspondence analysis (MCA), E and rainfall duration (RD) were tested to closely relate with stemflow duration (Lines 360–362, Page 17). However, the stepwise regression analysis finally confirmed the dominant influence of RD affecting SFD (Lines 381–382, Page 18). Rainfall intervals, the time intervals between neighboring rains (RI, h), was applied to indirectly represent the branch wettability. Please see the detailed description at Point (3) at Reply to R2C3.

**R2C27:** Table 2: why are only 3 rainfall events listed here? More than 40 more are simply lumped under "others" and no details are provided. Why?

**Reply:** Event A, B and C represented three categories of events with the single, double and multiple intensity peak amounts. It had been described at the note of Table 2 (Lines 808–816, Page 40) and Section 3.1 (Lines 301–303, Pages 14). There were 17, 11 and 15 events at Event A, B and C, respectively. Because the remaining 11 events had the average RA of 0.6 mm, no more than three recordings had been observed within event which was limited by 0.2-mm resolution of TBRGs. Therefore, they could not be categorized and grouped as Event others (Lines 303–06, Page 14).

**R2C28:** Figure 4 shows units of m/h which I presume should be mm/h

**Reply:** Done.

#### Reference:

- Allaby, M.: A Dictionary of Ecology, 4th Edition., Oxford University Press, Oxford, 2010.
- Cayuela, C., Llorens, P., Sánchez-Costa, E., Levia, D.F. and Latron, J.: Effect of biotic and abiotic factors on inter- and intra-event variability in stemflow rates in oak and pine stands in a Mediterranean mountain area, *J. Hydrol.*, 560, 396–406, <https://doi.org/10.1016/j.jhydrol.2018.03.050>, 2018.
- Chao, P. N. and Gong, G. T.: *Salix (Salicaceae)*, in: Flora of China, edited by: Wu, Z. Y., Raven, P. H., and Hong, D. Y., Science Press, Beijing and Missouri Botanical Garden Press, St. Louis, 162–274, 1999.
- Dunkerley, D.: Stemflow on the woody parts of plants: dependence on rainfall intensity and event profile from laboratory simulations, *Hydrol. Process.*, 28, 5469–5482, <http://dx.doi.org/10.1002/hyp.10050>, 2014a.
- Dunkerley, D.: Stemflow production and intrastorm rainfall intensity variation: an experimental analysis using laboratory rainfall simulation, *Earth Surf. Proc. Land.*, 39, 1741–1752, <http://dx.doi.org/10.1002/esp.3555>, 2014b.
- Firn, R.: Plant Intelligence: an Alternative Point of View, *Ann. Bot.*, 93, 345–351, 2004.
- Gao, X.D., Zhao, X.N., Pan, D.L., Yu, L.Y. and Wu, P.T.: Intra-storm time stability analysis of surface soil water content, *Geoderma*, 352, 33–37, <https://doi.org/10.1016/j.geoderma.2019.06.001>, 2019.



中国科学院生态环境研究中心

Research Center for Eco-Environmental Science  
Chinese Academy of Sciences (CAS)

北京市海淀区双清路 18 号 邮编: 100085 Website: www.rcees.ac.cn  
#18 Shuangqing Road, Haidian District, Beijing 100085, P. R. China  
Tel: 0086-10-62911239 Email: gygao@rcees.ac.cn

---

- Germer, S., Werther, L. and Elsenbeer, H.: Have we underestimated stemflow? Lessons from an open tropical rainforest, *J. Hydrol.*, 395, 169–179, <https://doi.org/10.1016/j.jhydrol.2010.10.022>, 2010.
- Groisman, P. Y. and Legates, D. R.: The accuracy of United States precipitation data, *B. Am. Meteorol. Soc.*, 75, 215–227, 1994.
- Giacomin, A. and Trucchi, P.: Rainfall interception in a beech coppice (*Acquerino, Italy*). *J. Hydrol.*, 137, 141–147, [https://doi.org/10.1016/0022-1694\(92\)90052-W](https://doi.org/10.1016/0022-1694(92)90052-W), 1992.
- Herwitz, S.R.: Infiltration-excess caused by Stemflow in a cyclone-prone tropical rainforest, *Earth Surf. Proc. Land*, 11, 401–412, <https://doi.org/10.1002/esp.3290110406>, 1986.
- Hu, R., Wang, X.P., Zhang, Y.F., Shi, W., Jin, Y.X. and Chen, N.: Insight into the influence of sand-stabilizing shrubs on soil enzyme activity in a temperate desert, *Catena*, 137, 526–535, <http://dx.doi.org/10.1016/j.catena.2015.10.022>, 2016.
- Iida, S., Shimizu, T., Kabeya, N., Nobuhiro, T., Tamai, K., Shimizu, A., Ito, E., Ohnuki, Y., Abe, T., Tsuboyama, Y., Chann, S. and Keth, N.: Calibration of tipping-bucket flow meters and rain gauges to measure gross rainfall, throughfall, and stemflow applied to data from a Japanese temperate coniferous forest and a Cambodian tropical deciduous forest, *Hydrol. Process.*, 26, 2445–2454, <https://doi.org/10.1002/hyp.9462>, 2012.
- Kéfi, S., Rietkerk, M., Alados, C.L., Pueyo, Y., Papanastasis, V.P., ElAich, A. and De Ruiter, P.C.: Spatial vegetation patterns and imminent desertification in Mediterranean arid ecosystems, *Nature*, 449, 213–217, <https://doi.org/10.1038/nature06111>, 2007.
- Li, X.R., 2012. *Eco-Hydrology of Biological Soil Crusts in Desert Regions of China*. Higher Education Press, Beijing (In Chinese).
- Li, Y.Y., Chen, W.Y., Chen, J.C. and Shi, H.: Contrasting hydraulic strategies in *Salix psammophila* and *Caragana korshinskii* in the southern Mu Us Desert, China, *Ecol. Res.*, 31, 869–880, <https://doi.org/10.1007/s11284-016-1396-1>, 2016.
- Liu, Y.X., Zhao, W.W., Wang, L.X., Zhang, X., Daryanto, S. and Fang, X.N.: Spatial variations of soil moisture under *Caragana korshinskii* kom. from different precipitation zones: field based analysis in the Loess Plateau, China, *Forests*, 7, <https://doi.org/10.3390/f7020031>, 2016.
- Magliano, P.N., Whitworth-Hulse, J.I. and Baldi, G.: Interception, throughfall and stemflow partition in drylands: Global synthesis and meta-analysis, *J. Hydrol.*, 568, 638–645, <https://doi.org/10.1016/j.jhydrol.2018.10.042>, 2019.
- Návar, J.: Stemflow variation in Mexico's northeastern forest communities: Its contribution to soil moisture content and aquifer recharge, *J. Hydrol.*, 408, 35–42, <https://doi.org/10.1016/j.jhydrol.2011.07.006>, 2011.
- Spencer, S. A. and van Meerveld, H. J.: Double funnelling in a mature coastal British Columbia forest: spatial patterns of stemflow after infiltration, *Hydrol. Process.*, 30, 4185–4201, <https://doi.org/10.1002/hyp.10936>, 2016.
- Sprenger, M., Stumpp, C., Weiler, M., Aeschbach, W., Allen, S.T., Benettin, P., Dubbert, M., Hartmann, A., Hrachowitz, M., Kirchner, J.W., McDonnell, J.J., Orłowski, N., Penna, D.,



中国科学院生态环境研究中心

Research Center for Eco-Environmental Science  
Chinese Academy of Sciences (CAS)

北京市海淀区双清路 18 号 邮编: 100085 Website: www.rcees.ac.cn  
#18 Shuangqing Road, Haidian District, Beijing 100085, P. R. China  
Tel: 0086-10-62911239 Email: gygao@rcees.ac.cn

---

- Pfahl, S., Rinderer, M., Rodriguez, N., Schmidt, M. and Werner, C.: The Demographics of Water: A Review of Water Ages in the Critical Zone, *Rev. Geophys.*, 57, 1–35, <https://doi.org/10.1029/2018RG000633>, 2019.
- Turner, B., Hill, D.J., Carlyle-Moses, D.E. and Rahman, M.: Low-cost, high-resolution stemflow sensing, *J. Hydrol.*, 570, 62–68, <https://doi.org/10.1016/j.jhydrol.2018.12.072>, 2019.
- Wang, X.P., Wang, Z.N., Berndtsson, R., Zhang, Y.F. and Pan, Y.X.: Desert shrub stemflow and its significance in soil moisture replenishment, *Hydrol. Earth Syst. Sci.*, 15, 561–567, <https://doi.org/10.5194/hess-15-561-2011>, 2011.
- Yuan, C., Gao, G.Y. and Fu, B.J.: Stemflow of a xerophytic shrub (*Salix psammophila*) in northern China: Implication for beneficial branch architecture to produce stemflow, *J. Hydrol.*, 539, 577–588, <https://doi.org/10.1016/j.jhydrol.2016.05.055>, 2016.
- Yuan, C., Gao, G.Y. and Fu, B.J.: Comparisons of stemflow and its bio-/abiotic influential factors between two xerophytic shrub species, *Hydrol. Earth Syst. Sci.*, 21, 1421–1438, <https://doi.org/10.5194/hess-21-1421-2017>, 2017.
- Zhang, Y.F., Wang X.P., Hu, R., Pan Y.X. and Paradeloc, M.: Rainfall partitioning into throughfall, stemflow and interception loss by two xerophytic shrubs within a rain-fed revegetated desert ecosystem, northwestern China, *J. Hydrol.*, 527, 1084–1095, <https://doi.org/10.1016/j.jhydrol.2015.05.060>, 2015.
- Yang, X.L., Shao, M.A. and Wei, X.H.: Stemflow production differ significantly among tree and shrub species on the Chinese Loess Plateau, *J. Hydrol.*, 568, 427–436, <https://doi.org/10.1016/j.jhydrol.2018.11.008>, 2019.
- Zhang, Y., Li, X.Y., Li, W., Wu, X.C., Shi, F.Z., Fang, W.W. and Pei, T.T.: Modeling rainfall interception loss by two xerophytic shrubs in the Loess Plateau, *Hydrol. Process.*, 31, 1926–1937, <https://doi.org/10.1002/hyp.11157>, 2017.
- Zhang, Y.F., Wang, X.P., Hu, R. and Pan, Y.X.: Meteorological influences on process-based spatial-temporal pattern of throughfall of a xerophytic shrub in arid lands of northern China, *Sci. Total. Environ.*, 619, 1003–1013, <https://doi.org/10.1016/j.scitotenv.2017.11.207>, 2018.





中国科学院生态环境研究中心  
Research Center for Eco-Environmental Science  
Chinese Academy of Sciences (CAS)

北京市海淀区双清路 18 号 邮编: 100085 Website: www.rcees.ac.cn  
#18 Shuangqing Road, Haidian District, Beijing 100085, P. R. China  
Tel: 0086-10-62911239 Email: gygao@rcees.ac.cn

---

### Response to Reviewer #3

**General Comments:** After careful review, I think, in many ways, this is a good manuscript. The work has been well done and the manuscript is well organized. The paper has an appropriate length and the topic is of interest to the general readers of HESS...I recommend this manuscript for publication after a minor revision.

**Reply:**

We appreciated the anonymous reviewer for the comments and suggestions. This manuscript will be carefully revised as suggested prior to being submitted.

**R3C1:** My major concern is the reasonability of the stemflow variables used in this study. For instance, in Line 207, the authors said that the average (SFI) and 10-min maximum (SFI<sub>10</sub>) stemflow intensities were calculated by the branch stemflow as recorded by the tipping-bucket rain gauges (mm) and rainfall duration (h). In my opinion, stemflow intensities should be defined as the branch stemflow depth (which can be calculated from branch stemflow volume as divided by branch basal area) in a certain time. In the current form, the authors underestimated stemflow intensities. Also, in Line 216, the ratio of the intra-event stemflow intensity (RSFI, unitless) should be calculated basing on the suggested calculation of stemflow intensity.

**Reply:**

Thank you for commenting on the calculation of stemflow variables in this study. As suggested at this comment, it indeed underestimated the eco-hydrological significance of stemflow to compute stemflow intensity by ignoring the limited area of branch base, over which stemflow was received. Therefore, we had re-computed stemflow intensity following the definition as stemflow volume per basal area per unit of time (Herwitz, 1986; Spencer and Meerveld, 2016). It had been calculated at different time intervals, including the event (SFI, mm·h<sup>-1</sup>), 10-min (SFI<sub>10</sub>, mm·h<sup>-1</sup>) and dynamic time interval between neighboring tips (SFI<sub>i</sub>, mm·h<sup>-1</sup>). Besides, RSFI had been deleted, and funnelling ratio had been introduced to assess the convergence effect of stemflow at the revised manuscript. It had been quantitatively connected with stemflow intensity for the first time as indicated at Equations 14–15 (Lines 264–265, Page 12). Please see the detailed explanation at Point (1) of Reply to R1C12, and Point (1) of Reply to R2C2.

**R3C2:** I also state minor comments as follows. L1: Only seven branches were used to measure stemflow for each shrub species (The studied shrubs had a total of 180 and 261 branches), So the suggested title is: Temporal-dependent effects of rainfall characteristics on inter-/intra-event branch-scale stemflow variability in two xerophytic shrubs.

**Reply:** Done.



中国科学院生态环境研究中心  
Research Center for Eco-Environmental Science  
Chinese Academy of Sciences (CAS)

北京市海淀区双清路 18 号 邮编: 100085 Website: www.rcees.ac.cn  
#18 Shuangqing Road, Haidian District, Beijing 100085, P. R. China  
Tel: 0086-10-62911239 Email: gygao@rcees.ac.cn

---

**R3C3:** L220-226: It could be better if the authors provide the formula for each stemflow variables.

**Reply:**

Done. The detailed descriptions and calculations of stemflow variables had been stated at the revised manuscript, including stemflow volume (SFV, mL) (Equation 10) at [Line 235, Page 11](#), stemflow duration (SFD, h), time lags stemflow generation (TLG, min), maximization and ending (TLE, min) at [Lines 249–257, Page 12](#), stemflow intensities at the event bases (SFI), the 10-min interval (SFI<sub>10</sub>) and the dynamic intervals between neighboring tips of TBRG (SFI<sub>i</sub>) (Equation 11–13) at [Lines 246–248, Page 12](#), funnelling ratio at event base (FR) and the 100-s (FR<sub>100</sub>) intervals (Equation 14–15) at [Lines 264–265, Page 12](#).

**R3C4:** L658. Table 1: What is the standard for base diameter (BD) categorization? In the current form, the class interval (5–10, 10–15, 15–18, 18–25, >25 mm) is variable. Why not 5–10, 10–15, 15–20, 20–25, and >25 mm? Please explain it.

**Reply:**

Thanks for this comment. Based on the plot investigation for *C. korshinskii* and *S. psammophila*, standard shrubs canopies could be determined. Four shrubs and 1 shrub had been selected for stemflow measurements and allometric equations establishments. By measuring branch morphologies at all the branches at these five shrubs of each species, BD categories was determined to guarantee the minimum branch amount at each category for meeting the statistical significance. There was comparatively smaller amount of the 20–25-mm branches of *C. korshinskii*. Applying the categories interval of 15–18 and 18–25 was aimed to make sure the minimum branches amount between these two neighboring categories for meeting the statistical significance. Please see [Point \(4\) at Reply to R2C2](#) and [Point \(3\) at Reply to R2C3](#) for explaining the representativeness of selected 7 branches and 4 shrubs for stemflow recording, respectively.

**R3C5:** L662. Table 2: Do the rainfall indicators including RA, RD, RI, I, I10, Ib10 etc differ statically significantly among Event A, Event B, Event C and Others? Please provide the ANVOA results here. L670. Table 3: The comment is the same with the last one. Please provide the statistical results to depict the difference in the stemflow variables among Event A, Event B, Event C and Others.

**Reply:**

Thank you for this comment. The One-way analysis of variance (ANOVA) with LSD post hoc test had been performed to determine whether rainfall characteristics and stemflow variables differed significantly among event categories, and whether funnelling ratio and stemflow intensities differed significantly among BD categories for *C. korshinskii* and *S. psammophila*. The level of significance was set at 95% confidence interval ( $p=0.05$ ) ([Lines 284–289, Pages 13–14](#)). The ANOVA results had been stated in the section 3.1 *Rainfall characteristics* at [Lines 307–312, Page 14–15](#), Section 3.2 *Stemflow volume, intensity, funnelling ratio and temporal dynamics* at [Lines 337–342, Page 16](#), and Table 2–4 ([Lines 808–829, Pages 40–42](#)).



中国科学院生态环境研究中心  
**Research Center for Eco-Environmental Science**  
**Chinese Academy of Sciences (CAS)**

北京市海淀区双清路 18 号 邮编: 100085 Website: [www.rcees.ac.cn](http://www.rcees.ac.cn)  
#18 Shuangqing Road, Haidian District, Beijing 100085, P. R. China  
Tel: 0086-10-62911239 Email: [gygao@rcees.ac.cn](mailto:gygao@rcees.ac.cn)

---

---

**Reference:**

- Herwitz, S.R.: Infiltration-excess caused by Stemflow in a cyclone-prone tropical rainforest, *Earth Surf. Proc. Land*, 11, 401–412, <https://doi.org/10.1002/esp.3290110406>, 1986.
- Spencer, S. A. and van Meerveld, H. J.: Double funnelling in a mature coastal British Columbia forest: spatial patterns of stemflow after infiltration, *Hydrol. Process.*, 30, 4185–4201, <https://doi.org/10.1002/hyp.10936>, 2016.

1 **Temporal-dependent effects of rainfall characteristics on**  
2 **inter-/intra-event branch-scaled stemflow variability in two**  
3 **xerophytic shrubs**

4  
5 **Chuan Yuan<sup>1,2,3</sup>, Guangyao Gao<sup>2</sup>, Bojie Fu<sup>2</sup>, Daming He<sup>1,3</sup>, Xingwu Duan<sup>1,3</sup>, and**  
6 **Xiaohua Wei<sup>4</sup>**

7  
8 <sup>1</sup>Institute of International Rivers and Eco–security, Yunnan University, Kunming 650091,  
9 China

10 <sup>2</sup>State Key Laboratory of Urban and Regional Ecology, Research Center for  
11 Eco-Environmental Sciences, Chinese Academy of Sciences, Beijing 100085, China

12 <sup>3</sup>Yunnan Key Laboratory of International Rivers and Trans-boundary Eco–security, Kunming  
13 650091, China

14 <sup>4</sup>Department of Earth, Environmental and Geographic Sciences, University of British  
15 Columbia (Okanagan campus), Kelowna, British Columbia, V1V 1V7, Canada

16  
17 **Correspondence:** Guangyao Gao (gygao@rcees.ac.cn)

18  
19 **Abstract**

20 Stemflow is important for recharging root-zone soil moisture in arid regions. Previous  
21 studies have generally focused on stemflow volume, efficiency and influential factors but  
22 have failed to depict stemflow processes and quantify their relations with rainfall  
23 characteristics within events, particularly for xerophytic shrubs. Here, we measured the  
24 stemflow volume, intensity, funnelling ratio, duration, and time lags to rain at two

25 dominant shrub species (*Caragana korshinskii* and *Salix psammophila*) and rainfall  
26 characteristics during 54 events at the semi-arid Liudaogou catchment of the Loess Plateau,  
27 China, during the 2014–2015 rainy seasons. Funnelling ratio was calculated as the ratio  
28 between stemflow and rainfall intensities at the inter-/intra-event bases for the first time.  
29 Our results indicated that the stemflow of *C. korshinskii* and *S. psammophila* were  
30 averagely started 66.2 and 54.8 min, maximized 109.4 and 120.5 min after rains began, and  
31 ended 20.0 and 13.5 min after rains ceased. They had shorter stemflow duration (3.8 and  
32 3.4 h) and significantly larger stemflow intensities (517.5 and 367.3 mm·h<sup>-1</sup>) than those of  
33 rains (4.7 h and 4.5 mm·h<sup>-1</sup>). As branch size increased, both species shared the decreasing  
34 funnelling ratios (97.7–163.7 and 44.2–212.0) and stemflow intensities (333.8–716.2  
35 mm·h<sup>-1</sup> and 197.2–738.7 mm·h<sup>-1</sup>). Tested by the multiple correspondence analysis and  
36 stepwise regression, rainfall amount and duration controlled stemflow volume and duration,  
37 respectively, at event scale by linear relations ( $p < 0.01$ ). Rainfall intensity and raindrop  
38 momentum controlled stemflow intensity and time lags to rains for both species within  
39 event by linear or power relationships ( $p < 0.01$ ). Rainfall intensity was the key factor  
40 affecting stemflow process of *C. korshinskii*, whereas raindrop momentum had the greatest  
41 influence on stemflow process of *S. psammophila*. Therefore, rainfall characteristics had  
42 temporal-dependent influences on corresponding stemflow variables, and the influence also  
43 depended on specific species.

44

## 45 **1 Introduction**

46 Stemflow directs the intercepted rains from canopy to the trunk base. The

47 funnel-shaped canopy and underground preferential paths, i.e., roots, worm paths and soil  
48 macropores, converge rains to recharge the root-zone moisture (Johnson and Lehmann,  
49 2006; Li et al., 2008). Stemflow is important to concentrate water (Levia and Germer,  
50 2015), nutrients (Dawoe et al., 2018), pathogens (Garbelotto et al., 2003) and bacteria  
51 (Bittar et al., 2018) from the phyllosphere into the pedosphere (Teachey et al., 2018), even  
52 though stemflow accounts for only a minor part of rainfall amount (RA) (6.2%) in contrast  
53 to throughfall (69.8%) and interception loss (24.0%) in dryland ecosystems with annual  
54 mean rainfall ranging in 154–900 mm (Magliano et al., 2019). Stemflow greatly contributes  
55 to the survival of xerophytic plant species (Návar, 2011), the maintenance of patch  
56 structures in arid areas (Kéfi et al., 2007), and the normal functioning of rainfed dryland  
57 ecosystems (Wang et al., 2011).

58 To quantify the ecohydrological importance of stemflow, numerous studies have been  
59 conducted on stemflow production and efficiency from various aspects, including stemflow  
60 volume (mL), depth (mm), percentage (%), funnelling ratio (unitless), and productivity  
61 ( $\text{mL}\cdot\text{g}^{-1}$ , the branch stemflow volume of unit biomass) (Herwitz, 1986; Yuan et al., 2016;  
62 Zabret et al., 2018; Yang et al., 2019). By installing automatic recording devices, the  
63 stemflow process has been gradually determined at 1-h intervals (Spencer and van  
64 Meerveld, 2016), 5-min intervals (André et al., 2008; Levia et al., 2010) and 2-min  
65 intervals (Dunkerley, 2014b). This determination allowed to compute stemflow intensity  
66 ( $\text{mm}\cdot\text{h}^{-1}$ ) (Germer et al., 2010), flux ( $\text{mL}\cdot\text{min}^{-1}$ ) (Yang, 2010) and time lag after rain  
67 (Cayuela et al., 2018). Differing from an event-based calculation, the stemflow process  
68 provided insights into the fluctuation of stemflow production at a high temporal resolution.

69 It permits a better interpretation of the “hot moment” and “hot spot” effects of many  
70 ecohydrological processes (Bundt et al., 2001; McClain et al., 2003). Quantifying the  
71 short-intensity burst and temporal characteristics shed light on the dynamic process and  
72 pulse nature of stemflow (Dunkerley, 2019).

73 Stemflow cannot be initiated until canopies were saturated by the rains  
74 (Martinez-Meza and Whitford, 1996). The minimal RA needed to start stemflow was  
75 usually calculated by regressing stemflow volume with RA at different plant species (Levia  
76 and Germer, 2015). It also varied with canopy states, i.e., 10.9 and 2.5–3.4mm for the  
77 leafed oak and beech tress, and 6.0 mm and 1.5–1.9 mm for them in the leafless period  
78 (André et al., 2008; Staelens et al., 2008). Stemflow also frequently continued after rains  
79 ceased due to the rainwater retained on the canopy/branch surface (Iida et al., 2017). *Salix*  
80 *psammophila* and an open tropical forest started stemflow 5–10 min and 15 min later than  
81 the beginning of a rain event in the Mu Us desert of China (Yang, 2010) and the Amazon  
82 basin of Brazil (Germer et al., 2010), respectively. However, 1 h and 1.5 h were needed to  
83 start stemflow after the beginning of a rain event for pine and oak trees in north-eastern  
84 Spain, respectively (Cayuela et al., 2018). For *S. psammophila*, stemflow flux was  
85 maximized 20–210 min after the beginning of a rain event (Yang, 2010), and stemflow  
86 ceased 11 h after rains seaced in an open tropical forest (Germer et al., 2010). Time lags of  
87 stemflow generation, maximization and ending to rains depicted dynamic stemflow process,  
88 and were conducive to better understand the hydrological process occurred at the interface  
89 between the intercepted rains and soil moisture (Sprenger et al., 2019). It was important to  
90 discuss the temporal persistence in spatial patterns of soil moisture particularly at the

91 intra-event scale (Gao et al., 2019). However, stemflow time lags have not been  
92 systematically studied for xerophytic shrubs.

93 The preferential paths at the underside of branches for delivering stemflow complicates  
94 stemflow processes within events (Dunkerley, 2014a). The influences of bark microrelief  
95 on stemflow are strongly affected by dynamic rain processes, such as rainfall intensity and  
96 raindrop striking within events (van Stan and Levia, 2010). While exceeding the holding  
97 capacity of branches, high rainfall intensity could overload and interrupt this preferential  
98 path (Carlyle-Mose and Price, 2006). Raindrops hit the canopy surface and create splashes  
99 on the surface. This process is conducive to wetting branches at the lower layers and  
100 accelerating the establishment of the preferential paths of stemflow transportation (Bassette  
101 and Bussière, 2008). Nevertheless, the interaction between the stemflow process and  
102 intra-event rainfall characteristics has not been substantially studied.

103 This study was designed at the event and process scales to investigate inter-/intra-event  
104 stemflow variability of two dominant xerophytic shrubs. Stemflow volume, intensity,  
105 funnelling ratio and temporal dynamics of *Caragana korshinskii* and *S. psammophila* were  
106 recorded during 54 rainfall events in the 2014–2015 rainy seasons on the Loess Plateau of  
107 China. Temporal dynamics were expressed as stemflow duration and time lags of stemflow  
108 generation, maximization and cessation to rains. Raindrop momentum was introduced to  
109 represent the comprehensive effects of raindrop size, velocity, inclination angle and kinetic  
110 energy at the stemflow process. Funnelling ratio had been calculated at the event base and  
111 the 100-s intervals to assess the convergence effects of stemflow. This study specifically  
112 aimed to (1) depict the stemflow process in terms of stemflow intensity and temporal



113 dynamics, (2) identify the dominant rainfall characteristics influencing inter-/intra-event  
114 stemflow variables, and (3) quantify the relationships between stemflow process variables  
115 and rainfall characteristics. Achieving these objectives would advance our knowledge of  
116 the process-based stemflow production to better understand the pulse nature of stemflow  
117 and its interactions with dynamic rain processes.

## 118 **2 Materials and Methods**

### 119 **2.1 Site description**

120 This study was conducted in the Liudaogou catchment (110°21'–110°23'E, 38°46'–  
121 38°51'N) in Shenmu city, Shaanxi Province, China, during the 2014–2015 rainy seasons.  
122 This catchment is 6.9 km<sup>2</sup> and 1094–1273 m above sea level (m.a.s.l.). A semiarid  
123 continental climate prevails in this area. The mean annual precipitation (MAP) is 414 mm  
124 (1971–2013). Most MAP (77%) occurs from July to September (Jia et al., 2013). The mean  
125 annual potential evaporation is 1337 mm (Yang et al., 2019). The mean annual temperature  
126 is 9.0 °C. The dominant shrubs include *C. korshinskii*, *S. psammophila*, and *Amorpha*  
127 *fruticosa*. The dominant grasses are *Artemisia capillaris*, *Artemisia sacrorum*, *Medicago*  
128 *sativa*, *Stipa bungeana*, etc.

129 *C. korshinskii* and *S. psammophila* are dominant shrub species at the arid and semi-arid  
130 regions of northwestern China (Hu et al., 2016; Liu et al., 2016). They were commonly  
131 planted for soil and water conservation, sand fixation and wind barrier, and had extensive  
132 distributions at this region (Li et al., 2016). The both species have inverted-cone crowns  
133 and no trunks, with multiple branches running obliquely from the base. As modular  
134 organisms and multi-stemmed shrub species, their branches live as independent individuals

135 and compete with each other for water and light (Firn, 2004). Two plots were established in  
136 the southwestern catchment for these two xerophytic shrubs planted in the 1990s (Fig. 1). *C.*  
137 *korshinskii* and *S. psammophila* plots share similar stand conditions with elevations of 1179  
138 and 1207 m.a.s.l., slopes of 13° and 18°, and sizes of 3294 and 4056 m<sup>2</sup>, respectively. The  
139 *C. korshinskii* plot has a ground surface of loess and aspect of 224°, while the *S.*  
140 *psammophila* plot has a ground surface of sand and an aspect of 113°.

## 141 **2.2 Meteorological measurements and calculations**

142 A meteorological station was installed at the experimental plot of *S. psammophila* to  
143 record rainfall characteristics and wind speed (WS, m·s<sup>-1</sup>) (Model 03002, R. M. Young  
144 Company, USA), air temperature (T, °C) and relative humidity (H, %) (Model HMP 155,  
145 Vaisala, Finland). They were logged at 10-min intervals by a datalogger (Model CR1000,  
146 Campbell Scientific Inc., USA). Evaporation coefficient (E, unitless) was calculated to  
147 present the evaporation intensity (Equations 1–3) via aerodynamic approaches  
148 (Carlyle-Mose and Schooling, 2015). Tipping-bucket rain gauges (hereinafter referred to as  
149 “TBRG”) automatically recorded the volume and timing of rainfall and stemflow (Herwitz,  
150 1986; Germer et al., 2010; Spencer and Meerveld, 2016; Cayuela et al., 2018). To mitigate  
151 the systematic errors for missing the records of inflow during tipping intervals (Groisman  
152 and Legates, 1994), we chose the Onset® (Onset Computer Corp., USA) RG3-M TBRG  
153 with the relatively smaller underestimation for its smaller bucket volume (3.73±0.01 mL)  
154 (Iida et al., 2012). Besides, three 20-cm-diameter standard rain gauges were placed around  
155 TBRG with a 0.5-m distance at the 120° separation (Fig. 1). The regression ( $R^2=0.98$ ,  
156  $p<0.01$ ) between manual measurements and automatic recording further mitigated the

157 understanding of inflow water by applying TBRG (Equation 4).

$$158 \quad e_s = 0.611 \times \exp\left(\frac{17.27 \times T}{237.7 + T}\right) \quad (1)$$

$$159 \quad \text{VPD} = e_s \times (1 - H) \quad (2)$$

$$160 \quad E = WS \times \text{VPD} \quad (3)$$

161 where  $e_s$  is the saturation vapor pressure (kPa);  $T$  is air temperature ( $^{\circ}\text{C}$ );  $H$  is air relative  
162 humidity (%); VPD is the vapor pressure deficit (kPa); and  $E$  is the evaporation coefficient  
163 (unitless).

$$164 \quad \text{IW}_A = \text{IW}_R \times 1.32 + 0.16 \quad (4)$$

165 where  $\text{IW}_R$  is the recording of Inflow water (including rainfall and stemflow) via TBRG  
166 (mm), and  $\text{IW}_A$  is the adjusted inflow water (mm).

167 Discrete rainfall events were defined by a measurable RA of 0.2 mm (the resolution  
168 limit of the TBRG) and the smallest 4-h gap without rains. That was the same period of  
169 time to dry canopies from antecedent rains as reported by Giacomini and Trucchi (1992),  
170 Zhang et al. (2015), Zhang et al., (2017) and Yang et al. (2019). Rainfall interval (RI, h)  
171 was calculated to indirectly represent the bark wetness. Other rainfall characteristics were  
172 also computed, including the RA (mm), rainfall duration (RD, h), the average and 10-min  
173 maximum rainfall intensity of incident rains ( $I$  and  $I_{10}$ ,  $\text{mm}\cdot\text{h}^{-1}$ ), and the 10-min average  
174 rainfall intensity after rain begins ( $I_{b10}$ ,  $\text{mm}\cdot\text{h}^{-1}$ ) and before rain ends ( $I_{e10}$ ,  $\text{mm}\cdot\text{h}^{-1}$ ). By  
175 assuming a perfect sphere of a raindrop (Uijlenhoet and Torres, 2006), raindrop momentum  
176 in the vertical direction ( $F$ ,  $\text{mg}\cdot\text{m}\cdot\text{s}^{-1}$ ) (Equation 8–9) was computed to comprehensively  
177 represent the effects of raindrop size ( $D$ , mm) (Equation 5), terminal velocity ( $v$ ,  $\text{m}\cdot\text{s}^{-1}$ )  
178 (Equation 6), average inclination angle ( $\theta$ ,  $^{\circ}$ ) (Equation 7) affecting stemflow process

179 (Brandt, 1990; Kimble, 1996; van Stan et al., 2011; Carlyle-Moses and Schooling, 2015).  
 180 The 10-min maximum raindrop momentum ( $F_{10}$ ,  $\text{mg}\cdot\text{m}\cdot\text{s}^{-1}$ ) and the average raindrop  
 181 momentum at the first and last 10 min ( $F_{b10}$  and  $F_{e10}$ , respectively,  $\text{mg}\cdot\text{m}\cdot\text{s}^{-1}$ ) could be  
 182 calculated with  $I_{10}$ ,  $I_{b10}$  and  $I_{e10}$  as indicated at Equation 5–9, respectively. For the 0.8-km  
 183 distance between the two plots, the meteorological data were used at the *C. korshinskii* plot.

$$184 \quad D = 2.23 \times (0.03937 \times I)^{0.102} \quad (5)$$

$$185 \quad v = 3.378 \times \ln(D) + 4.213 \quad (6)$$

$$186 \quad \tan \theta = \frac{WS}{v} \quad (7)$$

$$187 \quad F_0 = m \times v = \left(\frac{1}{6} \times \rho \times \pi \times D^3\right) \times v \quad (8)$$

$$188 \quad F = F_0 \times \cos \theta \quad (9)$$

189 where  $D$  is raindrop diameter (mm);  $I$  is the average rainfall intensity of incident rains  
 190 ( $\text{mm}\cdot\text{h}^{-1}$ );  $v$  is raindrop velocity ( $\text{m}\cdot\text{s}^{-1}$ );  $\theta$  is average inclination angle of raindrops ( $^\circ$ );  $WS$   
 191 is the average wind speed of incident rains ( $\text{m}\cdot\text{s}^{-1}$ );  $F_0$  is the average raindrop momentum  
 192 ( $\text{mg}\cdot\text{m}\cdot\text{s}^{-1}$ );  $m$  is the average raindrop mass (g);  $\rho$  is the density of freshwater at standard  
 193 atmospheric pressure and  $20^\circ\text{C}$  ( $0.998 \text{ g}\cdot\text{cm}^{-3}$ ).

### 194 **2.3 Experimental branch selection and measurements**

195 This study focused on the branch-scaled stemflow production of the 20-year-old *C.*  
 196 *korshinskii* and *S. psammophila*. Based on plot investigation, the canopy traits of standard  
 197 shrubs were determined. Four shrubs were selected accordingly at each species with similar  
 198 crown areas and heights ( $5.1 \pm 0.3 \text{ m}^2$  and  $2.1 \pm 0.2 \text{ m}$  for *C. korshinskii* and  $21.4 \pm 5.2 \text{ m}^2$  and  
 199  $3.5 \pm 0.2 \text{ m}$  for *S. psammophila*, respectively). The approximately 10-m gap between them  
 200 guaranteed shrubs exposing to the similar meteorological conditions (Yuan et al., 2016). We

201 measured branch morphologies of all 180 and 261 branches at experimental shrubs of *C.*  
202 *korshinskii* and *S. psammophila*, respectively, including BD (Basal diameter, mm) with a  
203 Vernier calliper (Model 7D-01150, Forgestar Inc., Germany), branch length (BL, cm) with  
204 a measuring tape, and branch angle (BA, °) with pocket geologic compass (Model DQL-8,  
205 Harbin Optical Instrument Factory, China), respectively. Thus, BD categories were  
206 determined at 5–10 mm, 10–15 mm, 15–18 mm, 18–25 mm and >25 mm to guarantee the  
207 appropriate branch amounts within categories for meeting the statistical significance. Two  
208 representative branches with median BDs were selected in each category for stemflow  
209 recording. The experimental branches had no intercrossing with neighbouring ones and no  
210 turning point in height from branch tip to base. The outlayer-of-canopy positions avoided  
211 over-shading by the upper layer branches and permitted convenient measurements. Since  
212 the qualified branch with the >25-mm size was not enough for *C. korshinskii* and the  
213 TBRG malfunctioned at the 15–18-mm branches of *S. psammophila*, stemflow data were  
214 not available in these BD categories. In total, 7 branches were selected for stemflow  
215 measurements at each species (Table 1). As the important interface to intercept rains at the  
216 growing season, the well-verified allometric growth equations were performed to estimate  
217 the branch leaf area (LA, cm<sup>2</sup>) of *C. korshinskii* ( $LA=39.37 \times BD^{1.63}$   $R^2=0.98$ ) (Yuan et al.,  
218 2017) and *S. psammophila* ( $LA=18.86 \times BD^{1.74}$   $R^2=0.90$ ) (Yuan et al., 2016), respectively.

#### 219 **2.4 Stemflow measurements and calculations**

220 A total of 14 TBRGs had been applied to automatically record the branch stemflow  
221 production of *C. korshinskii* and *S. psammophila*. The data of stemflow volume and timing  
222 were automatically recorded at dynamic intervals between neighboring tips. We installed

223 aluminium foil collars to trap stemflow at branches nearly 40 cm off the ground, higher  
224 than TBRG orifice with height of 25.7 cm (Fig. 1). They were fitted around the entire  
225 branch circumference and sealed by neutral silicone caulking. The limited orifice diameter  
226 of foil collars minimized the accessing of throughfall and rains into them (Yuan et al.,  
227 2017). The 0.5-cm-diameter polyvinyl chloride hoses hung vertically and channelled  
228 stemflow from the collars to TBRGs with a minimum travel time. TBRGs were covered  
229 with the polyethylene films to prevent the accessing of throughfall and splash (Fig. 1).  
230 These apparatuses were periodically checked against leakages or blockages by insects and  
231 fallen leaves. Stemflow variables were computed as follow.

232 (1) Stemflow volume (SFV, mL): the average stemflow volume of individual branches.

233 Adjusted with Equation 4 firstly, SFV was computed with the TBRG recordings  
234 ( $SF_{RG}$ , mm) by multiplying its orifice area ( $186.3 \text{ cm}^2$ ) (Equation 10).

$$235 \quad SFV = SF_{RG} \times 18.63 \quad (10)$$

236 (2) Stemflow intensity: the branch stemflow volume per branch basal area per unit  
237 time. SFI ( $\text{mm}\cdot\text{h}^{-1}$ ) is the average stemflow intensity of incident rains, which is  
238 computed by the event-based SFV (mL), branch basal area (BBA,  $\text{mm}^2$ ) and RD  
239 (h) (Equation 11) (Herwitz, 1986; Spencer and Meerveld, 2016).  $SFI_{10}$  ( $\text{mm}\cdot\text{h}^{-1}$ ) is  
240 the 10-min maximum stemflow intensity, which is calculated with the 10-min  
241 maximum stemflow volume ( $SFV_{10}$ , mL) and BBA ( $\text{mm}^2$ ) (Equation 12).  $SFI_i$   
242 ( $\text{mm}\cdot\text{h}^{-1}$ ) is the instantaneous stemflow intensity, which is calculated by the tip  
243 volume of TBRG (3.73 mL), BBA ( $\text{mm}^2$ ) and time intervals between neighbouring  
244 tips ( $t_i$ , h) (Equation 13). The comparison between  $SFI_i$  and the corresponding

245 rainfall intensity depicted the synchronicity of stemflow with rains within event.

$$246 \quad SFI = 1000 \times \frac{SFV}{(BBA \times RD)} \quad (11)$$

$$247 \quad SFI_{10} = 6000 \times \frac{SFV_{10}}{BBA} \quad (12)$$

$$248 \quad SFI_i = \frac{3730}{(BBA \times t_i)} \quad (13)$$

249 (3) Stemflow temporal dynamics: stemflow duration and time lags to rains.

250 SFD (h): stemflow duration. It is computed by different timings between the first-  
251 and last-tips of stemflow via TBRG.

252 TLG (min): time lag of stemflow generation after rain begins. It is computed by  
253 different first-tip timings between rainfall and stemflow via TBRG.

254 TLM (min): time lag of stemflow maximization after rain begins. It is computed  
255 by different timings between the largest-SFI<sub>i</sub> and first-rainfall tips via TBRG.

256 TLE (min): time lag of stemflow ending after rain ceases. It is computed by  
257 different last-tip timings between rainfall and stemflow via TBRG.

258 (4) Funnelling ratio: the efficiency for capturing and delivering raindrops from the  
259 canopies to trunk/branch base (Siegert and Levia, 2014; Cayuela et al., 2018). By  
260 introducing RD at both numerator and denominator of the original equation  
261 (Herwitz, 1986), FR (unitless) was transformed as the ratio between stemflow and  
262 rainfall intensities at the event base (Equation 14). FR<sub>100</sub> described the  
263 within-event funnelling ratio at the 100-s interval after rain began (Equation 15).

$$264 \quad FR = 1000 \times \frac{SFV}{BBA \times RA} = 1000 \times \frac{\frac{SFV}{BBA} / RD}{RA / RD} = \frac{SFI}{I} \quad (14)$$

$$265 \quad FR_{100_i} = \frac{SFI_{100_i}}{I_{100_i}} \quad (15)$$

266 where SFV is branch stemflow volume (mL); RA is rainfall amount (mm); BBA is  
267 branch basal diameter (mm<sup>2</sup>); RD is rainfall duration (h); SFI and I were stemflow  
268 and rainfall intensities (mm·h<sup>-1</sup>), respectively; FR<sub>100i</sub> is funnelling ratio at the  
269 number *i* interval of 100 s after rain begins.

## 270 **2.5 Data analysis**

271 Stemflow variables were averaged at different BD categories to analyse the most  
272 influential rainfall characteristics affecting them. Pearson correlation analyses were firstly  
273 performed to test the relationships between rainfall characteristics (RA, RD, RI, I, I<sub>10</sub>, I<sub>b10</sub>,  
274 I<sub>e10</sub>, F, F<sub>10</sub>, F<sub>b10</sub>, F<sub>e10</sub> and E) and stemflow variables (SFV, SFI, SFI<sub>10</sub>, FR, TLG, TLM, TLE  
275 and SFD). The significantly related factors were grouped in terms of median value, and  
276 compiled into indicator matrices. They were standardized for a cross-tabulation check as  
277 required by the multiple correspondence analysis (MCA) (Levia et al., 2010; van Stan et al.,  
278 2011, 2016). All qualified data were restructured into orthogonal dimensions (Hair et al.,  
279 1995), where distances between row and column points were maximized (Hill and Lewicki,  
280 2007). As shown at correspondence maps, the clustering rainfall characteristics tightly  
281 related to the centred stemflow variable. Finally, stepwise regressions were operated to  
282 identify the most influential rainfall characteristics (Carlyle-Moses and Schooling, 2015).  
283 The quantitative relations were established in terms of the qualified level of significance (*p*  
284 <0.05) and the highest coefficient of determination (*R*<sup>2</sup>). One-way analysis of variance  
285 (ANOVA) with LSD post hoc test was used to determine whether rainfall characteristics,  
286 and stemflow variables significantly differed among event categories, and whether  
287 funnelling ratio and stemflow intensity significantly differed among BD categories for *C*.



288 *korshinskii* and *S. psammophila*. The level of significance was set at 95% confidence  
289 interval ( $p=0.05$ ). SPSS 21.0 (IBM Corporation, USA), Origin 8.5 (OriginLab Corporation,  
290 USA) and Excel 2019 (Microsoft Corporation, USA) were used for data analysis.

### 291 **3 Results**

#### 292 **3.1 Rainfall characteristics**

293 A total of 20, 8, 10, 8, 4 and 4 rainfall events were recorded in the RA categories of  $\leq 2$   
294 mm, 2–5 mm, 5–10 mm, 10–15 mm, 15–20 mm and  $>20$  mm, respectively. The total RAs  
295 at these categories were 22.1 mm, 26.1 mm, 68.8 mm, 93.3 mm, 74.8 mm and 110.0 mm,  
296 respectively. During these events, the average  $I$ ,  $I_{10}$ ,  $I_{b10}$  and  $I_{e10}$  were  $4.5\pm 1.0$  mm $\cdot$ h $^{-1}$ ,  
297  $10.9\pm 2.1$  mm $\cdot$ h $^{-1}$ ,  $5.5\pm 1.4$  mm $\cdot$ h $^{-1}$  and  $2.8\pm 0.7$  mm $\cdot$ h $^{-1}$ , respectively. The average  $F$ ,  $F_{10}$ ,  
298  $F_{b10}$  and  $F_{e10}$  were  $16.1\pm 1.2$  mg $\cdot$ m $\cdot$ s $^{-1}$ ,  $24.9\pm 1.4$  mg $\cdot$ m $\cdot$ s $^{-1}$ ,  $18.4\pm 1.4$  mg $\cdot$ m $\cdot$ s $^{-1}$  and  $16.0\pm 1.0$   
299 mg $\cdot$ m $\cdot$ s $^{-1}$ , respectively. RD, RI and E averaged  $4.7\pm 0.8$  h,  $50.6\pm 6.1$  h, and  $0.9\pm 0.2$ ,  
300 respectively (Table 2).

301 Rainfall events were further categorized in terms of rainfall-intensity peak amount,  
302 including Events A (the single-peak events), B (the double-peak events) and C (the  
303 multiple-peak events). There were 17, 11 and 15 events at Event A, B and C, respectively.  
304 Because the remaining 11 events had the average RA of 0.6 mm, no more than three  
305 recordings had been observed within event which was limited by 0.2-mm resolution of  
306 TBRGs. Therefore, they could not be categorized and grouped as Event others (Table 2).  
307 Compared with Events A and B, Event C possessed significantly different rainfall  
308 characteristics, e.g., the significantly larger RA (11.7 vs. 4.1 and 5.2 mm) and RD (10.3 vs.  
309 2.5 and 3.6 h) but the significantly smaller  $I_{10}$  (9.5 vs. 15.5 and 12.7 mm $\cdot$ h $^{-1}$ ),  $I_{b10}$  (2.8 vs.

310 7.7 and 9.9 mm·h<sup>-1</sup>), F<sub>b10</sub> (15.4 vs. 19.7 and 21.7 mg·m·s<sup>-1</sup>) and F<sub>e10</sub> (13.4 vs. 17.3 and  
311 16.6 mg·m·s<sup>-1</sup>), the non-significantly smaller I<sub>e10</sub> (2.1 vs. 4.3 and 3.6 mm·h<sup>-1</sup>), F<sub>10</sub> (24.2 vs.  
312 27.8 and 26.6 mg·m·s<sup>-1</sup>) and E (0.4 vs. 0.9 and 1.0), respectively (Table 2).

313 In general, rainfall events were skewedly distributed in terms of RA. The occurrences  
314 of events with a RA<sub>≤</sub>2 mm dominated the experimental period (40.7%), but the events with  
315 RA>20 mm were the greatest contributor to the total RA (28.0%). However, a relatively  
316 equal distribution was noted during events with single (17 events), double (11 events) and  
317 multiple (15 events) rainfall-intensity peaks. Comparatively, the multiple-peak events had  
318 significantly larger rainfall amounts, durations, intensities and raindrop momentums.

### 319 **3.2 Stemflow volume, intensity, funnelling ratio and temporal dynamics**

320 Stemflow variables of *C. korshinskii* and *S. psammophila* showed great inter-event  
321 variations during the experimental period (Fig. 3). *C. korshinskii* had larger SFV, SFI, SFI<sub>10</sub>,  
322 FR, SFD, TLG and TLE (226.6±46.4 mL, 517.5±82.1 mm·h<sup>-1</sup>, 2057.6±399.7 mm·h<sup>-1</sup>,  
323 130.7±8.2, 3.8±0.8 h, 66.2±10.6 min and 20.0±5.3 min, respectively) but smaller TLM  
324 (109.4±20.5 min) than those of *S. psammophila* (172.1±34.5 mL, 367.3±91.1 mm·h<sup>-1</sup>,  
325 1132.2±214.3 mm·h<sup>-1</sup>, 101.6±10.4, 3.4±0.9 h, 54.8±11.7 min, 13.5±17.2 min, and  
326 120.5±22.1 min, respectively) (Table 3). During the 54 events, no negative values were  
327 observed for TLG and TLM but TLE. It indicated that stemflow generally initiated and  
328 maximized after rains started for both species. However, stemflow might be ended before  
329 (negative TLE) and after (positive TLE) rains ceased.

330 Stemflow well synchronized to rains with similar intensity peak shapes, amounts and  
331 positions for both species. These results were vividly demonstrated at representative rains

332 with different intensity peak amounts and RAs, including events on July 17, 2015 (Event A,  
333 20.7 mm), July 29, 2015 (Event B, 7.3 mm), and September 10, 2015 (Event C, 13.3 mm)  
334 (Fig. 4). *C. korshinskii* had larger FR<sub>100</sub> (91.7, 76.1 and 94.0, respectively) than those of *S.*  
335 *psammophila* (32.8, 26.3 and 43.7, respectively) during representative events. It indicated a  
336 comparatively greater ability of converging rains for *C. korshinskii* within event.

337 Stemflow variables varied between rainfall event categories. For Event C in  
338 comparison to Events A and B, *S. psammophila* had significantly larger SFV (435.2 vs.  
339 102.6 and 145.7 mL), SFD (8.3 vs. 1.2 and 3.4 h), TLM (235.8 vs. 64.3 and 93.4 min), FR  
340 (129.1 vs. 77.1 and 91.4), non-significantly larger TLE (20.8 vs. 17.1 and 8.6 min) but  
341 significantly smaller SFI (246.6 vs. 648.1 and 421.5 mm·h<sup>-1</sup>) and SFI<sub>10</sub> (888.4 vs. 1672.7  
342 and 1582.8 mm·h<sup>-1</sup>), respectively (Table 3). SFI decreased at events with increasing  
343 intensity peak amounts as shown at Events A–C. The drop of SFI was offset by the  
344 decreasing I to some extent (Table 2), which might partly explain the increasing trend of  
345 FR from Event A to C. *C. korshinskii* shared similar changing trends of stemflow variables  
346 between event categories with those of *S. psammophila*, except for the non-significantly  
347 smaller TLE (18.5 min) at Event C in contrast to TLE at Event A and B (22.3 and 18.7 min).

348 Funnelling ratio and stemflow intensity negatively related with branch size. *C.*  
349 *korshinskii* and *S. psammophila* had significantly greater FR, SFI, and SFI<sub>10</sub> at the 5–10  
350 mm branches than those at the larger branches (Table 4). For *C. korshinskii*, FR decreased  
351 from 163.7±12.2 at the 5–10-mm branches to 97.7±9.2 at the 18–25-mm branches,  
352 respectively. It was consistent with decreasing SFI (333.8–716.2 mm·h<sup>-1</sup>) at the  
353 corresponding BD categories (Table 4). As branch size increased, *S. psammophila* shared

354 similar decreasing trends of FR (44.2–212.0) and SFI (197.2–738.7 mm·h<sup>-1</sup>), respectively.

### 355 **3.3 Relationships between stemflow variables and rainfall characteristics**

356 *C. korshinskii* and *S. psammophila* had similar correspondence patterns between  
357 rainfall characteristics and stemflow variables. As shown in Fig. 5, the one-to-one  
358 correspondences were observed for SFV and TLE. The larger (or smaller) SFV and TLE  
359 corresponded to the larger (or smaller) RA and RI, respectively. This result demonstrated  
360 the dominant influences of RA and RI on SFV and TLE, respectively. The one-to-two  
361 correspondences was noted for SFD with RD and E. The larger (or smaller) SFD  
362 corresponded to the larger (or smaller) RD and smaller (or larger) E. RA had been  
363 identified as the dominant rainfall characteristic affecting FR based on the analysis for 53  
364 branches of *C. korshinskii* and 98 branches of *S. psammophila* at the same plots during the  
365 same experimental period (Yuan et al., 2017). It seemed that event-based stemflow  
366 production (the volume, duration and efficiency) were strongly influenced by rainfall  
367 characteristics at inter-event scale (the rainfall amount and duration).

368 The one-to-more correspondences were observed for TLM, TLG, SFI and SFI<sub>10</sub>. The  
369 larger (or smaller) TLM corresponded to the smaller (or larger) rainfall characteristics of I,  
370 I<sub>10</sub>, I<sub>b10</sub>, I<sub>e10</sub>, F, F<sub>10</sub>, F<sub>b10</sub> and F<sub>e10</sub>. The same correspondences were applied to the larger (or  
371 smaller) TLG, and the smaller (or larger) SFI and SFI<sub>10</sub>. It seemed that the within-event  
372 stemflow processes (SFI, SFI<sub>10</sub>, TLG and TLM) were strongly affected by rainfall  
373 characteristics at intra-event scale (the rainfall intensity and raindrop momentum).  
374 Therefore, these results indicated that rainfall characteristics influenced stemflow variables  
375 at the corresponding temporal scales. This influence occurred at the inter-event scale

376 between SFV and RA, FR and RA, SFD and RD, and at the intra-event scale for stemflow  
377 time lags (TLG and TLM) and intensities (SFI and SFI<sub>10</sub>) with rainfall intensity (I, I<sub>10</sub>, I<sub>b10</sub>  
378 and I<sub>e10</sub>) and raindrop momentum (F, F<sub>10</sub>, F<sub>b10</sub> and F<sub>e10</sub>). The only exception was noted  
379 between TLE and RI for the mismatched temporal scales.

380 Stepwise regression analysis identified the most influential rainfall characteristics  
381 affecting stemflow intensities and temporal dynamics. RD was the dominant rainfall  
382 characteristics affecting SFD. I<sub>10</sub> significantly affected the TLM of the both species. For *C.*  
383 *korshinskii*, I, I<sub>10</sub> and F were the most influential factors on SFI, SFI<sub>10</sub> and TLG,  
384 respectively. However, for *S. psammophila*, F, F<sub>10</sub> and F<sub>b10</sub> significantly affected SFI, SFI<sub>10</sub>  
385 and TLG, respectively. The results of multiple regression analyses indicated that there  
386 were linear relationships between SFI and I ( $R^2=0.74$ ,  $p<0.01$ ) and SFI<sub>10</sub> and I<sub>10</sub> ( $R^2=0.85$ ,  
387  $p<0.01$ ) for *C. korshinskii* and between SFD and RD for *C. korshinskii* ( $R^2=0.95$ ,  $p<0.01$ )  
388 and *S. psammophila* ( $R^2=0.92$ ,  $p<0.01$ ) (Fig. 6). Moreover, power functional relations were  
389 found between SFI and F ( $R^2=0.82$ ,  $p<0.01$ ), SFI<sub>10</sub> and F<sub>10</sub> ( $R^2=0.90$ ,  $p<0.01$ ) (Fig. 6), TLG  
390 and F<sub>b10</sub> ( $R^2=0.55$ ,  $p<0.01$ ) and TLM and I<sub>10</sub> ( $R^2=0.40$ ,  $p<0.01$ ) (Fig. 7) for *S. psammophila*,  
391 and TLG and F ( $R^2=0.56$ ,  $p <0.01$ ) and TLM and I<sub>10</sub> ( $R^2=0.38$ ,  $p<0.01$ ) (Fig. 7) for *C.*  
392 *korshinskii*. However, there was no significant quantitative relationship between TLE and  
393 RI for *C. korshinskii* ( $R^2=0.005$ ,  $p=0.28$ ) or *S. psammophila* ( $R^2=0.002$ ,  $p=0.78$ ) (Fig. 7).

## 394 **4 Discussion**

### 395 **4.1 Stemflow intensity and funnelling ratio**

396 Stemflow intensity is generally greater than rainfall intensity at different plant life  
397 forms. The xerophytic shrubs of *C. korshinskii* and *S. psammophila* had larger average

398 stemflow intensities than the average rainfall intensity (517.5 and 367.3 mm·h<sup>-1</sup> vs. 4.5  
399 mm·h<sup>-1</sup>). Broadleaf and coniferous species (*Quercus pubescens* Willd. and *Pinus sylvestris*  
400 L., respectively) also have larger maximum stemflow intensities than the maximum rainfall  
401 intensity in north-eastern Spain (Cayuela et al., 2018). The gap between stemflow and  
402 rainfall intensities generally increased as the recording time intervals decreased. While  
403 recording at the 1-h intervals, approximately 20-, 17-, 13- and 2.5-fold greater peak  
404 stemflow intensities had been observed for trees of Cedar, Birch, Douglas Fir and Hemlock,  
405 respectively, at the coastal British Columbia forest (Spencer and Meerveld, 2016). For *C.*  
406 *korshinskii* and *S. psammophila*, in comparison to I<sub>10</sub> (10.9 mm·h<sup>-1</sup>) at 10-min intervals, the  
407 SFI<sub>10</sub> (2057.6 and 1132.2 mm·h<sup>-1</sup>, respectively) was over 103.9-fold greater. The  
408 recordings at 6-min interval indicated a 157-fold larger of stemflow intensity (18840 mm·h<sup>-</sup>  
409 <sup>1</sup>) than rainfall intensity (120 mm·h<sup>-1</sup>) in the cyclone-prone tropical rainforest with  
410 extremely high MAP of 6570 mm (Herwitz, 1986). While calculating the dynamic time  
411 interval between neighbouring tips of TBRG, SFI<sub>i</sub> (10816.2 mm·h<sup>-1</sup>) was 150.2-fold  
412 greater than the corresponding rainfall intensity (72 mm·h<sup>-1</sup>). Therefore, stemflow recorded  
413 at a higher temporal resolution might provide more information into the dynamic nature of  
414 stemflow and real-time responses to rainfall characteristics within events.

415 Greater stemflow intensity than rainfall intensity is hydrologically significant at  
416 terrestrial ecosystems. This scenario indicates the convergence of the canopy-intercepted  
417 rains into the limited area around trunk or branch bases within a certain time period, i.e.,  
418 8.0% and 3.5% of rains being directed to the trunk base only accounting for 0.3% and 0.4%  
419 of plot area in the open rainforest (Germer et al., 2010) and undisturbed lowland tropical

420 rainforest (Manfroi et al., 2004), respectively. Besides, FR, which compared SFV with RA  
421 that would have been collected at the same area as the basal area at an event scale (Herwitz,  
422 1986), is commonly applied to assess the convergence effect via stemflow volume, rainfall  
423 amount and basal area (Carlyle-Moses et al., 2010; Siegert and Levia, 2014; Fan et al.,  
424 2015; Yang et al., 2019). If FR is greater than 1, more water is collected at the trunk or  
425 branch base than at the clearings. Both methods successfully quantified the convergence  
426 effects of stemflow. However, the former provided a possibility to assess it at high temporal  
427 resolutions within event.

428       This study established the quantitative connection between FR and stemflow intensity  
429 for the first time. As per Equation 14 and the average stemflow and rainfall intensities  
430 listed at Table 2 and 3, FR could be estimated to be 115.0 and 81.6 for *C. korshinskii* and *S.*  
431 *psammophila*, respectively. Those results approximately agreed with FR of 173.3 and 69.3  
432 (Yuan et al., 2017) and 124.9 and 78.2 (Yang et al., 2019) for the two species by applying  
433 the traditional calculation based on SFV and RA (Herwitz, 1986). As branch size increased,  
434 FR of *C. korshinskii* decreased from 163.7 at the 5–10-mm branches to 97.7 at the 18–  
435 25-branches. The decreasing trend of FR of *S. psammophila* were also noted in the range of  
436 44.2–212.0 with increasing BD. The negative relation between BD and FR agreed with the  
437 reports for trees and babassu palms in an open tropical rainforest in Brazil (Germer et al.,  
438 2010), the mixed-species coastal forest at British Columbia of Canada (Spencer and  
439 Meerveld, 2016), for trees (*Pinus tabuliformis* and *Armeniaca vulgaris*) and shrubs (*C.*  
440 *korshinskii* and *S. psammophila*) on the Loess Plateau of China (Yang et al., 2019). It might  
441 be partly explained by the decreasing stemflow intensities with increasing branch size as

442 per Equation 14. Our results found that SFI decreased from 716.2 to 333.8 for *C.*  
443 *korshinskii*, and 738.7 to 197.2 for *S. psammophila* as branch size increased (Table 4). It  
444 well justified the importance of branch size on stemflow intensity. Associated with the  
445 infiltration rate, the stemflow-induced hydrological process might be strongly affected, i.e.,  
446 soil moisture recharge, Hortonian overland flow (Herwitz, 1986), Saturation overland flow  
447 (Germer et al., 2010), soil erosion (Liang et al., 2011), nutrient leaching (Corti et al., 2019),  
448 etc. Therefore, more attention should be paid to tree/branch size and size-related stand age  
449 at future studies while modeling the stemflow-induced terrestrial hydrological fluxes.

450 The importance had been addressed to study the funnelling ratio at the stand scale  
451 (Carlyle-Moses et al., 2018); however, it had not been adequately studied at the intra-event  
452 scale. This study calculated the average funnelling ratio at the event base and the 100-s  
453 intervals after rain began. Thus, the convergence effect of stemflow could be better  
454 understood at the inter-/intra-event scales. Our results found that  $FR_{100}$  were over 1.8-fold  
455 greater than FR of *C. korshinskii* (282.7 vs. 130.7) and *S. psammophila* (203.4 vs. 101.6),  
456 respectively. It indicated that funnelling ratio fluctuated dramatically within event.  
457 Therefore, computing FR at event and ignoring it at high temporal resolutions within event  
458 might underestimate the eco-hydrological significance of stemflow.

459 In general, stemflow intensity highly related to funnelling ratio. For addressing its  
460 eco-hydrological importance, stemflow intensity should be precisely defined. It had been  
461 expressed as the stemflow volume per basal area of branches/trunks per unit time with the  
462 unit of  $\text{mm}\cdot\text{h}^{-1}$  (Herwitz, 1986; Spencer and Meerveld, 2016) and  $\text{mm}\cdot 5 \text{ min}^{-1}$  (Cayuela et  
463 al., 2018). However, stemflow intensity had also been described as stemflow volume per



464 unit time with the unit of  $L \cdot \text{week}^{-1}$  (Schimmack et al., 1993) and  $L \cdot \text{h}^{-1}$  (Liang et al., 2011;  
465 Germer et al., 2013). We highly recommended the former definition. Because of its highly  
466 spatial-related (Herwitz, 1986; Liang et al., 2011; 2014), the eco-hydrological significance  
467 of stemflow would be underestimated by ignoring the basal area, over which stemflow was  
468 received. Moreover, as per this definition, stemflow intensity quantitatively connected with  
469 funnelling ratio via Equation 14. Thus, funnelling ratio could be used to assess the  
470 convergence effect of stemflow at both inter- and intra-event scales.

#### 471 **4.2 Stemflow temporal dynamics**

472 Stemflow well synchronized to the rains. It agreed with the report of Levia et al.  
473 (2010), who demonstrated a marked synchronicity between SFV and RA in 5-min intervals  
474 for *Fagus grandifolia*. The duration and time lags to rains were critical to describe  
475 stemflow temporal dynamics. Our results indicated that in comparison to *S. psammophila*,  
476 *C. korshinskii* takes a longer time to initiate (66.2 vs. 54.8 min), end (20.0 vs. 13.5 min)  
477 and produce stemflow (3.8 vs. 3.4 h) but a shorter time to maximize stemflow (109.4 vs.  
478 120.5 min, respectively). Moreover, the TLMs of both species were in the range of the  
479 TLMs for *S. psammophila* (20–210 min) in the Mu Us desert of China (Yang, 2010).

480 Varying TLGs were documented for different species. Approximately 15 min, 1 h and  
481 1.5 h were needed to initiate the stemflow of palms (Germer, 2010), pine trees and oak  
482 trees (Cayuela et al., 2018), respectively. In addition, an almost instantaneous start of  
483 stemflow had also been observed as rain began for *Quercus rubra* (Durocher, 1990), *Fagus*  
484 *grandifolia* and *Liriodendron tulipifera* (Levia et al., 2010). Compared to the positive TLE  
485 dominating xerophytic shrubs, the TLE greatly varied with tree species. TLE was as much

486 as 48 h for Douglas fir, oak and redwood in California, USA (Reid and Levia, 2009), and  
487 almost 11 h for palm trees in Brazil (Germer, 2010). However, for sweet chestnut and oak,  
488 almost no stemflow continued when rains ceased in Bristol, England (Durocher, 1990).  
489 These scenarios might occur due to the sponge effect of the canopy surface (Germer, 2010),  
490 which buffered stemflow generation, maximization and cessation before saturation. These  
491 conclusions were consistent with the smaller stemflow intensities of *C. korshinskii* and *S.*  
492 *psammophila* than the rainfall intensity when rain began, as part of the rains was used to  
493 wet canopies (Fig. 4). The hydrophobic bark traits benefited stemflow initiation with the  
494 limited time lags to rains. In contrast, the hydrophilic bark traits were conducive for  
495 continuing stemflow after rain ceased, which kept the preferential flow paths wetter for  
496 longer time periods (Levia and Germer, 2015). As a result, it took time to transfer  
497 intercepted rains from the leaf, branch and trunk to the base. This process strongly affects  
498 the stemflow volume, intensity and loss as evaporation.

499 The dynamics of intra-event rainfall intensity complicated the stemflow time lags to  
500 rains. A 1-h lag to begin and stop stemflow with the beginning and ending of rains had been  
501 observed for ashe juniper trees during high-intensity events, but no stemflow was generated  
502 at low-intensity storms (Owens et al., 2006). Rainfall intensity was an important dynamic  
503 rainfall characteristic affecting stemflow volume. Owens et al. (2006) found the most  
504 significant difference between various rainfall intensities located in the stemflow patterns  
505 other than throughfall and interception loss. During events with a front-positioned, single  
506 rainfall-intensity peak, *S. psammophila* maximized stemflow in a shorter time than *C.*  
507 *korshinskii* did in the Mu Us desert (30 and 50 min) (Yang, 2010). These results highlighted

508 the amounts and occurrence time of rainfall-intensity peak affecting the stemflow process,  
509 which was consistent with the finding of Dunkerley (2014b).

510 Raindrops presented rainfall characteristics at finer temporal-spatial scales. They were  
511 usually ignored because rains were generally regarded as a continuum rather than a discrete  
512 process consisting of individual raindrops of various sizes, velocities, inclination angles  
513 and kinetic energies. Raindrops hit the canopy surface and created splashes at different  
514 canopy layers (Bassette and Bussière, 2008; Li et al., 2016). This process accelerated  
515 canopy wetting and increased water supply for stemflow production. Therefore, raindrop  
516 momentum was introduced in this study to represent the comprehensive effects of raindrop  
517 attributes. Our results indicated that raindrop momentum was sensitive to predicting the  
518 variations in stemflow intensity and temporal dynamics with significant linear or power  
519 functional relations (Figs. 6 and 7). Compared with the importance of rainfall intensity for  
520 *C. korshinskii*, raindrop momentum more significantly affected the stemflow process of *S.*  
521 *psammophila*. This result might be related to the larger canopy size and height of *S.*  
522 *psammophila* ( $21.4 \pm 5.2 \text{ m}^2$  and  $3.5 \pm 0.2 \text{ m}$ ) than that of *C. korshinskii* ( $5.1 \pm 0.3 \text{ m}^2$  and  
523  $2.1 \pm 0.2 \text{ m}$ , respectively). More layers were available within canopies of *S. psammophila* to  
524 intercept the splashes created by raindrop striking (Bassette and Bussière, 2008; Li et al.,  
525 2016), thus shortening the paths and having more water supply for stemflow production.

#### 526 **4.3 Temporal-dependent influence of rainfall characteristics**

527 This study discussed stemflow variables and rainfall characteristics at inter-/intra-event  
528 scales. We found that rainfall characteristics affected stemflow variables at the  
529 corresponding temporal scales. RA and RD controlled SFV, FR and SFD, respectively, at

530 the inter-event scale. However, stemflow intensity (e.g., SFI and SFI<sub>10</sub>) and temporal  
531 dynamics (e.g., TLG and TLM) were strongly influenced by rainfall intensity (e.g., I, I<sub>10</sub>  
532 and I<sub>b10</sub>) and raindrop momentum (e.g., F, F<sub>10</sub> and F<sub>b10</sub>) at the intra-event scales. These  
533 results were verified by the well-fitting linear or power functional equations among them  
534 (Figs. 6 and 7). Furthermore, the influences of rainfall intensity and raindrop momentum on  
535 stemflow process were species-specific. In contrast to the significance of rainfall intensity  
536 on the stemflow process of *C. korshinskii*, raindrop momentum imposed a greater influence  
537 on the stemflow process of *S. psammophila*.

538 In general, rainfall characteristics had temporal-dependent influences on the  
539 corresponding stemflow variables. The only exception was found between TLE and RI. RI  
540 tightly corresponded to TLE for both species tested by the MCA, but there was no  
541 significant quantitative relationship between them ( $R^2=0.005$ ,  $p=0.28$  for *C. korshinskii*,  
542 and  $R^2=0.002$ ,  $p=0.78$  for *S. psammophila*). This result might be related to the mismatched  
543 temporal scales between TLE and RI. TLE represented stemflow temporal dynamics at the  
544 intra-event scale, while RI was the interval times between neighbouring rains at the  
545 inter-event scale. The mismatched temporal scales might also partly explain the  
546 long-standing debates on the controversial positive, negative and even no significant  
547 influences of rainfall intensity (depicting raining process at 5 min, 10 min, 60 min, etc.) on  
548 event-based stemflow volume (Owens et al., 2006; André et al., 2008; Zhang et al., 2015).

## 549 **5 Conclusions**

550 Stemflow intensity and temporal dynamics are important in depicting the stemflow  
551 process and its interactions with rainfall characteristics within events. We categorized

552 stemflow variables into the volume, intensity, funnelling ratio and temporal dynamics, thus  
553 to representing the stemflow yield, efficiency and process. Funnelling ratio had been  
554 calculated as the ratio between stemflow and rainfall intensities for the first time. It enabled  
555 it to assess the convergence of stemflow at the inter-/intra-event scales. Over 1.8-fold  
556 greater  $FR_{100}$  were noted than FR at representative events for *C. korshinskii* and *S.*  
557 *psammophila*, respectively. The eco-hydrological significance of stemflow might be  
558 underestimated by ignoring stemflow production at high temporal resolutions within event.  
559 FR decreased with increasing branch size of both species. It could be partly explained by  
560 the decreasing trends of SFI as branch size increased. The influences of rainfall  
561 characteristics were quantified at a fine temporal scale by introducing  $SFI_i$ ,  $FR_{100}$ , raindrop  
562 momentum, rainfall-intensity peak amounts and intra-event positions. The results indicated  
563 that rainfall characteristics had temporal-dependent influences on stemflow variables. RA  
564 and RD controlled SFV, FR and SFD at the inter-event scale. Rainfall intensity and  
565 raindrop momentum significantly affected stemflow intensity and time lags to rains at the  
566 intra-event scale except for TLE. Although there was tight correspondence between TLE  
567 and RI by MCA, there was no significant quantitative relationship ( $R^2 < 0.005$ ,  $p > 0.28$ ) due  
568 to the mismatched temporal scale between them. These findings advance our understanding  
569 of the stemflow process and its influential mechanism and help model the critical  
570 process-based hydrological fluxes of terrestrial ecosystems.

571

572 *Data availability.* The data collected in this study are available upon request to the authors.

573

574 *Author contributions.* GYG and CY set up the research goals and designed field  
575 experiments. CY measured and analyzed the data. GYG and BJF provided the financial  
576 support for the experiments, and supervised the execution. CY created the figures and  
577 wrote the original draft. GYG, BJF, DMH, XWD and XHW reviewed and edited the draft  
578 in several rounds of revision.

579

580 *Competing interests.* The authors declare that they have no conflict of interest.

581

582 *Acknowledgements.* This research was sponsored by the National Natural Science  
583 Foundation of China (nos. 41390462, 41822103 and 41901038), the National Key  
584 Research and Development Program of China (no. 2016YFC0501602), the Chinese  
585 Academy of Sciences (no. QYZDY-SSW-DQC025), the Youth Innovation Promotion  
586 Association CAS (no. 2016040), and the China Postdoctoral Science Foundation (no.  
587 2018M633427). We appreciate Prof. D. F. Levia in University of Delaware for reviewing  
588 and improving this manuscript. Thanks to Liwei Zhang for the catchment GIS mapping.  
589 Special thanks are given to Shenmu Erosion and Environment Research Station for  
590 experimental support to this research.

591

## 592 **Appendix**

593

### List of symbols

| Abbreviation | Descriptions      | Unit            |
|--------------|-------------------|-----------------|
| a.s.l.       | above sea level   | NA              |
| BA           | Branch angle      | °               |
| BBA          | Branch basal area | mm <sup>2</sup> |
| BD           | Branch diameter   | mm              |

|                   |                                                                       |                                                |
|-------------------|-----------------------------------------------------------------------|------------------------------------------------|
| BL                | Branch length                                                         | cm                                             |
| D                 | Diameter of rain drop                                                 | mm                                             |
| $e_s$             | Saturation vapor pressure                                             | kPa                                            |
| E                 | Evaporation coefficient                                               | unitless                                       |
| F                 | Average raindrop momentum in the vertical direction of incident event | $\text{mg} \cdot \text{m} \cdot \text{s}^{-1}$ |
| $F_0$             | Average raindrop momentum of incident event                           | $\text{mg} \cdot \text{m} \cdot \text{s}^{-1}$ |
| $F_{10}$          | The 10-min maximum raindrop momentum                                  | $\text{mg} \cdot \text{m} \cdot \text{s}^{-1}$ |
| $F_{b10}$         | Average raindrop momentum at the first 10 min                         | $\text{mg} \cdot \text{m} \cdot \text{s}^{-1}$ |
| $F_{e10}$         | Average raindrop momentum at the last 10 min                          | $\text{mg} \cdot \text{m} \cdot \text{s}^{-1}$ |
| FR                | Average funnelling ratio of incident event                            | unitless                                       |
| FR <sub>100</sub> | Funnelling ratio at the 100-s intervals after rain begins             | unitless                                       |
| H                 | Air relative humidity                                                 | %                                              |
| I                 | Average rainfall intensity of incident event                          | $\text{mm} \cdot \text{h}^{-1}$                |
| $I_{10}$          | The 10-min maximum rainfall intensity                                 | $\text{mm} \cdot \text{h}^{-1}$                |
| $I_{b10}$         | Average rainfall intensity at the first 10-min of incident event      | $\text{mm} \cdot \text{h}^{-1}$                |
| $I_{e10}$         | Average rainfall intensity at the last 10-min of incident event       | $\text{mm} \cdot \text{h}^{-1}$                |
| IW <sub>A</sub>   | The adjusted inflow water at TBRG                                     | mm                                             |
| IW <sub>R</sub>   | The recorded inflow water at TBRG                                     | mm                                             |
| LA                | Leaf area of individual branch                                        | $\text{cm}^2$                                  |
| MAP               | Mean annual precipitation                                             | mm                                             |
| MCA               | Multiple correspondence analysis                                      | NA                                             |
| NA                | Not applicable                                                        | NA                                             |
| $p$               | Level of significance                                                 | NA                                             |
| $R^2$             | Coefficient of determination                                          | NA                                             |
| RA                | Rainfall amount                                                       | mm                                             |
| RD                | Rainfall duration                                                     | h                                              |
| RI                | Rainfall interval                                                     | h                                              |
| SE                | Standard error                                                        | NA                                             |
| SFD               | Stemflow duration from its beginning to ending                        | h                                              |
| SFI               | Average stemflow intensity of incident event                          | $\text{mm} \cdot \text{h}^{-1}$                |
| SFI <sub>10</sub> | The 10-min maximum stemflow intensity of incident event               | $\text{mm} \cdot \text{h}^{-1}$                |
| SFI <sub>i</sub>  | Instantaneous stemflow intensity                                      | $\text{mm} \cdot \text{h}^{-1}$                |
| SF <sub>RG</sub>  | Stemflow depth recorded by TBRG                                       | mm                                             |
| SFV               | Stemflow volume                                                       | mL                                             |
| $t_i$             | Time intervals between neighboring tips                               | h                                              |
| T                 | Air temperature                                                       | °C                                             |
| TBRG              | Tipping bucket rain gauge                                             | NA                                             |
| TLE               | Time lag of stemflow ending to rainfall ceasing                       | min                                            |
| TLG               | Time lag of stemflow generation to rainfall beginning                 | min                                            |
| TLM               | Time lag of stemflow maximization to rainfall beginning               | min                                            |
| $v$               | Terminal velocity of rain drop                                        | $\text{m} \cdot \text{s}^{-1}$                 |
| VPD               | Vapor pressure deficit                                                | kPa                                            |
| WS                | Wind speed                                                            | $\text{m} \cdot \text{s}^{-1}$                 |
| $\rho$            | Density of freshwater at standard atmospheric pressure and 20°C       | $\text{g} \cdot \text{cm}^{-3}$                |

594

595 **References**

596 André, F., Jonard, M. and Ponette, Q.: Influence of species and rain event characteristics on  
597 stemflow volume in a temperate mixed oak-beech stand, *Hydrol. Process.*, 22, 4455–  
598 4466. <https://doi.org/10.1002/hyp.7048>, 2008.

599 Bassette, C. and Bussière, F.: Partitioning of splash and storage during raindrop impacts on  
600 banana leaves, *Agr., Forest Meteorol.*, 148, 991–1004,  
601 <https://doi.org/10.1016/j.agrformet.2008.01.016>, 2008.

602 Bittar, T.B., Pound, P., Whitetree, A., Moore, L.D. and van Stan John, T.: Estimation of  
603 throughfall and stemflow bacterial flux in a subtropical oak-cedar forest. *Geophys. Res.*  
604 *Let.*, 45, 1410–1418, <https://doi.org/10.1002/2017GL075827>, 2018.

605 Brandt, C.J.: Simulation of the size distribution and erosivity of raindrops and throughfall  
606 drops. *Earth. Surf. Proc. Land.*, 15, 687–698, <https://doi.org/10.1002/esp.3290150803>,  
607 1990.

608 Bundt, M., Widmer, F., Pesaro, M., Zeyer, J. and Blaser, P.: Preferential flow paths:  
609 biological ‘hot spots’ in soils. *Soil. Biol. Biochem.*, 33, 729–738,  
610 [https://doi.org/10.1016/S0038-0717\(00\)00218-2](https://doi.org/10.1016/S0038-0717(00)00218-2), 2001.

611 Carlyle-Moses, D.E., Iida, S.I., Germer, S., Llorens, P., Michalzik, B., Nanko, K., Tischer,  
612 A. and Levia, D.F.: Expressing stemflow commensurate with its ecohydrological  
613 importance, *Adv. Water Resources*, 121, 472–479,  
614 <https://doi.org/10.1016/j.advwatres.2018.08.015>, 2018.

615 Carlyle-Moses, D.E. and Price, A.G.: Growing-season stemflow production within a



616 deciduous forest of southern Ontario, *Hydrol. Process.*, 20, 3651–3663,  
617 <https://doi.org/10.1002/hyp.6380>, 2006.

618 Carlyle-Moses, D.E. and Schooling, J.: Tree traits and meteorological factors influencing  
619 the initiation and rate of stemflow from isolated deciduous trees, *Hydrol. Process.*, 29,  
620 4083–4099, <https://doi.org/10.1002/hyp.10519>, 2015.

621 Carlyle-Moses, D.E., Park, A.D. and Cameron, J.L.: Modelling rainfall interception loss in  
622 forest restoration trials in Panama, *Ecohydrology*, 3, 272–283,  
623 <https://doi.org/10.1002/eco.105>, 2010.

624 Cayuela, C., Llorens, P., Sánchez-Costa, E., Levia, D.F. and Latron, J.: Effect of biotic and  
625 abiotic factors on inter- and intra-event variability in stemflow rates in oak and pine  
626 stands in a Mediterranean mountain area, *J. Hydrol.*, 560, 396–406,  
627 <https://doi.org/10.1016/j.jhydrol.2018.03.050>, 2018.

628 Corti, G., Agnelli, A., Cocco, S., Cardelli, V., Masse, J. and Courchesne, F.: Soil affects  
629 throughfall and stemflow under Turkey oak (*Quercus cerris* L.), *Geoderma*, 333, 43–56,  
630 <https://doi.org/10.1016/j.geoderma.2018.07.010>, 2019.

631 Dawoe, E.K., Barnes, V.R. and Oppong, S.K.: Spatio-temporal dynamics of gross rainfall  
632 partitioning and nutrient fluxes in shaded-cocoa (*Theobroma cocoa*) systems in a  
633 tropical semi-deciduous forest, *Agroforst. Syst.*, 92, 397–413,  
634 <https://doi.org/10.1007/s10457-017-0108-3>, 2018.

635 Dunkerley, D.L.: Stemflow production and intrastorm rainfall intensity variation: an  
636 experimental analysis using laboratory rainfall simulation, *Earth. Surf. Proc. Land.*, 39,  
637 1741–1752, <https://doi.org/10.1002/esp.3555>, 2014.

638 Dunkerley, D.L.: Stemflow on the woody parts of plants: dependence on rainfall intensity  
639 and event profile from laboratory simulations, *Hydrol. Process.*, 28, 5469–5482,  
640 <https://doi.org/10.1002/hyp.10050>, 2014.

641 Dunkerley, D.L.: Rainfall intensity bursts and the erosion of soils: an analysis highlighting  
642 the need for high temporal resolution rainfall data for research under current and future  
643 climates, *Earth Surf. Dynam.*, 7, 345–360, <https://doi.org/10.5194/esurf-7-345-2019>,  
644 2019.

645 Durocher, M.G.: Monitoring spatial variability of forest interception, *Hydrol. Process.*, 4,  
646 215–229, <https://doi.org/10.1002/hyp.3360040303>, 1990.

647 Fan, J.L., Baumgartl, T., Scheuermann, A. and Lockington, D.A.: Modeling effects of  
648 canopy and roots on soil moisture and deep drainage. *Vadose. Zone. J.*, 14, 1–18,  
649 <https://doi.org/10.2136/vzj2014.09.0131>, 2015.

650 Firn, R.: Plant intelligence: an alternative point of view, *Ann. Bot.*, 93, 345–351,  
651 <https://doi.org/10.1093/aob/mch058>, 2004.

652 Gao, X.D., Zhao, X.N., Pan, D.L., Yu, L.Y. and Wu, P.T.: Intra-storm time stability analysis  
653 of surface soil water content, *Geoderma*, 352, 33–37,  
654 <https://doi.org/10.1016/j.geoderma.2019.06.001>, 2019.

655 Garbelotto, M.M., Davidson, J.M., Ivors, K., Maloney, P.E., Hüberli, D., Koike, S.T. and  
656 Rizzo, D.M.: Non-oak native plants are main hosts for sudden oak death pathogen in  
657 California, *Calif. Agric*, 57, 18–23, <https://doi.org/10.3733/ca.v057n01p18>, 2003.

658 Germer, S.: Development of near-surface perched water tables during natural and artificial  
659 stemflow generation by babassu palms, *J. Hydrol.*, 507, 262–272,

660 <http://dx.doi.org/10.1016/j.jhydrol.2013.10.026>, 2013.

661 Germer, S., Werther, L. and Elsenbeer, H.: Have we underestimated stemflow? Lessons  
662 from an open tropical rainforest, *J. Hydrol.*, 395, 169–179,  
663 <https://doi.org/10.1016/j.jhydrol.2010.10.022>, 2010.

664 Giacomini, A. and Trucchi, P.: Rainfall interception in a beech coppice (Acquerino, Italy). *J.*  
665 *Hydrol.*, 137, 141–147, [https://doi.org/10.1016/0022-1694\(92\)90052-W](https://doi.org/10.1016/0022-1694(92)90052-W), 1992.

666 Groisman, P.Y. and Legates, D.R.: The accuracy of United States precipitation data, *B. Am.*  
667 *Meteorol. Soc.*, 75, 215–227,  
668 [https://doi.org/10.1175/1520-0477\(1994\)075<0215:TAOUSP>2.0.CO;2](https://doi.org/10.1175/1520-0477(1994)075<0215:TAOUSP>2.0.CO;2), 1994.

669 Hair, J.F., Anderson, R.E., Tatham, R.L. and Black, W.C.: *Multivariate Data Analysis*,  
670 fourth ed. Prentice Hall College Division, 745 p, 1995.

671 Herwitz, S.R.: Infiltration-excess caused by Stemflow in a cyclone-prone tropical rainforest,  
672 *Earth Surf. Proc. Land*, 11, 401–412, <https://doi.org/10.1002/esp.3290110406>, 1986.

673 Hill, T. and Lewicki, P.: *Statistics: Methods and Applications*. Statsoft, Tulsa, 800 p, 2007.

674 Hu, R., Wang, X.P., Zhang, Y.F., Shi, W., Jin, Y.X. and Chen, N.: Insight into the influence  
675 of sand-stabilizing shrubs on soil enzyme activity in a temperate desert, *Catena*, 137,  
676 526–535, <http://dx.doi.org/10.1016/j.catena.2015.10.022>, 2016.

677 Iida, S., Levia, D.F., Shimizu, A., Shimizu, T., Tamai, K., Nobuhiro, T., Kabeya, N.,  
678 Noguchi, S., Sawano, S. and Araki, M.: Intrastorm scale rainfall interception dynamics  
679 in a mature coniferous forest stand, *J. Hydrol.*, 548, 770–783,  
680 <https://doi.org/10.1016/j.jhydrol.2017.03.009>, 2017.

681 Iida, S., Shimizu, T., Kabeya, N., Nobuhiro, T., Tamai, K., Shimizu, A., Ito, E., Ohnuki, Y.,

682 Abe, T., Tsuboyama, Y., Chann, S. and Keth, N.: Calibration of tipping-bucket flow  
683 meters and rain gauges to measure gross rainfall, throughfall, and stemflow applied to  
684 data from a Japanese temperate coniferous forest and a Cambodian tropical deciduous  
685 forest, *Hydrol. Process.*, 26, 2445–2454, <https://doi.org/10.1002/hyp.9462>, 2012.

686 Jia, X.X., Shao, M.A., Wei, X.R. and Wang, Y. Q.: Hillslope scale temporal stability of soil  
687 water storage in diverse soil layers, *J. Hydrol.*, 498, 254–264,  
688 <https://doi.org/10.1016/j.jhydrol.2013.05.042>, 2013.

689 Johnson, M.S. and Lehmann, J.: Double-funneling of trees: Stemflow and root-induced  
690 preferential flow, *Ecoscience*, 13, 324–333,  
691 <https://doi.org/0.2980/i1195-6860-13-3-324.1>, 2006.

692 Kéfi, S., Rietkerk, M., Alados, C.L., Pueyo, Y., Papanastasis, V.P., ElAich, A. and De Ruiter,  
693 P.C.: Spatial vegetation patterns and imminent desertification in Mediterranean arid  
694 ecosystems, *Nature*, 449, 213–217, <https://doi.org/10.1038/nature06111>, 2007.

695 Kimble, P.D.: Measuring the momentum of throughfall drops and raindrops. Master Thesis.  
696 Western Kentucky University, Bowling Green, 126 pp, 1996.

697 Levia, D.F. and Germer, S.: A review of stemflow generation dynamics and  
698 stemflow-environment interactions in forests and shrublands, *Rev. Geophys.*, 53, 673-  
699 714, 2015, <https://doi.org/10.1002/2015RG000479>, 2015.

700 Levia, D.F., van Stan, J.T., Mage, S.M. and Kelley-Hauske, P.W.: Temporal variability of  
701 stemflow volume in a beech-yellow poplar forest in relation to tree species and size, *J.*  
702 *Hydrol.*, 380, 112–120, <https://doi.org/10.1016/j.jhydrol.2009.10.028>, 2010.

703 Liang, W.L., Kosugi, K. and Mizuyama, T.: Soil water dynamics around a tree on a

704 hillslope with or without rainwater supplied by stemflow, *Water Resour. Res.*,  
705 <https://doi.org/10.1029/2010WR009856>, 2011.

706 Liang, W.L., Kosugi, K. and Mizuyama, T.: Soil water redistribution processes around a  
707 tree on a hillslope: the effect of stemflow on the drying process, *Ecohydrology*, 8,  
708 1381–1395, <https://doi.org/10.1002/eco.1589>, 2014.

709 Li X., Xiao, Q.F., Niu, J.Z., Dymond, S., van Doorn, N.S., Yu, X.X., Xie, B.Y., Lv, X.Z.,  
710 Zhang, K.B. and Li, J.: Process-based rainfall interception by small trees in Northern  
711 China: The effect of rainfall traits and crown structure characteristics, *Agric. For.*  
712 *Meteorol.*, 218–219, 65–73, <https://doi.org/10.1016/j.agrformet.2015.11.017>, 2016.

713 Li, X.Y., Liu, L.Y., Gao, S.Y., Ma, Y.J. and Yang, Z.P.: Stemflow in three shrubs and its  
714 effect on soil water enhancement in semiarid loess region of China, *Agric. For.*  
715 *Meteorol.*, 148, 1501–1507, <https://doi.org/10.1016/j.agrformet.2008.05.003>, 2008.

716 Li, Y.Y., Chen, W.Y., Chen, J.C. and Shi, H.: Contrasting hydraulic strategies in *Salix*  
717 *psammophila* and *Caragana korshinskii* in the southern Mu Us Desert, China, *Ecol.*  
718 *Res.*, 31, 869–880, <https://doi.org/10.1007/s11284-016-1396-1>, 2016.

719 Liu, Y.X., Zhao, W.W., Wang, L.X., Zhang, X., Daryanto, S. and Fang, X.N.: Spatial  
720 variations of soil moisture under *Caragana korshinskii* kom. from different  
721 precipitation zones: field based analysis in the Loess Plateau, China, *Forests*, 7,  
722 <https://doi.org/10.3390/f7020031>, 2016.

723 Magliano, P.N., Whitworth-Hulse, J.I. and Baldi, G.: Interception, throughfall and stemflow  
724 partition in drylands: Global synthesis and meta-analysis, *J. Hydrol.*, 568, 638–645,  
725 <https://doi.org/10.1016/j.jhydrol.2018.10.042>, 2019.

726 Manfroi, O.J., Koichiro, K., Nobuaki, T., Masakazu, S., Nakagawa, M., Nakashizuka, T.  
727 and Chong, L.: The stemflow of trees in a Bornean lowland tropical forest, *Hydrol.*  
728 *Process.*, 18, 2455–2474, <https://doi.org/10.1002/hyp.1474>, 2004.

729 Martinez-Meza, E. and Whitford, W.: Stemflow, throughfall and channelization of  
730 stemflow by roots in three Chihuahuan desert shrubs, *J. Arid Environ.*, 32, 271–287,  
731 <https://doi.org/10.1006/jare.1996.0023>, 1996.

732 McClain, M.E., Boyer, E.W., Dent, C.L., Gergel, S.E., Grimm, N.B., Groffman, P.M., Hart,  
733 S.C., Harvey, J.W., Johnston, C.A. and Mayorga, E.: Biogeochemical hot spots and  
734 hot moments at the interface of terrestrial and aquatic ecosystems, *Ecosystems*, 6,  
735 301–312, <https://doi.org/10.1007/s10021-003-0161-9>, 2003.

736 Návar, J.: Stemflow variation in Mexico’s northeastern forest communities: Its contribution  
737 to soil moisture content and aquifer recharge, *J. Hydrol.*, 408, 35–42,  
738 <https://doi.org/10.1016/j.jhydrol.2011.07.006>, 2011.

739 Owens, M.K., Lyons, R.K. and Alejandro, C.L.: Rainfall partitioning within semiarid  
740 juniper communities: effects of event size and canopy cover, *Hydrol. Process.*, 20,  
741 3179–3189, <https://doi.org/10.1002/hyp.6326>, 2006.

742 Reid, L.M. and Lewis, J.: Rates, timing, and mechanisms of rainfall interception loss in a  
743 coastal redwood forest, *J. Hydrol.*, 375, 459–470,  
744 <https://doi.org/10.1016/j.jhydrol.2009.06.048>, 2009.

745 Schimmack, W., Förster, H., Bunzl, K., and Kreutzer, K.: Deposition of radiocesium to the  
746 soil by stemflow, throughfall and leaf-fall from beech trees, *Radiat. Environ. Bioph.*,  
747 32, 137–150, <https://doi.org/10.1007/bf01212800>, 1993.

748 Siegert, C.M. and Levia, D.F.: Seasonal and meteorological effects on differential stemflow  
749 funneling ratios for two deciduous tree species, *J. Hydrol.*, 519, 446–454,  
750 <https://doi.org/10.1016/j.jhydrol.2014.07.038>, 2014.

751 Spencer, S.A. and van Meerveld, H.J.: Double funnelling in a mature coastal British  
752 Columbia forest: spatial patterns of stemflow after infiltration, *Hydrol. Process.*, 30,  
753 4185–4201, <https://doi.org/10.1002/hyp.10936>, 2016.

754 Sprenger, M., Stumpp, C., Weiler, M., Aeschbach, W., Allen, S.T., Benettin, P., Dubbert, M.,  
755 Hartmann, A., Hrachowitz, M., Kirchner, J.W., McDonnell, J.J., Orłowski, N., Penna,  
756 D., Pfahl, S., Rinderer, M., Rodriguez, N., Schmidt, M. and Werner, C.: The  
757 Demographics of Water: A Review of Water Ages in the Critical Zone, *Rev. Geophys.*,  
758 57, 1–35, <https://doi.org/10.1029/2018RG000633>, 2019.

759 Staelens, J., De Schrijver, A., Verheyen, K. and Verhoest N.E.: Rainfall partitioning into  
760 throughfall, stemflow, and interception within a single beech (*Fagus sylvatica* L.)  
761 canopy: influence of foliation, rain event characteristics, and meteorology, *Hydrol.*  
762 *Process.*, 22, 33–45, <https://doi.org/10.1002/hyp.6610>, 2008.

763 Teachey, M.E., Pound, P., Ottesen, E.A. and van Stan, J.T.: Bacterial community  
764 composition of throughfall and stemflow, *Front. Plant. Sci.*, 1, 1–6,  
765 <https://doi.org/10.3389/ffgc.2018.00007>, 2018.

766 Uijlenhoet, R. and Sempere Torres, D.: Measurement and parameterization of rainfall  
767 microstructure, *J. Hydrol.*, 328, 1, 1–7, <https://doi.org/10.1016/j.jhydrol.2005.11.038>,  
768 2006.

769 van Stan, J.T. and Levia, D.F.: Inter- and intraspecific variation of stemflow production

770 from *Fagus grandifolia* Ehrh. (American beech) and *Liriodendron tulipifera* L.  
771 (yellow poplar) in relation to bark microrelief in the eastern United States,  
772 *Ecohydrology*, 3, 11–19, <https://doi.org/10.1002/eco.83>, 2010.

773 van Stan, J.T., Siegert, C.M., Levia D.F. and Scheick, C.E.: Effects of wind-driven rainfall  
774 on stemflow generation between codominant tree species with differing crown  
775 characteristics, *Agric. For. Meteorol.*, 151, 9, 1277–1286,  
776 <https://doi.org/10.1016/j.agrformet.2011.05.008>, 2011.

777 van Stan, J.T., Gay, T.E. and Lewis, E.S.: Use of multiple correspondence analysis (MCA)  
778 to identify interactive meteorological conditions affecting relative throughfall, *J.*  
779 *Hydrol.*, 533, 452–460, <https://doi.org/10.1016/j.jhydrol.2015.12.039>, 2016.

780 Wang, X.P., Wang, Z.N., Berndtsson, R., Zhang, Y.F. and Pan, Y.X.: Desert shrub stemflow  
781 and its significance in soil moisture replenishment, *Hydrol. Earth Syst. Sci.*, 15, 561–  
782 567, <https://doi.org/10.5194/hess-15-561-2011>, 2011.

783 Yang, Z.P.: Rainfall partitioning process and its effects on soil hydrological processes for  
784 sand-fixed shrubs in Mu us sandland, Northwest China. PhD Thesis. Beijing Normal  
785 University, Beijing, 123 pp (in Chinese with English abstract), 2010.

786 Yang, X.L., Shao, M.A. and Wei, X.H.: Stemflow production differ significantly among  
787 tree and shrub species on the Chinese Loess Plateau, *J. Hydrol.*, 568, 427–436,  
788 <https://doi.org/10.1016/j.jhydrol.2018.11.008>, 2019.

789 Yuan, C., Gao, G.Y. and Fu, B.J.: Stemflow of a xerophytic shrub (*Salix psammophila*) in  
790 northern China: Implication for beneficial branch architecture to produce stemflow, *J.*  
791 *Hydrol.*, 539, 577–588, <https://doi.org/10.1016/j.jhydrol.2016.05.055>, 2016.



792 Yuan, C., Gao, G.Y. and Fu, B.J.: Comparisons of stemflow and its bio-/abiotic influential  
793 factors between two xerophytic shrub species, *Hydrol. Earth Syst. Sci.*, 21, 1421–1438,  
794 <https://doi.org/10.5194/hess-21-1421-2017>, 2017.

795 Zabret, K., Rakovec, J. and Šraj, M.: Influence of meteorological variables on rainfall  
796 partitioning for deciduous and coniferous tree species in urban area, *J. Hydrol.*, 558,  
797 29–41, <https://doi.org/10.1016/j.jhydrol.2018.01.025>, 2018.

798 Zhang, Y., Li, X.Y., Li, W., Wu, X.C., Shi, F.Z., Fang, W.W. and Pei, T.T.: Modeling rainfall  
799 interception loss by two xerophytic shrubs in the Loess Plateau, *Hydrol. Process.*, 31,  
800 1926–1937, <https://doi.org/10.1002/hyp.11157>, 2017.

801 Zhang, Y.F., Wang X.P., Hu, R., Pan Y.X. and Paradeloc, M.: Rainfall partitioning into  
802 throughfall, stemflow and interception loss by two xerophytic shrubs within a rain-fed  
803 re-vegetated desert ecosystem, northwestern China, *J. Hydrol.*, 527, 1084–1095,  
804 <https://doi.org/10.1016/j.jhydrol.2015.05.060>, 2015.

805 **Table 1.** Branch morphologies of *C. korshinskii* and *S. psammophila* for stemflow recording.

| Shrub species         | BD categories (mm) | Amount | BD (mm) | BL (cm) | BA (°) | LA (cm <sup>2</sup> ) |
|-----------------------|--------------------|--------|---------|---------|--------|-----------------------|
| <i>C. korshinskii</i> | 5–10               | 2      | 6.6     | 131     | 61     | 837.1                 |
|                       | 10–15              | 2      | 13.1    | 168     | 43     | 2577.3                |
|                       | 15–18              | 2      | 17.8    | 206     | 72     | 4243.1                |
|                       | 18–25              | 1      | 22.1    | 242     | 50     | 6394.7                |
|                       | >25                | NA     | NA      | NA      | NA     | NA                    |
| <i>S. psammophila</i> | 5–10               | 2      | 7.5     | 248     | 69     | 626.3                 |
|                       | 10–15              | 2      | 13.2    | 343     | 80     | 1683.5                |
|                       | 15–18              | NA     | NA      | NA      | NA     | NA                    |
|                       | 18–25              | 2      | 21.8    | 286     | 76     | 3468.3                |
|                       | >25                | 1      | 31.3    | 356     | 60     | 7513.7                |

806 Notes: BD, BL and BA are branch basal diameter, length and inclination angle, respectively; LA is leaf

807 area of individual branches; NA means not applicable.

808 **Table 2.** Rainfall characteristics during events with different intensity peak amounts.

| Indicators                               | Event A | Event B | Event C | Others | Average    |
|------------------------------------------|---------|---------|---------|--------|------------|
| Event amount                             | 17      | 11      | 15      | 11     | 13.5±1.5   |
| RA (mm)                                  | 4.1 ab  | 5.2 b   | 11.7 c  | 0.6 a  | 5.4 ± 0.9  |
| RD (h)                                   | 2.5 a   | 3.6 a   | 10.3 b  | 2.2 a  | 4.7 ± 0.8  |
| RI (h)                                   | 48.5 ab | 70.5 b  | 57.3 ab | 26.1 a | 50.6 ± 6.1 |
| I (mm·h <sup>-1</sup> )                  | 5.6 a   | 5.5 a   | 4.6 a   | 2.2 b  | 4.5 ± 1.0  |
| I <sub>10</sub> (mm·h <sup>-1</sup> )    | 15.5 a  | 12.7 ab | 9.5 b   | 6.0 c  | 10.9 ± 2.1 |
| I <sub>b10</sub> (mm·h <sup>-1</sup> )   | 7.7 a   | 9.9 a   | 2.8 b   | 1.6 b  | 5.5 ± 1.4  |
| I <sub>e10</sub> (mm·h <sup>-1</sup> )   | 4.3 a   | 3.6 a   | 2.1 ab  | 1.2 b  | 2.8 ± 0.7  |
| F (mg·m·s <sup>-1</sup> )                | 17.1 a  | 17.6 a  | 17.2 a  | 12.5 b | 16.1 ± 1.2 |
| F <sub>10</sub> (mg·m·s <sup>-1</sup> )  | 27.8 a  | 26.6 a  | 24.2 ab | 21.0 b | 24.9 ± 1.4 |
| F <sub>b10</sub> (mg·m·s <sup>-1</sup> ) | 19.7 ab | 21.7 a  | 15.4 b  | 16.9 b | 18.4 ± 1.4 |
| F <sub>e10</sub> (mg·m·s <sup>-1</sup> ) | 17.3 a  | 16.6 a  | 13.4 b  | 16.8 a | 16.0 ± 1.0 |
| E (unitless)                             | 0.9 ab  | 1.0 ab  | 0.4 a   | 1.7 b  | 0.9 ± 0.2  |

809 Note: Event A, Event B and Event C are events with the single, double and multiple rainfall intensity  
810 peaks, respectively; Others are the events that excluded from the categorization; RA, RD and RI are  
811 rainfall amount, duration and interval, respectively; I and I<sub>10</sub> are the average and 10-min maximum  
812 rainfall intensities, respectively; I<sub>b10</sub> and I<sub>e10</sub> are the average rainfall intensities in 10 min after rain begins  
813 and before rain ends, respectively; F and F<sub>10</sub> are the average and 10-min maximum raindrop momentums,  
814 respectively; F<sub>b10</sub> and F<sub>e10</sub> are the average raindrop momentums in 10 min after rain begins and before  
815 rain ends, respectively; E is evaporation coefficient; Different letters indicate significant differences of  
816 rainfall characteristics between event categories ( $p < 0.05$ ) (rows at the table).

817 **Table 3.** Stemflow variables of *C. korshinskii* and *S. psammophila* during rainfall events  
 818 with different intensity peak amounts.

| Species               | Stemflow variables                      | Event A  | Event B  | Event C  | Others   | Average        |
|-----------------------|-----------------------------------------|----------|----------|----------|----------|----------------|
| <i>C. korshinskii</i> | SFV (mL)                                | 134.1 a  | 203.7 a  | 560.8 b  | 7.6 c    | 226.6 ± 46.4   |
|                       | SFI (mm·h <sup>-1</sup> )               | 672.9 a  | 552.4 b  | 527.0 b  | 317.8 c  | 517.5 ± 82.1   |
|                       | SFI <sub>10</sub> (mm·h <sup>-1</sup> ) | 2849.0 a | 2399.3 a | 1809.1 b | 1173.2 c | 2057.6 ± 399.7 |
|                       | FR (unitless)                           | 109.4 a  | 146.6 b  | 137.9 b  | 128.9 ab | 130.7 ± 8.2    |
|                       | TLG (min)                               | 67.3 ab  | 56.2 a   | 67.0 ab  | 74.2 b   | 66.2 ± 10.6    |
|                       | TLM (min)                               | 81.1 a   | 75.5 a   | 202.1 b  | 78.8 a   | 109.4 ± 20.5   |
|                       | TLE (min)                               | 22.3 a   | 18.7 b   | 18.5 b   | 20.6 a   | 20.0 ± 5.3     |
|                       | SFD (h)                                 | 1.4 a    | 3.1 a    | 9.1 b    | 1.4 a    | 3.8 ± 0.8      |
| <i>S. psammophila</i> | SFV (mL)                                | 102.6 a  | 145.7 a  | 435.2 b  | 4.7 c    | 172.1 ± 34.5   |
|                       | SFI (mm·h <sup>-1</sup> )               | 648.1 a  | 421.5 b  | 246.6 c  | 153.2 c  | 367.3 ± 91.1   |
|                       | SFI <sub>10</sub> (mm·h <sup>-1</sup> ) | 1672.7 a | 1582.8 a | 888.4 b  | 384.7 c  | 1132.2 ± 214.3 |
|                       | FR (unitless)                           | 77.1 a   | 91.4 a   | 129.1 b  | 101.6 ab | 101.6 ± 10.4   |
|                       | TLG (min)                               | 84.9 a   | 46.5 b   | 56.1 b   | 31.5 b   | 54.8 ± 11.7    |
|                       | TLM (min)                               | 64.3 a   | 93.4 a   | 235.8 b  | 88.4 a   | 120.5 ± 22.1   |
|                       | TLE (min)                               | 17.1 a   | 8.6 b    | 20.8 a   | 7.3 b    | 13.5 ± 17.2    |
|                       | SFD (h)                                 | 1.2 a    | 3.4 a    | 8.3 b    | 0.7 a    | 3.4 ± 0.9      |

819 Note: Event A, Event B and Event C are events with the single, double and multiple rainfall intensity  
 820 peaks, respectively; Others are the events that excluded from the categorization; TLG and TLM are time  
 821 lags of stemflow generating and maximizing after rains begin, respectively; TLE is time lag of stemflow  
 822 ending after rain ceases; SFD is stemflow duration; SFV is stemflow volume; SFI are the average  
 823 stemflow intensities at incident rains, respectively; Different letters indicate significant differences of  
 824 stemflow variables between event categories ( $p < 0.05$ ) (rows at the table).

825 **Table 4.** Comparisons of stemflow intensity and funnelling ratio at different basal diameter  
 826 categories.

| Species and stemflow variables |     | BD categories (mm) |             |             |             |             |            |
|--------------------------------|-----|--------------------|-------------|-------------|-------------|-------------|------------|
|                                |     | 5–10               | 10–15       | 15–18       | 18–25       | >25         | AVG        |
| <i>C. korshinskii</i>          | FR  | 163.7±12.2a        | 136±10.9b   | 119.5±13.0b | 97.7±9.2b   | NA          | 131±8.2    |
|                                | SFI | 716.2±118.7a       | 552.5±90.3b | 619±103.3b  | 333.8±45.8b | NA          | 553.9±82.1 |
| <i>S. psammophila</i>          | FR  | 212±17.4a          | 84±6.4b     | NA          | 44.2±3.0b   | 54.9±4.2b   | 100.6±7.9  |
|                                | SFI | 738.7±160.9a       | 360.7±82.7a | NA          | 197.2±44.9b | 209.9±44.5b | 372.2±79.4 |

827 Note: SFI and FR are the average stemflow intensity and funnelling ratio at incident rains, respectively; BD is  
 828 branch basal diameter (mm); NA means not applicable; Different letters indicate significant differences of  
 829 stemflow variables between event categories ( $p < 0.05$ ) (rows at the table).

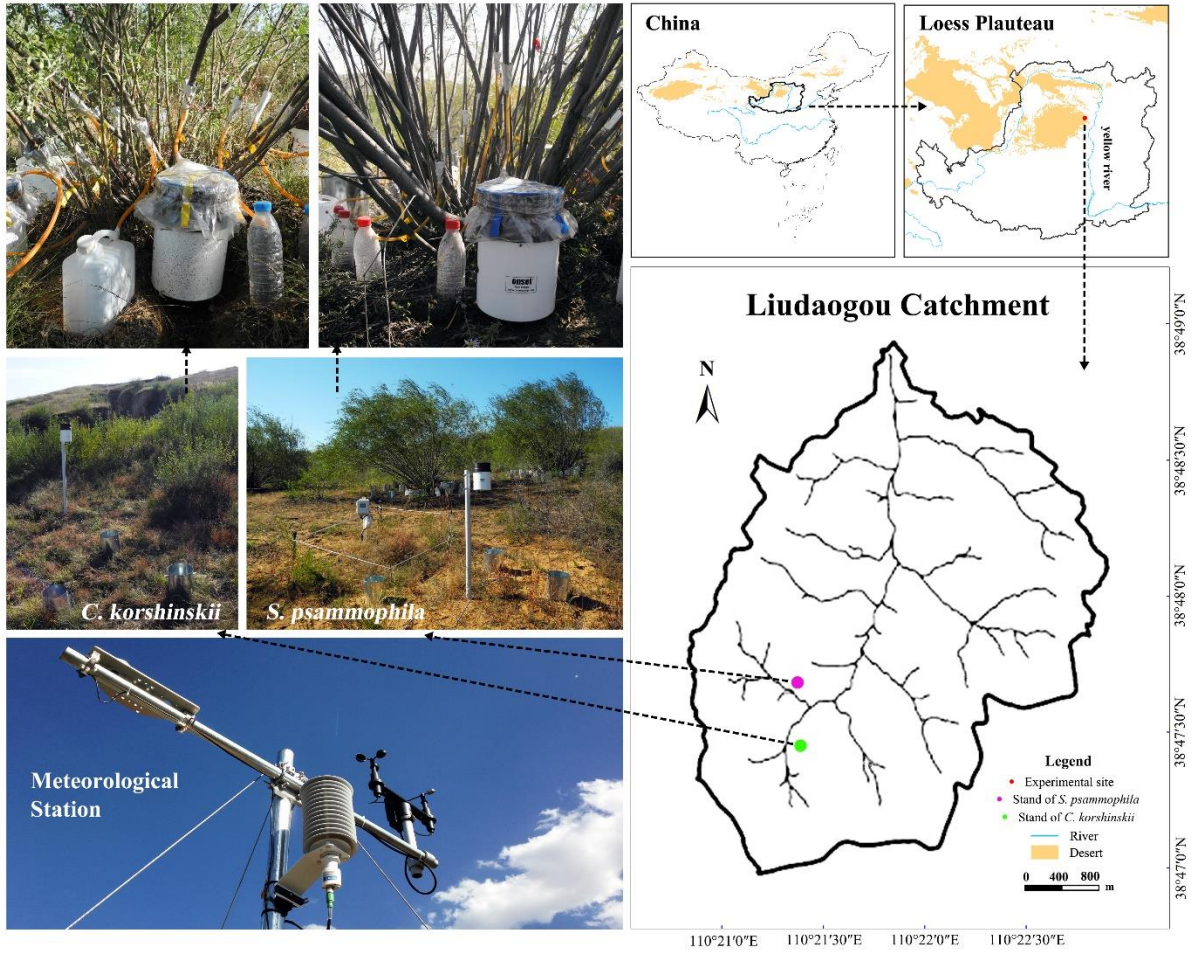

830

831 **Figure 1.** Locations and experimental settings in the plots of *C. korshinskii* and *S.*

832 *psammophila*.

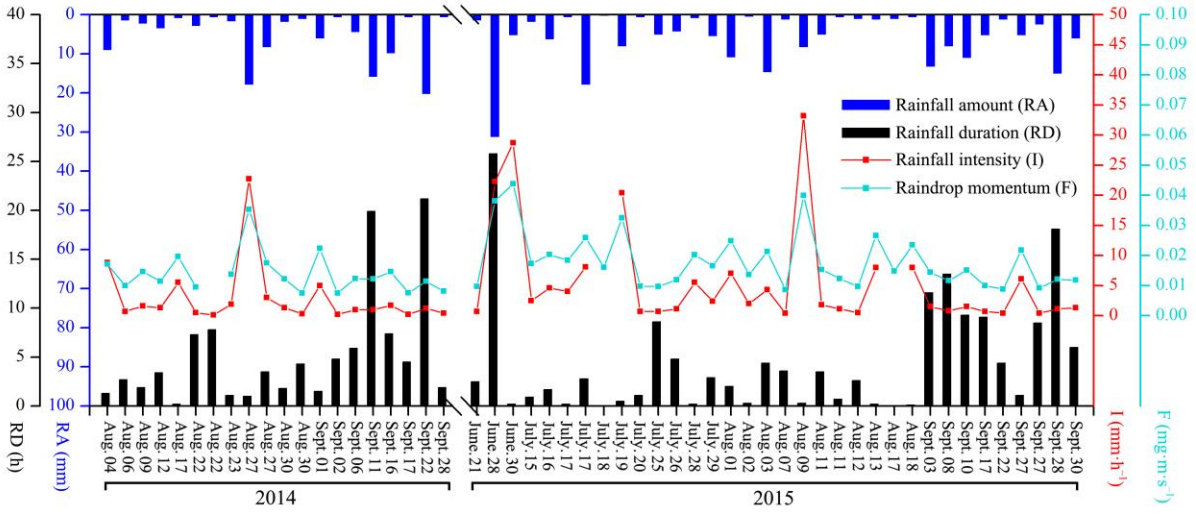

833

834 **Figure 2.** Inter-event variations in rainfall characteristics during the experimental period.

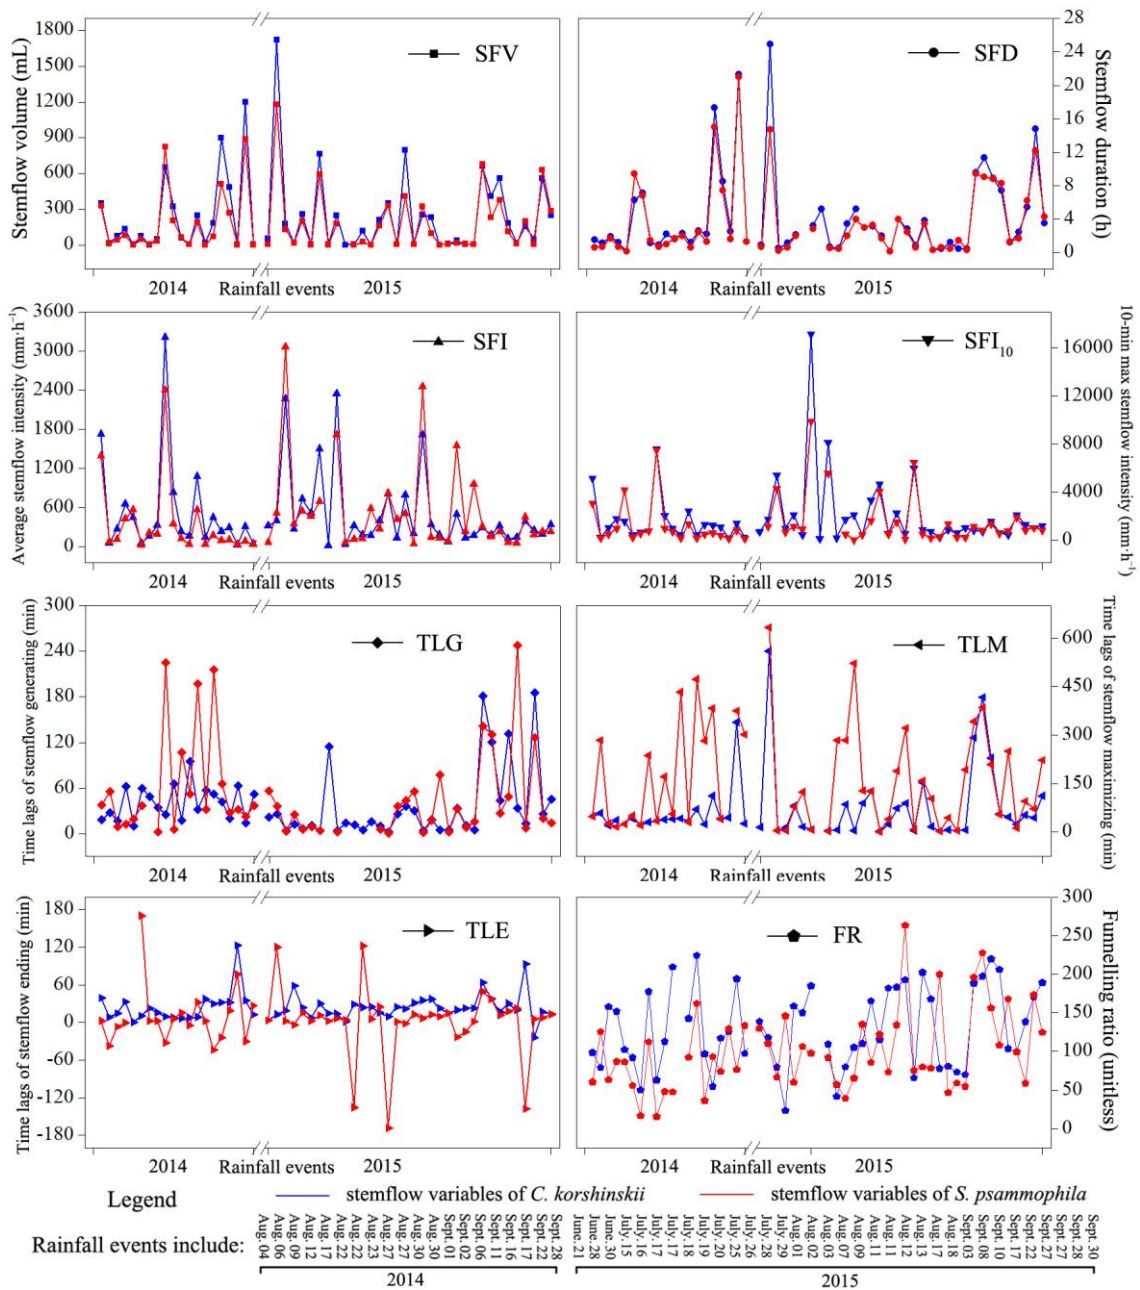

835

836 **Figure 3.** Inter-event variations in stemflow variables of *C. korshinskii* and *S. psammophila*

837 during the experimental period.



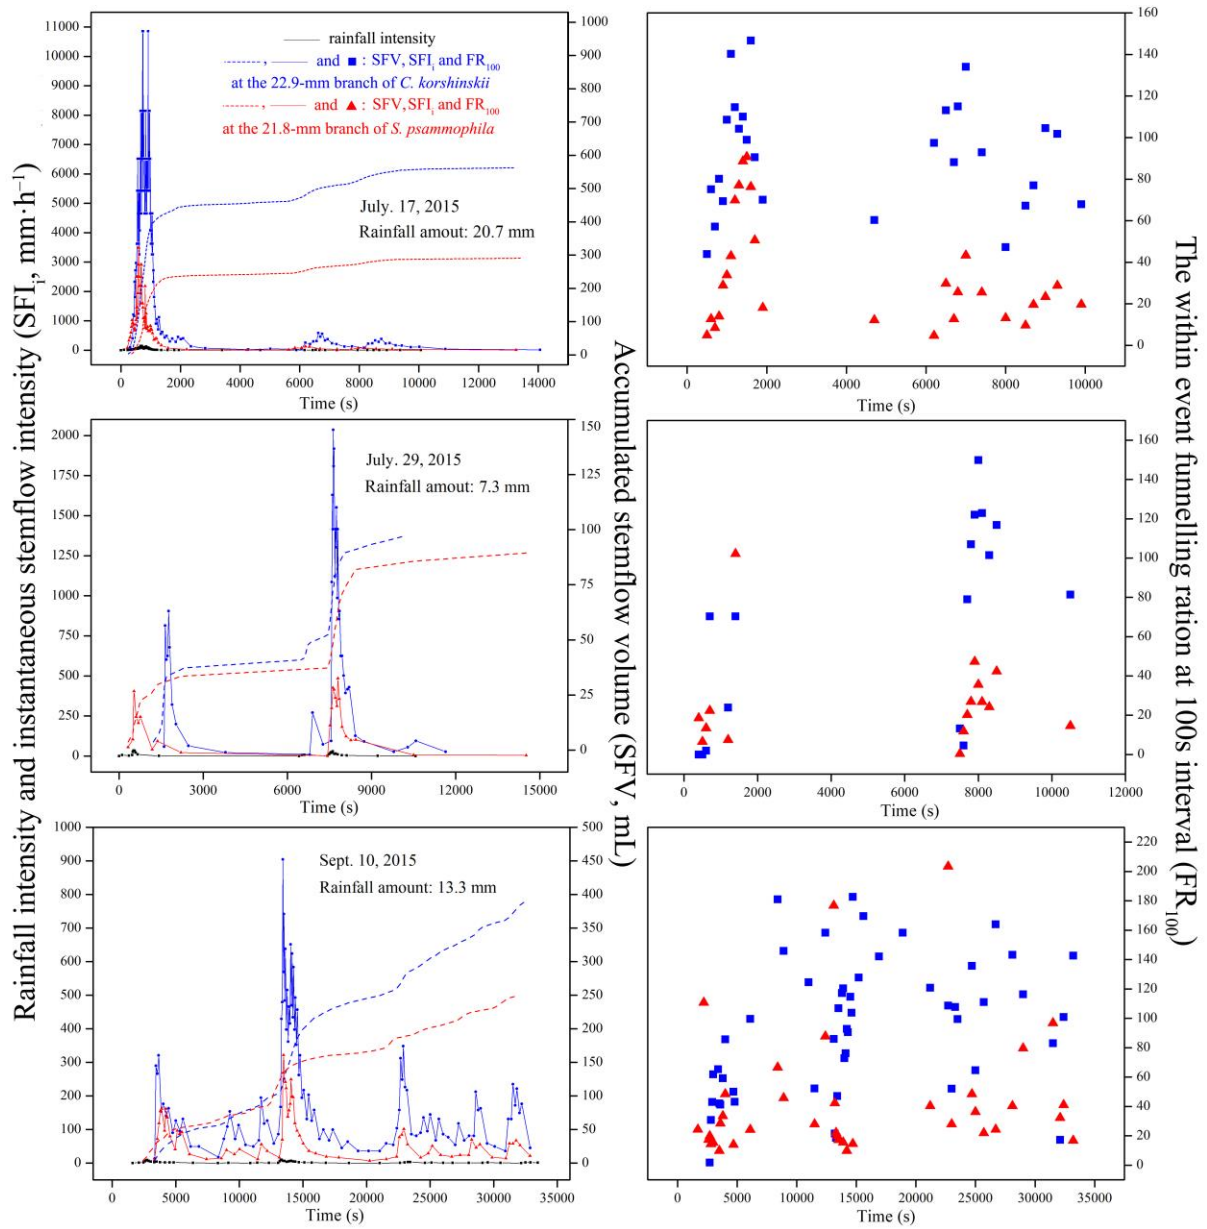

838

839 **Figure 4.** Stemflow synchronicity of *C. korshinskii* and *S. psammophila* to rains during

840 representative events with different rainfall-intensity peak amounts.

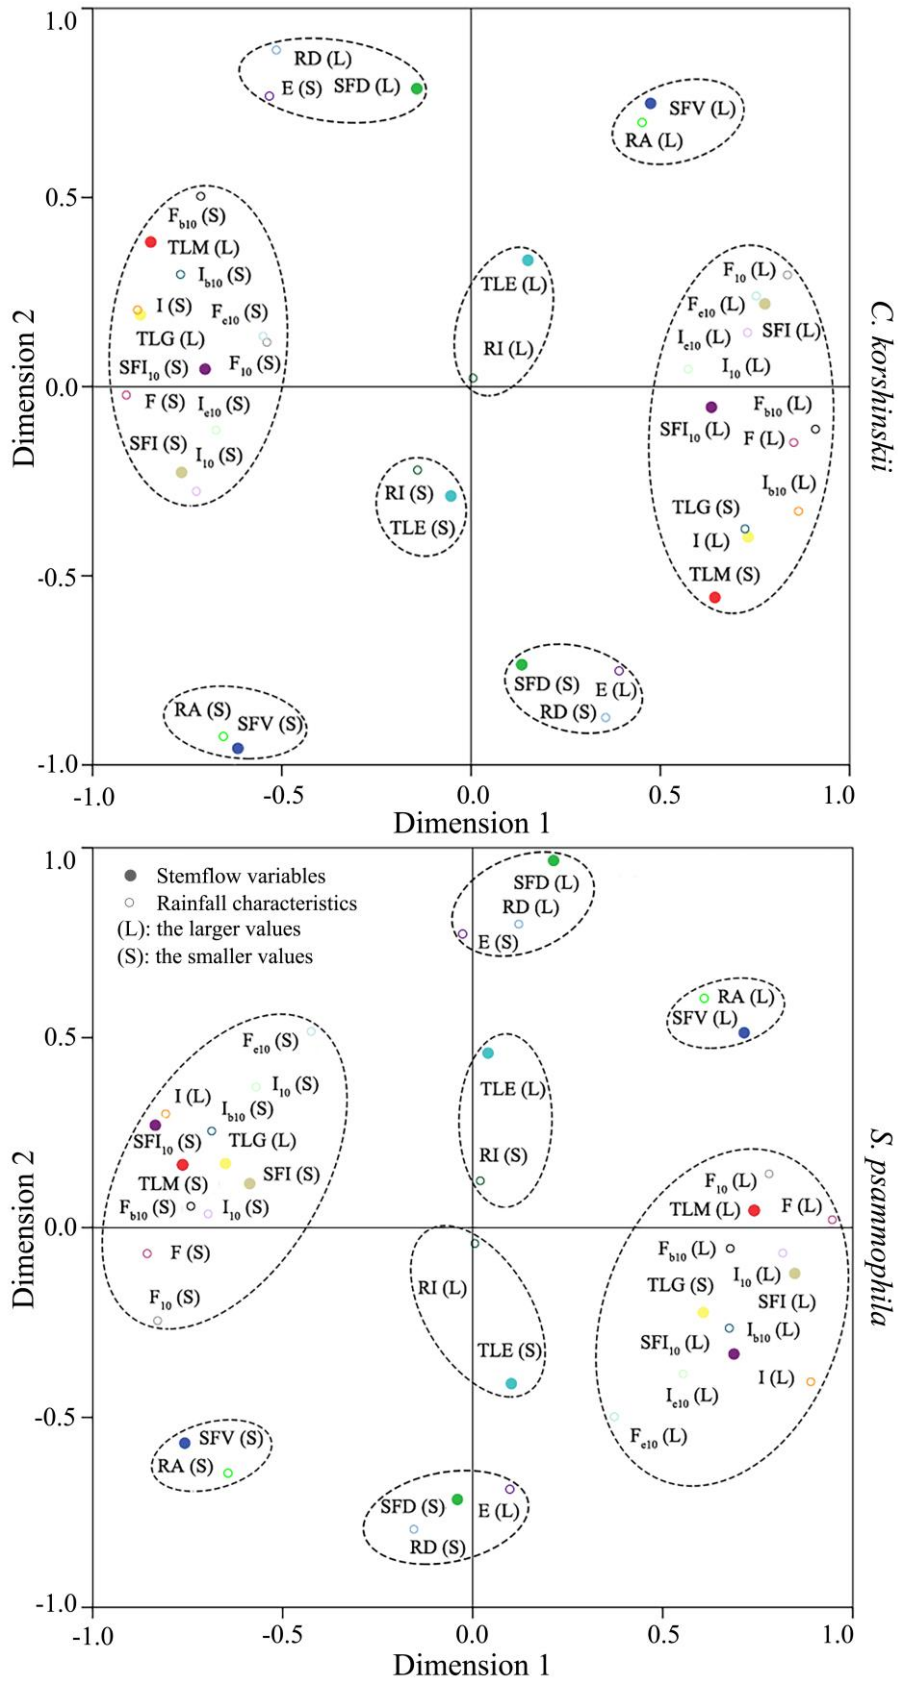

841

842 **Figure 5.** Correspondence maps of stemflow variables with rainfall characteristics for *C.*

843 *korshinskii* and *S. psammophila*.

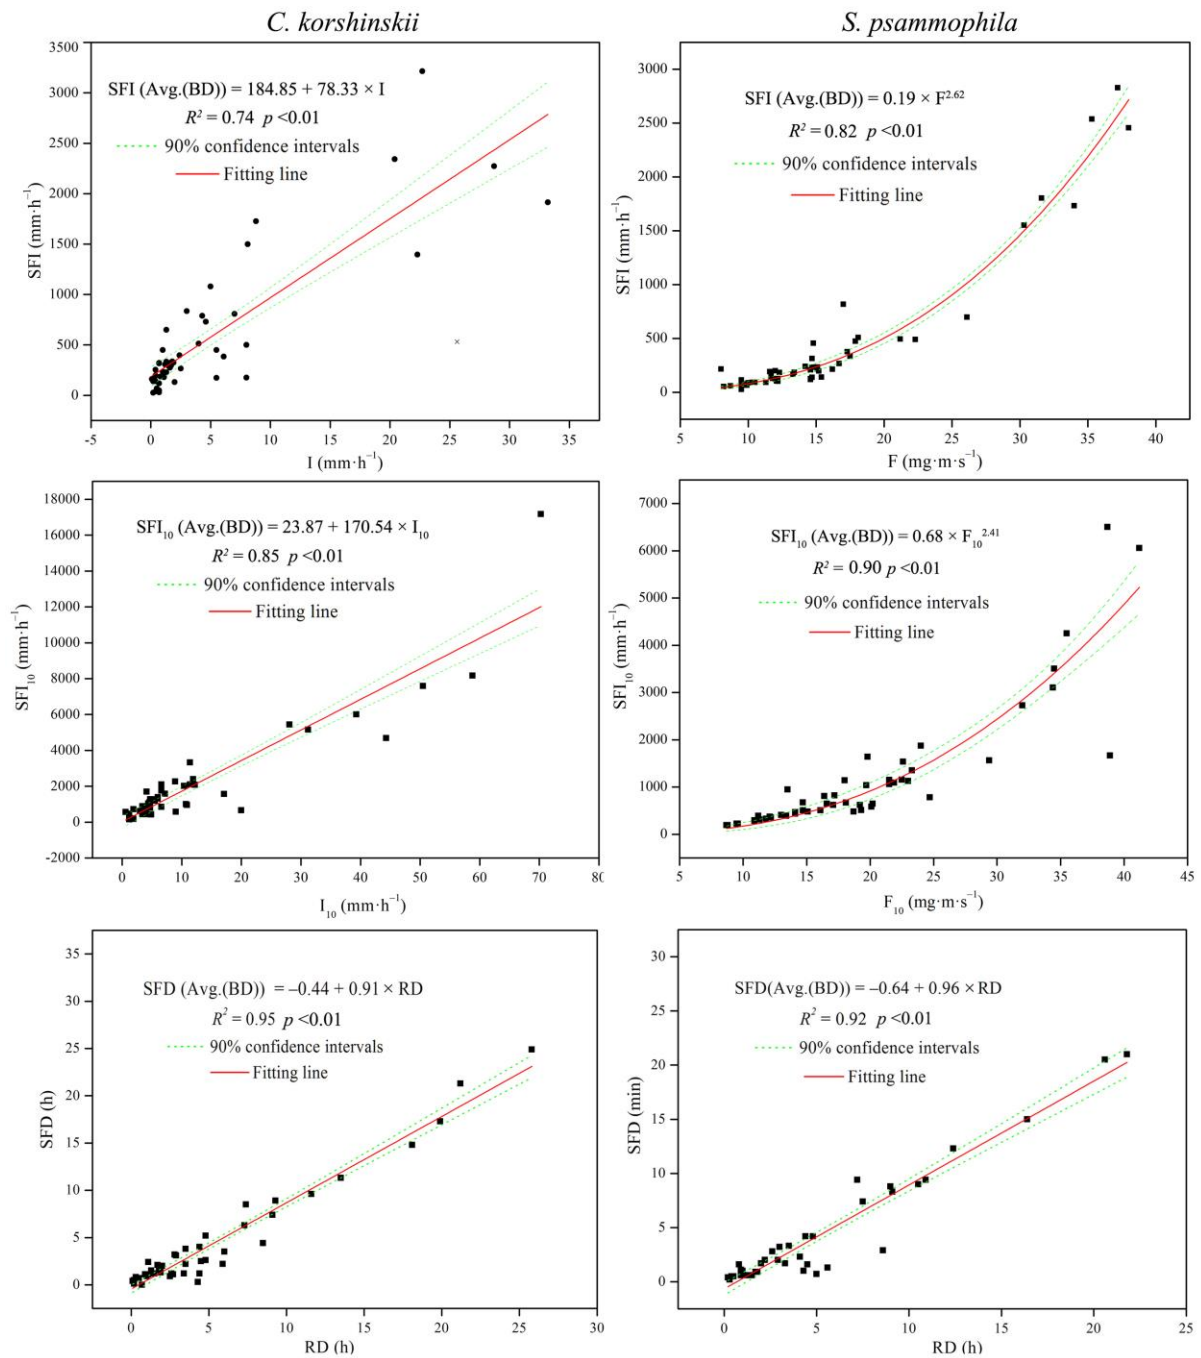

844

845 **Figure 6.** Relationships of stemflow intensity and duration with rainfall characteristics.

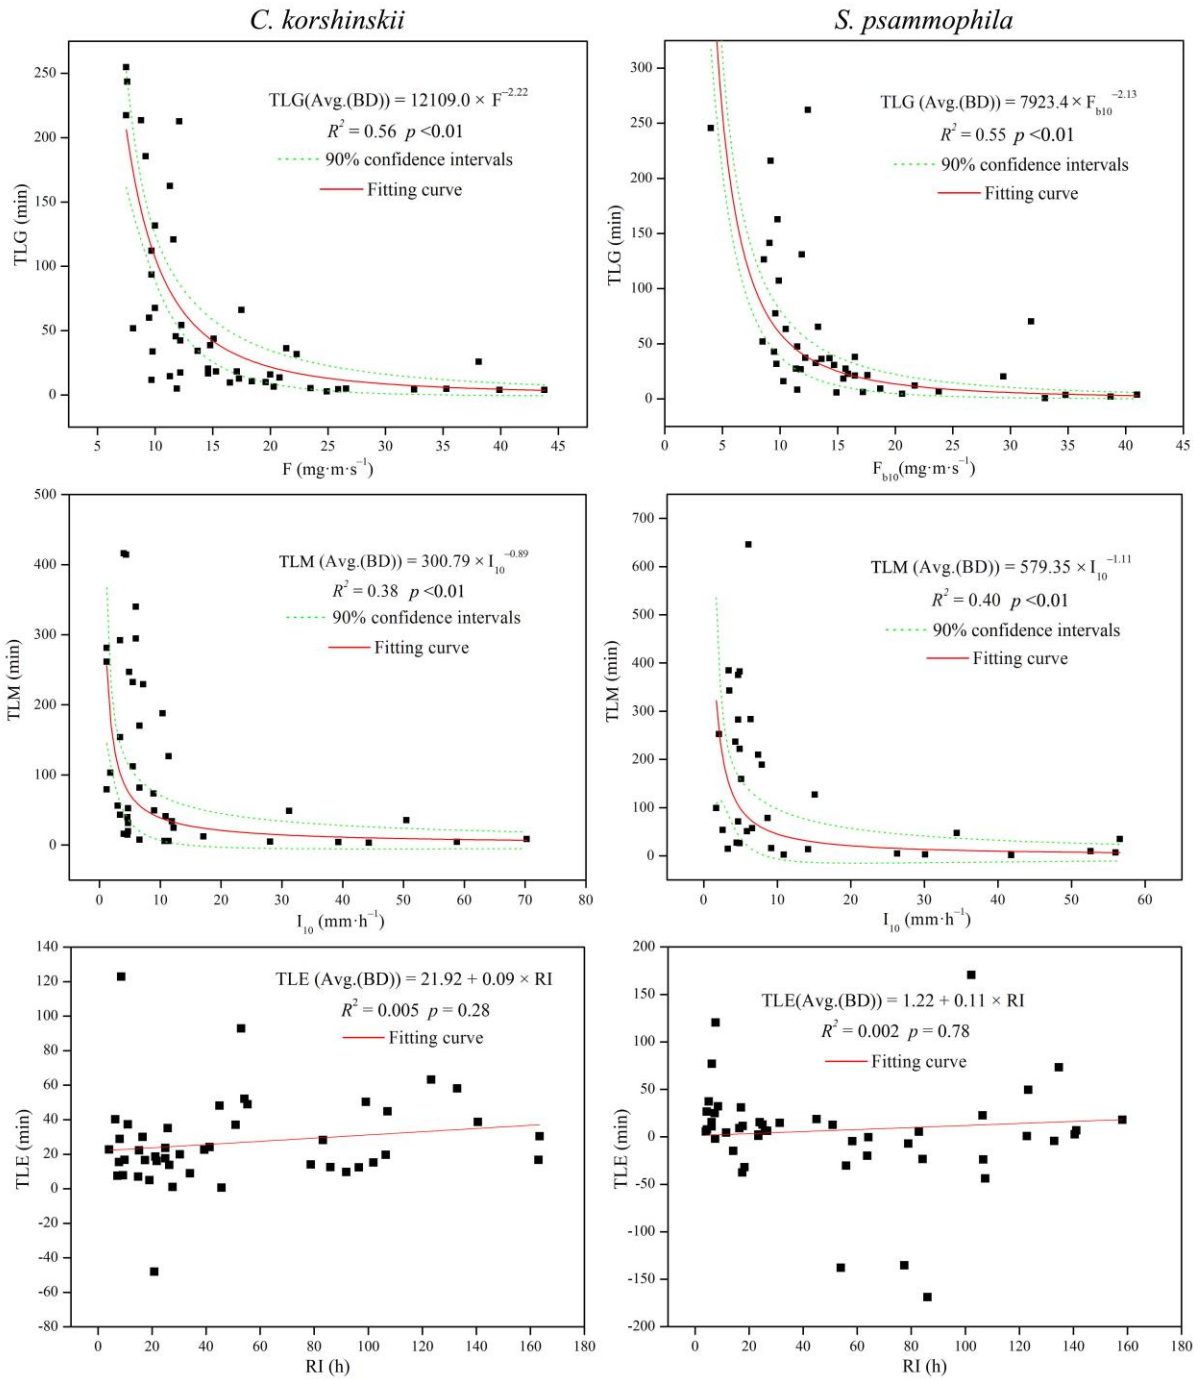

846

847 **Figure 7.** Relationships of stemflow time lags with rainfall characteristics.

---

1 **Temporal-dependent effects of rainfall characteristics on**  
2 **inter-/intra-event branch-scaled stemflow variability in two**  
3 **xerophytic shrubs**

4  
5 **Chuan Yuan<sup>1,2,3</sup>, Guangyao Gao<sup>2</sup>, Bojie Fu<sup>2</sup>, Daming He<sup>1,3</sup>, Xingwu Duan<sup>1,3</sup>, and**  
6 **Xiaohua Wei<sup>4</sup>**

7  
8 <sup>1</sup>Institute of International Rivers and Eco–security, Yunnan University, Kunming 650091,  
9 China

10 <sup>2</sup>State Key Laboratory of Urban and Regional Ecology, Research Center for  
11 Eco-Environmental Sciences, Chinese Academy of Sciences, Beijing 100085, China

12 <sup>3</sup>Yunnan Key Laboratory of International Rivers and Trans-boundary Eco–security, Kunming  
13 650091, China

14 <sup>4</sup>Department of Earth, Environmental and Geographic Sciences, University of British  
15 Columbia (Okanagan campus), Kelowna, British Columbia, V1V 1V7, Canada

16  
17 **Correspondence:** Guangyao Gao (gygao@rcees.ac.cn)

18  
19 **Abstract**

20 Stemflow is important for recharging root-zone soil moisture in arid regions. Previous  
21 studies have generally focused on stemflow volume, efficiency and influential factors but  
22 have failed to depict ~~temporal~~ stemflow processes and quantify their ~~relationships~~relations  
23 with rainfall characteristics within events, particularly for xerophytic shrubs. Here, we  
24 measured the stemflow volume, intensity, funnelling ratio, duration, and time lags to rain

25 ~~events of~~ two ~~xerophytic~~dominant shrub species (*Caragana korshinskii* and *Salix*  
26 *psammophila*) and rainfall characteristics ~~for~~during 54 events ~~in~~at the semi-arid Liudaogou  
27 catchment of the Loess Plateau, China, during the 2014–2015 rainy seasons.  
28 ~~The~~Funnelling ratio was calculated as the ratio between stemflow and rainfall intensities at  
29 the inter-/intra-event bases for the first time. Our results indicated that the stemflow  
30 ~~dynamics were well synchronized to rainfall processes. The stemflows of~~ *C. korshinskii*  
31 and *S. psammophila* were averagedly started 66.2 and 54.8 min, maximized 109.4 and 120.5  
32 min after rains began, and ended 20.0 and 13.5 min after rains ceased. They had shorter  
33 stemflow duration (3.8 and 3.4 h) and significantly larger average stemflow intensities  
34 (517.5 and 367.3 mm·h<sup>-1</sup>) than those of rains (4.7±1.5 and 4.8±1.6 mm·h<sup>-1</sup>, respectively)  
35 than that of rain at the event scale (4.5±1.0 mm·h<sup>-1</sup>), and the stemflows were even more  
36 intense (20.3±10.4 and 16.9±8.8 mm·h<sup>-1</sup>, respectively) than that of rain at 10-min intervals  
37 (10.9±2.1 and 4.5 mm·h<sup>-1</sup>). The average stemflow durations of *C. korshinskii* and *S.*  
38 *psammophila* (3.8±0.8 and 3.4±0.9 h, respectively) were shorter than the rainfall duration  
39 (4.7±0.8 h). As branch size increased, both species shared the decreasing funnelling ratios  
40 (97.7–163.7 and 44.2–212.0) and stemflow intensities (333.8–716.2 mm·h<sup>-1</sup> and 197.2–  
41 738.7 mm·h<sup>-1</sup>). Tested by ~~the~~ multiple correspondence analysis and stepwise regression,  
42 rainfall amount and duration controlled stemflow volume and duration, respectively, at ~~the~~  
43 event scale by linear ~~relationships~~relations ( $p < 0.01$ ). Rainfall intensity and raindrop  
44 momentum controlled stemflow intensity and time lags to rains for both species ~~at the~~  
45 intra-within event ~~scale~~ by linear or power relationships ( $p < 0.01$ ). Rainfall intensity was  
46 the key factor ~~for the~~affecting stemflow process of *C. korshinskii*, whereas raindrop

---

47 momentum had the greatest influence on ~~the~~ stemflow process of *S. psammophila*.  
48 ~~Rainfall~~ Therefore, rainfall characteristics had temporal-dependent influences on  
49 corresponding stemflow variables, and the influence also depended on specific species.–  
50

## 51 **1 Introduction**

52 Stemflow directs the intercepted rains from ~~the~~ canopy to the trunk base. The  
53 funnel-shaped canopy and underground preferential paths, i.e., roots, worm paths and soil  
54 macropores, converge rains to recharge the root-zone moisture (Johnson and Lehmann,  
55 2006; Li et al., 2008). Stemflow is important to concentrate water (Levia and Germer,  
56 2015), nutrients (Dawoe et al., 2018), pathogens (Garbelotto et al., 2003) and bacteria  
57 (Bittar et al., 2018) from the phyllosphere into the pedosphere (Teachey et al., 2018), even  
58 though stemflow accounts for only a ~~minimal~~ minor part of rainfall amount (RA) (6.2%) in  
59 contrast to throughfall (69.8%) and interception loss (24.0%) in ~~water-stressed~~  
60 regions dryland ecosystems with annual mean rainfall ranging in 154–900 mm (Magliano et  
61 al., 2019). Stemflow greatly contributes to the survival of xerophytic plant species (Návar,  
62 2011), the maintenance of patch structures in arid areas (Kéfi et al., 2007), and the normal  
63 functioning of rainfed dryland ecosystems (Wang et al., 2011).

64 To quantify the ecohydrological importance of stemflow, numerous studies have been  
65 conducted on stemflow production and efficiency from various aspects, including stemflow  
66 volume (mL), depth (mm), percentage (%), funnelling ratio (unitless), and productivity  
67 ( $\text{mL} \cdot \text{g}^{-1}$ , the branch stemflow volume of unit biomass) (Herwitz, 1986; Yuan et al., 2016;  
68 Zabret et al., 2018; Yang et al., 2019). By ~~applying~~ installing automatic recording devices,

---

69 the stemflow process has been gradually determined at 1-h intervals (Spencer and van  
70 Meerveld, 2016), 5-min intervals (André et al., 2008; Levia et al., 2010) and 2-min  
71 intervals (Dunkerley, ~~2014~~2014b). This determination allowed ~~the calculation of to compute~~  
72 stemflow intensity ( $\text{mm}\cdot\text{h}^{-1}$ ) (Germer et al., 2010), ~~speedflux~~ ( $\text{mL}\cdot\text{min}^{-1}$ ) (Yang, 2010) and  
73 time lag after rain (Cayuela et al., 2018). Differing from an event-based calculation, the  
74 stemflow process provided insights into the fluctuation of stemflow production at a high  
75 temporal resolution. ~~This process~~It permits a better interpretation of the “hot moment” and  
76 “hot spot” effects of many ecohydrological processes (Bundt et al., 2001; McClain et al.,  
77 2003). Quantifying ~~the~~ short-intensity burst and temporal characteristics ~~of stemflow~~ shed  
78 light on the dynamic process and pulse nature of stemflow (Dunkerley, 2019).

79 Stemflow cannot be ~~initialled after~~initiated until canopies were saturated by the rains  
80 (Martinez-Meza and Whitford, 1996). The minimal RA needed to start stemflow ~~is was~~  
81 usually calculated by regressing stemflow volume with RA ~~for at~~ different plant species ~~or~~  
82 ~~canopy states~~ (Levia and Germer, 2015). ~~In the leaf period, stemflow starts when rains are~~  
83 ~~greater than~~It also varied with canopy states, i.e., 10.9 ~~mm~~ and 2.5–~~3.4 mm~~4mm for ~~the~~  
84 ~~leafed~~ oak and beech tress, ~~respectively, in Belgium,~~ and ~~in the leafless period, the minimal~~  
85 ~~RA for stemflow generation is~~ 6.0 mm and 1.5–~~1.9 mm~~ for ~~these two species~~them in the  
86 ~~leafless period~~ (André et al., 2008; Staelens et al., 2008). ~~In comparison, a lower amount of~~  
87 ~~rain, 0.4–2.2 mm, can generally initiate stemflow of xerophytic shrubs (Yuan et al., 2017).~~  
88 Stemflow also frequently ~~continues~~continued after rains ~~ceased~~ due to the rainwater  
89 retained on the canopy/~~branch~~ surface (Iida et al., 2017). *Salix psammophila* and an open  
90 tropical forest ~~start~~started stemflow 5–~~10 min~~ and 15 min later than the beginning of a rain



---

91 event in the Mu Us desert of China (Yang, 2010) and the Amazon basin of Brazil (Germer  
92 et al., 2010), respectively. However, 1 h and 1.5 h ~~are~~were needed to start stemflow after  
93 the beginning of a rain event for pine and oak trees in north-eastern Spain, respectively  
94 (Cayuela et al., 2018). For *S. psammophila*, stemflow ~~is~~flux was maximized 20–210 min  
95 after the beginning of a rain event (Yang, 2010), and stemflow ceased 11 h after ~~rain~~  
96 ~~stopped~~rains ceased in an open tropical forest (Germer et al., 2010). ~~Stemflow time~~Time  
97 lags ~~are critical indicators for depicting the~~of stemflow generation, maximization and  
98 ending to rains depicted dynamic stemflow process ~~and are important for developing~~  
99 ~~process-based~~, and were conducive to better understand the hydrological process occurred  
100 at the interface between the intercepted rains and soil moisture (Sprenger et al., 2019).  
101 ~~models~~It was important to discuss the temporal persistence in spatial patterns of soil  
102 moisture particularly at the intra-event scale (Gao et al., 2019). However, stemflow time  
103 lags have not been systematically studied for xerophytic shrubs.

104 The preferential paths at the underside of branches for delivering stemflow complicates  
105 stemflow processes within events (Dunkerley, ~~2014~~2014a). The influences of bark  
106 microrelief— on stemflow are strongly affected by dynamic rain processes, such as rainfall  
107 intensity and raindrop striking within events (~~Van~~van Stan and Levia, 2010). While  
108 exceeding the holding capacity of branches, high rainfall intensity ~~can~~could overload and  
109 interrupt this preferential path (Carlyle-Mose and Price, 2006). Raindrops hit the canopy  
110 surface and create splashes on the surface. This process is conducive to wetting branches at  
111 the lower layers and accelerating the establishment of the preferential paths of stemflow  
112 transportation (Bassette and Bussière, 2008). Nevertheless, the interaction between the

---

113 stemflow process and intra-event rainfall characteristics has not been substantially studied.

114 This study was designed at the event and process scales to investigate inter-/intra-event  
115 stemflow variability of two dominant xerophytic shrubs. Stemflow volume, intensity,  
116 funnelling ratio and temporal dynamics of *Caragana korshinskii* and *S. psammophila* were  
117 recorded during 54 rainfall events in the 2014–2015 rainy seasons on the Loess Plateau of  
118 China. Temporal dynamics were expressed as stemflow duration and time lags of stemflow  
119 generation, maximization and cessation to ~~the start of rain events~~rains. Raindrop  
120 momentum was introduced to represent the comprehensive effects of raindrop size, velocity,  
121 inclination angle and kinetic energy ~~on~~at the stemflow process. Funnelling ratio had been  
122 calculated at the event base and the 100-s intervals to assess the convergence effects of  
123 stemflow. This study specifically aimed to (1) depict the stemflow process in terms of  
124 stemflow intensity and temporal dynamics, (2) identify the dominant rainfall characteristics  
125 influencing inter-/intra-event stemflow variables, and (3) quantify the relationships  
126 between stemflow process variables and rainfall characteristics. Achieving these objectives  
127 would advance our knowledge of the process-based stemflow production to better  
128 understand the pulse nature of stemflow and its interactions with dynamic rain processes.

## 129 **2 Materials and Methods**

### 130 **2.1 Site description**

131 This study was conducted in the Liudaogou catchment (110°21'–110°23'E, 38°46'–  
132 38°51'N) in Shenmu city, Shaanxi Province, China, during the 2014–2015 rainy seasons.  
133 This catchment is 6.9 km<sup>2</sup> and 1094–1273 m above sea level (m.a.s.l.). A semiarid  
134 continental climate prevails in this area. The mean annual precipitation (MAP) is 414 mm

---

135 (1971–2013). Most MAP (77%) occurs from July to September (Jia et al., 2013). The mean  
136 annual potential evaporation is 1337 mm (Yang et al., 2019). The mean annual temperature  
137 is 9.0 °C. The dominant shrubs include *C. korshinskii*, *S. psammophila*, and *Amorpha*  
138 *fruticosa*. The dominant grasses are *Artemisia capillaris*, *Artemisia sacrorum*, *Medicago*  
139 *sativa*, *Stipa bungeana*, etc.

140 ~~*C. korshinskii* and *S. psammophila* are two representative xerophytic shrub species.~~  
141 ~~They *psammophila* are dominant shrub species at the arid and semi-arid regions of~~  
142 ~~northwestern China (Hu et al., 2016; Liu et al., 2016). They were commonly planted for~~  
143 ~~soil and water conservation, sand fixation and wind barrier, and had extensive distributions~~  
144 ~~at this region (Li et al., 2016). The both species~~ have inverted-cone crowns and no trunks,  
145 with multiple branches running obliquely from the base. As modular organisms and  
146 multi-stemmed shrub species, their branches live as independent individuals and compete  
147 with each other for water and light (Firn, 2004). Two plots were established in the  
148 southwestern catchment for these two xerophytic shrubs planted in the 1990s (Fig. 1). *C.*  
149 *korshinskii* and *S. psammophila* plots share similar stand conditions with elevations of 1179  
150 and 1207 m.a.s.l., slopes of 13° and 18°, and sizes of 3294 and 4056 m<sup>2</sup>, respectively. The  
151 *C. korshinskii* plot has a ground surface of loess and aspect of 224°, while the *S.*  
152 *psammophila* plot has a ground surface of sand and an aspect of 113°.

## 153 2.2 Meteorological measurements and calculations

154 A meteorological station was installed at the experimental plot of *S. psammophila* to  
155 record rainfall characteristics and wind speed (WS, m·s<sup>-1</sup>). ~~The Onset® (Onset Computer~~  
156 ~~Corp., USA) RG3-M tipping bucket rain gauges (with a diameter of 15.24 cm and a~~

157 resolution of 0.2 mm) recorded the rain amount and timing of incident rains. Discrete  
158 rainfall events were defined by a measurable RA of 0.2 mm (the resolution limit of the  
159 RG3-M rain gauge) and the smallest 4 h gap without rains (the analogue period of time to  
160 dry canopies from antecedent rains) (Giacomin and Trucchi, 1992; Zhang et al., 2015; Yang  
161 et al.) (Model 03002, R. M. Young Company, USA), air temperature (T, °C) and relative  
162 humidity (H, %) (Model HMP 155, Vaisala, Finland). They were logged at 10-min intervals  
163 by a datalogger (Model CR1000, Campbell Scientific Inc., USA). Evaporation coefficient  
164 (E, unitless) was calculated to present the evaporation intensity (Equations 1–3) via  
165 aerodynamic approaches (Carlyle-Mose and Schooling, 2015). Tipping-bucket rain gauges  
166 (hereinafter referred to as “TBRG”) automatically recorded the volume and timing of  
167 rainfall and stemflow (Herwitz, 1986; Germer et al., 2010; Spencer and Meerveld, 2016;  
168 Cayuela et al., 2018). To mitigate the systematic errors for missing the records of inflow  
169 during tipping intervals (Groisman and Legates, 1994), we chose the Onset® (Onset  
170 Computer Corp., USA) RG3-M TBRG with the relatively smaller underestimation for its  
171 smaller bucket volume ( $3.73 \pm 0.01$  mL) (Iida et al., 2012). Besides, three 20-cm-diameter  
172 standard rain gauges were placed around TBRG with a 0.5-m distance at the 120°  
173 separation (Fig. 1). The regression ( $R^2=0.98$ ,  $p<0.01$ ) between manual measurements and  
174 automatic recording further mitigated the understanding of inflow water by applying TBRG  
175 (Equation 4). ~~WS was recorded by wind sensors (Model 03002, R. M. Young~~  
176 ~~Company, USA) and logged at 10-min intervals by a datalogger (Model CR1000, Campbell~~  
177 ~~Scientific Inc., USA). For the 0.8 km distance between the two plots, the meteorological~~  
178 ~~data were also applied to the *C. korshinskii* plot.~~

$$e_s = 0.611 \times \exp\left(\frac{17.27 \times T}{237.7 + T}\right) \quad (1)$$

$$VPD = e_s \times (1 - H) \quad (2)$$

$$E = WS \times VPD \quad (3)$$

where  $e_s$  is the saturation vapor pressure (kPa);  $T$  is air temperature ( $^{\circ}\text{C}$ );  $H$  is air relative humidity (%);  $VPD$  is the vapor pressure deficit (kPa); and  $E$  is the evaporation coefficient (unitless).

$$IW_A = IW_R \times 1.32 + 0.16 \quad (4)$$

where  $IW_R$  is the recording of Inflow water (including rainfall and stemflow) via TBRG (mm), and  $IW_A$  is the adjusted inflow water (mm).

Discrete rainfall events were defined by a measurable RA of 0.2 mm (the resolution limit of the TBRG) and the smallest 4-h gap without rains. That was the same period of time to dry canopies from antecedent rains as reported by Giacomini and Trucchi (1992), Zhang et al. (2015), Zhang et al., (2017) and Yang et al. (2019). Rainfall interval (RI, h) was calculated to indirectly represent the bark wetness. Other rainfall characteristics were calculated also computed, including the RA (mm), rainfall duration (RD, h), rainfall interval (RI, h), the average and 10-min maximum rainfall intensity of incident rains ( $I$  and  $I_{10\text{min}}$ , respectively,  $\text{mm}\cdot\text{h}^{-1}$ ), and the 10-min average rainfall intensity after rain begins ( $I_{b10}$ ,  $\text{mm}\cdot\text{h}^{-1}$ ) and before rain ends ( $I_{e10}$ ,  $\text{mm}\cdot\text{h}^{-1}$ ). Raindrop traits include diameter ( $D$ , mm) (Herwitz and Slye, 1995), terminal velocity ( $V$ ,  $\text{m}\cdot\text{s}^{-1}$ ) (Carlyle Moses and Schooling, 2015), and average inclination angle ( $\theta$ ,  $^{\circ}$ ) (Herwitz and Slye, 1995; Van Stan et al., 2011).

By assuming a perfect sphere of a raindrop (Uijlenhoet and Torres, 2006), the average raindrop momentum in the vertical direction ( $F$ ,  $\text{mg}\cdot\text{m}\cdot\text{s}^{-1}$ ) (Equation 8–9) was computed to

201 comprehensively represent the effects of raindrop morphology and energysize (D, mm)  
 202 (Equation 5), terminal velocity (v, m·s<sup>-1</sup>) (Equation 6), average inclination angle (θ, °)  
 203 (Equation 7) affecting stemflow process (Brandt, 1990; Kimble, 1996).

$$204 \quad D = 2.23 \times (0.03937 \times I)^{0.102} \quad (1)$$

$$205 \quad V = 3.378 \times \ln(D) + 4.213 \quad (2)$$

$$206 \quad \tan \theta = WS / V \quad (3)$$

$$207 \quad F_0 = M \times V = (1/6 \times \rho \times \pi \times D^3) \times V \quad (4)$$

$$208 \quad F = F_0 \times \cos \theta \quad (5)$$

209 where ~~I is the average rainfall intensity of incident rains (mm·h<sup>-1</sup>), M is the average~~  
 210 ~~raindrop mass (g), and F<sub>0</sub> is the average raindrop momentum (mg·m·s<sup>-1</sup>). ρ is the density of~~  
 211 ~~freshwater at standard atmospheric pressure and 20°C (0.998 g·cm<sup>-3</sup>). WS is the average~~  
 212 ~~wind speed of incident rains (m·s<sup>-1</sup>; van Stan et al., 2011; Carlyle-Moses and Schooling,~~  
 213 ~~2015). The 10-min maximum raindrop momentum (F<sub>10</sub>, mg·m·s<sup>-1</sup>) and the average~~  
 214 ~~raindrop momentum at the first and last 10 min (F<sub>b10</sub> and F<sub>e10</sub>, respectively, mg·m·s<sup>-1</sup>)~~  
 215 ~~could also be calculated with I<sub>10</sub>, I<sub>b10</sub> and I<sub>e10</sub> during incident rains as indicated at Equation~~  
 216 ~~5–9, respectively. For the 0.8-km distance between the two plots, the meteorological data~~  
 217 ~~were used at the *C. korshinskii* plot.~~

$$218 \quad D = 2.23 \times (0.03937 \times I)^{0.102} \quad (5)$$

$$219 \quad v = 3.378 \times \ln(D) + 4.213 \quad (6)$$

$$220 \quad \tan \theta = \frac{WS}{v} \quad (7)$$

$$221 \quad F_0 = m \times v = \left(\frac{1}{6} \times \rho \times \pi \times D^3\right) \times v \quad (8)$$

$$222 \quad F = F_0 \times \cos \theta \quad (9)$$

223 where  $D$  is raindrop diameter (mm);  $I$  is the average rainfall intensity of incident rains  
224 ( $\text{mm}\cdot\text{h}^{-1}$ );  $v$  is raindrop velocity ( $\text{m}\cdot\text{s}^{-1}$ );  $\theta$  is average inclination angle of raindrops ( $^\circ$ );  $WS$   
225 is the average wind speed of incident rains ( $\text{m}\cdot\text{s}^{-1}$ );  $F_0$  is the average raindrop momentum  
226 ( $\text{mg}\cdot\text{m}\cdot\text{s}^{-1}$ );  $m$  is the average raindrop mass (g);  $\rho$  is the density of freshwater at standard  
227 atmospheric pressure and  $20^\circ\text{C}$  ( $0.998\text{ g}\cdot\text{cm}^{-3}$ ).

### 228 **2.3 Experimental branch selection and measurements**

229 This study focused on the branch-scaled stemflow production of the 20-year-old *C.*  
230 *korshinskii* and *S. psammophila*. ~~By selecting four 20-year-old~~ Based on plot investigation,  
231 the canopy traits of standard shrubs ~~of~~ were determined. Four shrubs were selected  
232 accordingly at each species with similar crown areas and heights ( $5.1\pm 0.3\text{ m}^2$  and  $2.1\pm 0.2$   
233  $\text{m}$  for *C. korshinskii* and  $21.4\pm 5.2\text{ m}^2$  and  $3.5\pm 0.2\text{ m}$  for *S. psammophila*, respectively), ~~the~~  
234 ~~variance in canopy traits was neglected.~~ The isolated canopies ~~approximately 10-m gap~~  
235 between them guaranteed ~~that they were exposed~~ shrubs exposing to the similar rainfall  
236 ~~characteristics.~~ meteorological conditions (Yuan et al., 2016). We measured branch  
237 morphologies of all 180 and 261 branches ~~of~~ at experimental shrubs of *C. korshinskii* and *S.*  
238 *psammophila*, respectively. ~~Branch basal, including BD (Basal diameter (BD) was~~  
239 ~~measured, mm)~~ with a Vernier calliper (Model 7D-01150, Forgestar Inc., Germany).  
240 ~~Branch), branch length (BL) and branch angle (BA) were estimated, cm)~~ with a measuring  
241 tape, and branch angle (BA,  $^\circ$ ) with pocket geologic compass (Model DQL-8, Harbin  
242 Optical Instrument Factory, China), respectively. ~~Then, the branches were grouped into~~  
243 ~~five~~ Thus, BD categories ~~of~~ were determined at 5–10 mm, 10–15 mm, 15–18 mm, 18–25  
244 mm and >25 mm. ~~Two~~ to guarantee the appropriate branch amounts within categories for

245 meeting the statistical significance. Two representative branches with median BDs were  
246 selected in each category for stemflow recording. ~~These~~The experimental branches had no  
247 intercrossing with neighbouring ~~branches~~ones and no turning point in height from branch  
248 tip to base. The ~~outlayer-of-canopy-skirt-locations~~ positions avoided over-shading by the  
249 upper layer branches and permitted convenient measurements. Since ~~there were not~~  
250 ~~sufficient~~the qualified branch with the >25-mm branch size was not enough for ~~the~~-C.  
251 ~~korshinskii shrubs~~ and the ~~tipping-bucket-rain-gauges~~TBRG malfunctioned at the ~~15-18-~~  
252 ~~25-~~mm branches of *S. psammophila*, stemflow data were not available in these BD  
253 categories. In total, ~~stemflow was automatically recorded at~~ 7 branches ~~for~~ were selected  
254 for stemflow measurements at each species (Table 1). As the important interface to  
255 intercept rains at the growing season, the well-verified allometric growth equations were  
256 performed to estimate the branch leaf area (LA, cm<sup>2</sup>) of *C. korshinskii* (LA=39.37×BD<sup>1.63</sup>  
257 R<sup>2</sup>=0.98) (Yuan et al., 2017) and *S. psammophila* (LA=18.86×BD<sup>1.74</sup> R<sup>2</sup>=0.90) (Yuan et al.,  
258 2016), respectively.

## 259 2.4 Stemflow measurements and calculations

260 ~~We~~ A total of 14 TBRGs had been applied to automatically record the branch stemflow  
261 production of *C. korshinskii* and *S. psammophila*. The data of stemflow volume and timing  
262 were automatically recorded at dynamic intervals between neighboring tips. We installed  
263 aluminium foil collars to trap stemflow, at branches nearly 40 cm off the ground, higher  
264 than TBRG orifice with height of 25.7 cm (Fig. 1). They were fitted around the entire  
265 branch circumference and sealed by neutral silicone caulking. The limited ~~external~~orifice  
266 diameter of ~~the~~ foil collars minimized the accessing of throughfall and rains ~~accessing into~~



267 them. The RG3-M tipping bucket rain gauges recorded the stemflow production and timing,  
 268 thus computing the stemflow volume, duration, intensity and time lags to rain. (Yuan et al.,  
 269 2017). The 0.5-cm-diameter polyvinyl chloride hoses hung vertically and channelled  
 270 stemflow from the collars to TBRGs with a minimum travel time. TBRGs were covered  
 271 with the polyethylene film-covered gauges preventing films to prevent the accessing of  
 272 throughfall and splash (Fig. 1). The hoses hung vertically to minimize the travel time to the  
 273 rain gauges for an accurate recording of stemflow timing and intensity. These  
 274 apparatuses were periodically checked to avoid against leakages or blockages by insects and  
 275 fallen leaves.

276 The stemflow variables at the branches of *C. korshinskii* and  
 277 *S. psammophila* were calculated as follows follow.

278 (1) Stemflow volume (SFV, mL): the average stemflow volume of individual branches  
 279 of *C.* Adjusted with Equation 4 firstly, SFV ~~of *C. korshinskii* and *S. psammophila*~~. This  
 280 variable was converted from computed with the auto-TBRG recordings of branch  
 281 stemflow via the tipping bucket rain gauges ((SF<sub>RG</sub>, mm) by multiplying the  
 282 baseits orifice area of the RG3-M rain gauges (182(186.3 cm<sup>2</sup>) (Equation 10).

$$283 \quad \text{SFV} = \text{SF}_{\text{RG}} \times 18.63 \quad (10)$$

284 (2) Stemflow intensity (mm·h<sup>-1</sup>): the branch stemflow volume in a certain time,  
 285 including SFI, SFI<sub>10</sub> per branch basal area per unit time. SFI (mm·h<sup>-1</sup>) is the  
 286 average stemflow intensity of incident rains, which is computed by the  
 287 event-based SFV (mL), branch basal area (BBA, mm<sup>2</sup>) and RD (h) (Equation 11)  
 288 (Herwitz, 1986; Spencer and Meerveld, 2016). SFI<sub>10</sub> (mm·h<sup>-1</sup>) is the 10-min

289 maximum stemflow intensity, which is calculated with the 10-min maximum  
 290 stemflow volume (SFV<sub>10</sub>, mL) and BBA (mm<sup>2</sup>) (Equation 12). SFI<sub>i</sub> in this study.  
 291 SFI and SFI<sub>10</sub> are the average and 10-min maximum stemflow intensities during  
 292 incident rains, which were computed by the branch stemflow as recorded by the  
 293 tipping bucket rain gauges (mm) and rainfall duration (h). SFI<sub>i</sub>(mm·h<sup>-1</sup>) is the  
 294 instantaneous stemflow intensity, which ~~wasis~~ calculated in terms of by the tip  
 295 volume of the RG3-M rain gauge (0.2 mm TBRG (3.73 mL), BBA (mm<sup>2</sup>) and time  
 296 intervals between neighbouring tips (t<sub>i</sub>, h) (Equation 13). The comparison between  
 297 SFI<sub>i</sub> and the corresponding rainfall intensity depicted the synchronicity of  
 298 stemflow with rains within event.

$$299 \quad \text{SFI} = 1000 \times \frac{\text{SFV}}{(\text{BBA} \times \text{RD})} \quad (11)$$

$$300 \quad \text{SFI}_{10} = 6000 \times \frac{\text{SFV}_{10}}{\text{BBA}} \quad (12)$$

$$301 \quad \text{SFI}_i = \frac{3730}{(\text{BBA} \times t_i)} \quad (13)$$

302 (3) Stemflow temporal dynamics: stemflow duration and time lags ~~in response~~ to rains.

303 SFD (h): ~~the duration from stemflow beginning to its ending~~duration. It is  
 304 computed by different timings between the first- and last-tips of stemflow via  
 305 TBRG.

306 TLG (min): time lag of stemflow generation ~~to~~after rain begins. It is computed by  
 307 different first-tip timings between rainfall beginning and stemflow via TBRG.

308 TLM (min): time lag of stemflow ~~intensity peak to~~maximization after rain begins.  
 309 It is computed by different timings between the largest-SFI<sub>i</sub> and first-rainfall  
 310 beginningtips via TBRG.

TLE (min): time lag of stemflow ending ~~to rainfall ceasing~~ after rain ceases. It is computed by different last-tip timings between rainfall and stemflow via TBRG.

(4) ~~Ratio~~ Funnelling ratio: the efficiency for capturing and delivering raindrops from the canopies to trunk/branch base (Siegert and Levia, 2014; Cayuela et al., 2018). By introducing RD at both numerator and denominator of the ~~intra-event stemflow intensity (RSFI, original equation (Herwitz, 1986), FR (unitless):)~~ was transformed as the ratio between stemflow intensity and rainfall intensity at 100-s intervals intensities at the event base (Equation 14). FR<sub>100</sub> described the within events. Similar to the ~~event~~ funnelling ratio (unitless) at the event scale (Herwitz, 1986; Siegert and Levia, 2014), the RSFI quantifies the convergence effect of stemflow by comparing stemflow intensity with rainfall intensity at a high temporal resolution (100-s) within events at the 100-s interval after rain began (Equation 15).

We calculated stemflow volume, intensity and temporal dynamics for 54 rainfall events during the experimental period. While representative rains had RAs of 5–10 mm, 10–20 mm and >20 mm, RSFI was compared during events to illustrate the fluctuating convergence effects of stemflow. The comparison between SFI<sub>i</sub> and rainfall intensity depicted the synchronicity between stemflow and rains.

$$FR = 1000 \times \frac{SFV}{BBA \times RA} = 1000 \times \frac{\frac{SFV}{BBA} / RD}{RA / RD} = \frac{SFI}{I} \quad (14)$$

$$FR_{100i} = \frac{SFI_{100i}}{I_{100i}} \quad (15)$$

where SFV is branch stemflow volume (mL); RA is rainfall amount (mm); BBA is branch basal diameter (mm<sup>2</sup>); RD is rainfall duration (h); SFI and I were stemflow and rainfall intensities (mm·h<sup>-1</sup>), respectively; FR<sub>100i</sub> is funnelling ratio at the number *i* interval of 100 s after rain begins.

## 2.5 Data analysis

The stemflow variables were averaged among different BD categories to analyse the influences of most influential rainfall characteristics on affecting them. The Pearson correlation analyses were firstly performed to test the relationships between rainfall characteristics and stemflow variables. This analysis includes the intra-event rainfall characteristics ((RA, RD, RI, I, I<sub>10</sub>, I<sub>b10</sub>, I<sub>e10</sub>, F, F<sub>10</sub>, F<sub>b10</sub> and F<sub>e10</sub>) and stemflow variables (SFI, SFI<sub>10</sub>, TLG, TLM and TLE), and the inter-event rainfall characteristics (RA, RD and RI and E) and stemflow variables (SFV, SFI, SFI<sub>10</sub>, FR, TLG, TLM, TLE and SFD). The significantly related factors were grouped according to the in terms of median value. These factors were then, and compiled into indicator matrices and. They were standardized for a cross-tabulation check as required by the multiple correspondence analysis (MCA) (Levia et al., 2010; Vanyan Stan et al., 2011, 2016). All qualified data were restructured into orthogonal dimensions (Hair et al., 1995), where distances between row and column points were maximized (Hill and Lewicki, 2007). As shown in the correspondence maps, rainfall feature the clustering is rainfall characteristics tightly related to the centred stemflow variable. The Finally, stepwise regressions were operated to identify the most influential rainfall factor could then be identified with stepwise

353 ~~regression characteristics~~ (Carlyle-Moses and Schooling, 2015). ~~We built regression~~  
354 ~~models~~ The quantitative relations were established in terms of the qualified level of  
355 significance ( $p < 0.05$ ) and the highest coefficient of determination ( $R^2$ ). One-way analysis  
356 of variance (ANOVA) with LSD post hoc test was used to determine whether rainfall  
357 characteristics, and stemflow variables significantly differed among event categories, and  
358 whether funnelling ratio and stemflow intensity significantly differed among BD categories  
359 for *C. korshinskii* and *S. psammophila*. The level of significance was set at 95% confidence  
360 interval ( $p = 0.05$ ). SPSS 21.0 (IBM Corporation, USA), Origin 8.5 (OriginLab Corporation,  
361 USA) and Excel 2019 (Microsoft Corporation, USA) were used for data analysis.

### 362 **3 Results**

#### 363 **3.1 Rainfall characteristics**

364 ~~Stemflow was automatically recorded for 54 rainfall events during the experimental~~  
365 ~~period (Fig. 2). There were~~ A total of 20, 8, 10, 8, 4 and 4 rainfall events were recorded in  
366 the RA categories of  $\leq 2$  mm, 2–5 mm, 5–10 mm, 10–15 mm, 15–20 mm and  $> 20$  mm,  
367 respectively. ~~The corresponding~~ total RAs ~~of the above five rainfall~~ at these categories were  
368 22.1 mm, 26.1 mm, 68.8 mm, 93.3 mm, 74.8 mm and 110.0 mm, respectively. ~~The~~ During  
369 these events, the average  $I$ ,  $I_{10}$ ,  $I_{b10}$  and  $I_{e10}$  ~~of the 54 rainfall events~~ were  $4.65 \pm 1.0$  mm·h<sup>-1</sup>,  
370 ~~11.5~~ 10.9  $\pm 2.1$  mm·h<sup>-1</sup>, ~~5.85~~ 5.4  $\pm 1.54$  mm·h<sup>-1</sup> and ~~2.98~~ 2.9  $\pm 0.7$  mm·h<sup>-1</sup>, respectively. The average  $F$ ,  
371  $F_{10}$ ,  $F_{b10}$  and  $F_{e10}$  were ~~16.3~~ 8.71  $\pm 1.2$  mg·m·s<sup>-1</sup>, ~~25.7~~ 24.9  $\pm 1.4$  mg·m·s<sup>-1</sup>, ~~18.5~~ 9.94  $\pm 1.4$   
372 mg·m·s<sup>-1</sup> and ~~15.8~~ 716.0  $\pm 1.0$  mg·m·s<sup>-1</sup>, respectively.  $RD$ , RI and ~~RHE~~ averaged  $4.97 \pm 0.8$  h  
373 ~~and~~, 50.96  $\pm 6.1$  h, and 0.9  $\pm 0.2$ , respectively. ~~—~~ (Table 2).

374 Rainfall events were further categorized in terms of rainfall-intensity peak amount,

375 including Events A, ~~B and C, with (the single-peak events), B (the double-peak events)~~  
376 and C (the multiple-peaks (peak events). There were 17, 11 and 15 events at Event A, B  
377 and C, respectively) (Table 2). The. Because the remaining 11 events had the average RA of  
378 0.6 mm, no more than three recordings had been observed within event which was limited  
379 by 0.2-mm resolution of TBRGs. Therefore, they could not be categorized ~~due to less than~~  
380 ~~three intra-event recordings and grouped as Event others (Table 2).~~ Compared with Events  
381 A and B, Event C possessed significantly different rainfall characteristics, e.g., at the  
382 significantly larger RA (11.7 vs. 4.1 and 5.2 mm) and RD (10.3 vs. 2.5 and 3.6 h) but at the  
383 significantly smaller  $I_{10}$  (9.5 vs. 15.5 and 12.7  $\text{mm}\cdot\text{h}^{-1}$ ),  $I_{b10}$  (2.8 vs. 7.7 and 9.9  $\text{mm}\cdot\text{h}^{-1}$ ),  
384  ~~$I_{e10}$  (2.1 vs. 4.3 and 3.6  $\text{mm}\cdot\text{h}^{-1}$ ),  $F_{10}$  (24.2 vs. 27.8 and 26.6  $\text{mg}\cdot\text{m}\cdot\text{s}^{-1}$ ),  $F_{b10}$  (15.4 vs. 19.7~~  
385 ~~and 21.7  $\text{mg}\cdot\text{m}\cdot\text{s}^{-1}$ ) and  $F_{e10}$  (13.4 vs. 17.3 and 16.6  $\text{mg}\cdot\text{m}\cdot\text{s}^{-1}$ ), the non-significantly  
386 smaller  $I_{e10}$  (2.1 vs. 4.3 and 3.6  $\text{mm}\cdot\text{h}^{-1}$ ),  $F_{10}$  (24.2 vs. 27.8 and 26.6  $\text{mg}\cdot\text{m}\cdot\text{s}^{-1}$ ); and E (0.4  
387 vs. 0.9 and 1.0), respectively) (Table 2).~~

388 In general, the rainfall events were ~~skewed in their distributions~~ skewedly distributed in  
389 terms of RA ~~during the experimental period~~. The occurrences of events with a  $\text{RA} \leq 2$  mm  
390 dominated the experimental period (40.7%), but the events with  $\text{RA} > 20$  mm were the  
391 greatest contributor to the total RA (28.0%). However, a relatively equal distribution was  
392 noted during events with single (17 events), double (11 events) and multiple (15 events)  
393 rainfall-intensity peaks. ~~In contrast~~ Comparatively, the multiple-~~intensity~~ peak events had  
394 significantly larger rainfall amounts, durations, intensities and raindrop momentums ~~(Table~~  
395 ~~2). Therefore, grouping events in terms of rainfall intensity peak amounts was justified.~~

396 **3.2 Stemflow volume, intensity, funnelling ratio and temporal dynamics**

397 ~~The stemflow~~Stemflow variables of *C. korshinskii* and *S. psammophila* showed great  
398 inter-event variations during the experimental period (Fig. 3). *C. korshinskii* had larger SFV,  
399 SFI, SFI<sub>10</sub>, FR, SFD, TLG and TLE (~~1658~~226.6±46.4±320.9 mL, ~~20.3±10.4~~17.5±82.1  
400 mm·h<sup>-1</sup>, ~~2057.6±399.7~~130.7±8.2, 3.8±0.8 h, 66.2±10.6 min and 20.0±5.3 min,  
401 respectively) but ~~significantly~~ smaller TLM (109.4±20.5 min) ~~and slightly smaller SFI~~  
402 ~~(4.7±1.5~~mm·h<sup>-1</sup>)—than those of *S. psammophila* (~~1014.0±174~~172.1±34.5 mL,  
403 ~~16.9±8.8~~367.3±91.1 mm·h<sup>-1</sup>, 1132.2±214.3 mm·h<sup>-1</sup>, 101.6±10.4, 3.4±0.9 h, 54.8±11.7 min,  
404 13.5±17.2 min, and 120.5±22.1 min, ~~4.8±1.6~~mm·h<sup>-1</sup>, respectively) (Table 3). ~~The positive~~  
405 ~~TLG, TLE~~During the 54 events, no negative values were observed for TLG and TLM but  
406 TLE. It indicated that both species stemflow generally ~~started, initiated and~~ maximized ~~and~~  
407 after rains started for both species. However, stemflow might be ended before (negative  
408 TLE) and after (positive TLE) rains ~~ceased stemflow later than the rains.~~

409 ~~As shown in Fig. 4, stemflow was~~ Stemflow well synchronized to rains with similar  
410 intensity peak shapes, amounts and positions for ~~the two~~both species. ~~This result was~~ These  
411 results were vividly demonstrated ~~during~~at representative ~~events~~rains with different  
412 intensity peak amounts and RAs, including ~~the rainfall~~ events on July 17, 2015 (Event A,  
413 20.7 mm, ~~Event A~~), ~~on~~ July 29, 2015 (~~7.3 mm~~, Event B, 7.3 mm), and ~~on~~ September 10,  
414 2015 (Event C, 13.3 mm, ~~Event C~~). ~~For these three events,~~ (Fig. 4). *C. korshinskii* had  
415 larger ~~RSFIs~~ (~~2~~, FR<sub>100</sub> (91.7, 76.1 and 2.194.0, respectively) than those of *S.*  
416 *psammophila* (1.4, 0.932.8, 26.3 and 1.443.7, respectively). ~~Comparatively, the RSFI~~  
417 during representative events. It indicated a comparatively greater ability of S. psammophila  
418 fluctuated more dramatically around the value of 1. converging rains for C. korshinskii

419 within event.

420 Stemflow variables varied between rainfall event categories (~~Table 3~~). For Event C in  
421 comparison to Events A and B, *S. psammophila* had significantly larger SFV (~~2469.0~~435.2  
422 vs. ~~616.5~~102.6 and ~~907.0~~145.7 mL), SFD (~~8.23~~ vs. 1.2 and 3.4 h), TLM (235.8 vs. 64.3 and  
423 93.4 min) ~~and~~, FR (~~129.1 vs. 77.1 and 91.4~~), non-significantly larger TLE (20.8 vs. 17.1  
424 and 8.6 min) but significantly smaller SFI (~~2.4~~246.6 vs. ~~7.2~~648.1 and ~~6.0~~421.5 mm·h<sup>-1</sup>) and  
425 SFI<sub>10</sub> (~~8.8888.4~~ vs. ~~24.8~~1672.7 and ~~24.5~~1582.8 mm·h<sup>-1</sup>), respectively). ~~For Event C in~~  
426 ~~comparison to~~ (Table 3). SFI decreased at events with increasing intensity peak amounts  
427 as shown at Events A and B, C. The drop of SFI was offset by the decreasing I to some  
428 extent (Table 2), which might partly explain the increasing trend of FR from Event A to C.

429 *C. korshinskii* shared similar changing trends ~~for its~~of stemflow variables between event  
430 categories with those of *S. psammophila*, except for the ~~slightly~~non-significantly smaller  
431 TLE (18.5 ~~vs. min~~) at Event C in contrast to TLE at Event A and B (22.3 and 18 and 18.7  
432 min).

433 Funnelling ratio and SFI (5.1 vs. 5.7 stemflow intensity negatively related with branch  
434 size. *C. korshinskii* and *S. psammophila* had significantly greater FR, SFI, and SFI<sub>10</sub> at  
435 the 5–10 mm·h<sup>-1</sup> branches than those at the larger branches (Table 4). For *C. korshinskii*,  
436 FR decreased from 163.7±12.2 at the 5–10-mm branches to 97.7±9.2 at the 18–25-mm  
437 branches, respectively). It was consistent with decreasing SFI (333.8–716.2 mm·h<sup>-1</sup>) at the  
438 corresponding BD categories (Table 4). As branch size increased, *S. psammophila* shared  
439 similar decreasing trends of FR (44.2–212.0) and SFI (197.2–738.7 mm·h<sup>-1</sup>), respectively.

### 440 **3.3 Relationships between stemflow variables and rainfall characteristics**



441 ~~Correspondence had been established~~*C. korshinskii* and *S. psammophila* had similar  
442 correspondence patterns between rainfall characteristics and stemflow variables ~~for *C.*~~  
443 ~~*korshinskii* and *S. psammophila* (Fig. 5). These two species had similar correspondence~~  
444 ~~patterns.~~ As shown in Fig. 5, the one-to-one correspondences were observed for SFV, ~~SFD~~  
445 and TLE. The larger (or smaller) SFV, ~~SFD~~ and TLE corresponded to the larger (or smaller)  
446 RA, ~~RD~~ and RI, respectively. This result ~~clearly~~ demonstrated the dominant influences of  
447 RA, ~~RD~~ and RI on SFV, ~~SFD~~ and TLE, respectively. ~~Nevertheless,~~The one-to-two  
448 correspondences was noted for SFD with RD and E. The larger (or smaller) SFD  
449 corresponded to the larger (or smaller) RD and smaller (or larger) E. RA had been  
450 identified as the dominant rainfall characteristic affecting FR based on the analysis for 53  
451 branches of *C. korshinskii* and 98 branches of *S. psammophila* at the same plots during the  
452 same experimental period (Yuan et al., 2017). It seemed that event-based stemflow  
453 production (the volume, duration and efficiency) were strongly influenced by rainfall  
454 characteristics at inter-event scale (the rainfall amount and duration).

455 The one-to-more correspondences were ~~noted~~observed for TLM, TLG, SFI and SFI<sub>10</sub>.  
456 The larger (or smaller) TLM and TLG were, the smaller SFI and SFI<sub>10</sub> were, and all  
457 corresponded to the smaller (or larger) rainfall characteristics of I, I<sub>10</sub>, I<sub>b10</sub>, I<sub>e10</sub>, F, F<sub>10</sub>, F<sub>b10</sub>  
458 and F<sub>e10</sub>. ~~In contrast, the~~The same correspondences were applied to the larger (or smaller  
459 TLM) TLG, and TLG were, the smaller (or larger) SFI and SFI<sub>10</sub> were, and all  
460 corresponded to the larger rainfall characteristics of I, I<sub>10</sub>, I<sub>b10</sub>, I<sub>e10</sub>, F, F<sub>10</sub>, F<sub>b10</sub> and F<sub>e10</sub>.  
461 This result indicated. It seemed that the within-event stemflow processes (SFI, SFI<sub>10</sub>, TLG  
462 and TLM) were strongly affected by rainfall characteristics at intra-event scale (the rainfall

463 intensity and raindrop momentum. ~~The~~). Therefore, these results indicated that rainfall  
464 characteristics influenced ~~the~~ stemflow variables at the corresponding temporal scales. This  
465 influence occurred at the inter-event scale between SFV and RA, FR and RA, SFD and RD,  
466 ~~while this influence occurred and~~ at the intra-event scale for stemflow time lags (TLG and  
467 TLM) and intensities (SFI and SFI<sub>10</sub>) with rainfall intensity (I, I<sub>10</sub>, I<sub>b10</sub> and I<sub>e10</sub>) and  
468 raindrop momentum (F, F<sub>10</sub>, F<sub>b10</sub> and F<sub>e10</sub>). The only exception ~~of mismatched temporal~~  
469 ~~sales~~ was noted between TLE and RI for the mismatched temporal sales.

470 ~~To identify~~ Stepwise regression analysis identified the most influential rainfall  
471 characteristics affecting stemflow intensities and ~~time lags, stepwise regression temporal~~  
472 ~~dynamics. RD~~ was ~~performed and indicated that~~ the dominant rainfall characteristics  
473 affecting SFD. I<sub>10</sub> significantly affected the TLM of the both ~~shrub~~ species. For *C.*  
474 *korshinskii*, I, I<sub>10</sub> and F were the most influential factors on SFI, SFI<sub>10</sub> and TLG,  
475 respectively. However, for *S. psammophila*, F, F<sub>10</sub> and F<sub>b10</sub> significantly affected SFI, SFI<sub>10</sub>  
476 and TLG, respectively. ~~There~~ The results of multiple regression analyses indicated that  
477 there were linear relationships between SFI and I ( $R^2=0.8574$ ,  $p<0.01$ ) and SFI<sub>10</sub> and I<sub>10</sub>  
478 ( $R^2=0.9085$ ,  $p<0.01$ ) for *C. korshinskii* and between SFD and RD for *C. korshinskii*  
479 ( $R^2=0.95$ ,  $p<0.01$ ) and *S. psammophila* ( $R^2=0.92$ ,  $p<0.01$ ) (Fig. 6). Moreover, power  
480 functional relations were found between SFI and F ( $R^2=0.82$ ,  $p<0.01$ ), SFI<sub>10</sub> and F<sub>10</sub>  
481 ( $R^2=0.90$ ,  $p<0.01$ ) (Fig. 6), TLG and F<sub>b10</sub> ( $R^2=0.55$ ,  $p<0.01$ ) and TLM and I<sub>10</sub> ( $R^2=0.40$ ,  
482  $p<0.01$ ) (Fig. 7) for *S. psammophila*, and TLG and F ( $R^2=0.56$ ,  $p<0.01$ ) and TLM and I<sub>10</sub>  
483 ( $R^2=0.38$ ,  $p<0.01$ ) (Fig. 7) for *C. korshinskii*. However, there was no significant  
484 quantitative relationship between TLE and RI for *C. korshinskii* ( $R^2=0.005$ ,  $p=0.28$ ) or *S.*

---

485 *psammophila* ( $R^2=0.002$ ,  $p=0.78$ ) (Fig. 7).

## 486 4 Discussion

### 487 4.1 Stemflow intensity and funnelling ratio

488 Stemflow intensity is generally greater than rainfall intensity ~~for~~at different plant life  
489 forms. The xerophytic shrubs of *C. korshinskii* and *S. psammophila* had larger average  
490 stemflow intensities than the average rainfall intensity (~~4.7±1.5~~17.5 and ~~4.8±1.6~~367.3  
491  $\text{mm}\cdot\text{h}^{-1}$ , ~~respectively~~, vs. ~~4.5±1.0~~  $\text{mm}\cdot\text{h}^{-1}$ ) ~~in this study~~. Broadleaf and coniferous species  
492 (*Quercus pubescens* Willd. and *Pinus sylvestris* L., respectively) also have larger ~~average~~  
493 maximum stemflow intensities than the maximum rainfall intensity in north-eastern Spain  
494 (Cayuela et al., 2018). The gap between stemflow and rainfall ~~intensity~~intensities generally  
495 increased as the recording time intervals decreased. While recording at the 1-h intervals,  
496 approximately 20-, 17-, 13- and 2.5-fold greater peak stemflow intensities had been  
497 observed for trees of Cedar, Birch, Douglas Fir and Hemlock, respectively, at the coastal  
498 British Columbia forest (Spencer and Meerveld, 2016). For *C. korshinskii* and *S.*  
499 *psammophila*, in comparison to  $I_{10}$  (~~10.9±2.1~~  $\text{mm}\cdot\text{h}^{-1}$ ) at 10-min intervals, the  $SFI_{10}$   
500 (~~20.3±10.4~~2057.6 and ~~16.9±8.8~~1132.2  $\text{mm}\cdot\text{h}^{-1}$ , respectively) was ~~1.5-fold greater~~. ~~When~~  
501 ~~recorded at 5-min intervals,  $SFI_5$  (1232  $\text{mm}\cdot\text{h}^{-1}$ ) is as much as 15~~over 103.9-fold greater.  
502 The recordings at 6-min interval indicated a 157-fold larger of stemflow intensity (18840  
503  $\text{mm}\cdot\text{h}^{-1}$ ) than rainfall intensity (120  $\text{mm}\cdot\text{h}^{-1}$ ) in the ~~open~~cyclone-prone tropical rainforest ~~of~~  
504 Brazil (Germer et al., 2010) with extremely high MAP of 6570 mm (Herwitz, 1986). While  
505 calculating the dynamic time interval between neighbouring tips of ~~the tipping bucket rain~~  
506 ~~gauges~~TBRG,  $SFI_i$  (~~240~~10816.2  $\text{mm}\cdot\text{h}^{-1}$ ) was ~~3.3~~150.2-fold greater than the corresponding

---

507 rainfall intensity ( $72 \text{ mm} \cdot \text{h}^{-1}$ ). Therefore, stemflow recorded at a higher temporal resolution  
508 ~~provided~~might provide more information into the dynamic nature of stemflow and  
509 real-time responses to rainfall characteristics within events.

510 Greater stemflow intensity than rainfall intensity is hydrologically significant ~~in~~at  
511 terrestrial ecosystems. This scenario indicates the convergence of the canopy-intercepted  
512 rains into the limited area around ~~the~~ trunk or branch bases within a certain time period.  
513 ~~The funnelling ratio, i.e., 8.0% and 3.5% of rains being directed to the trunk base only~~  
514 ~~accounting for 0.3% and 0.4% of plot area in the open rainforest (Germer et al., 2010) and~~  
515 ~~undisturbed lowland tropical rainforest (Manfroi et al., 2004), respectively. Besides, FR,~~  
516 which ~~quantifies the efficiency of individual plants in capturing and delivering~~  
517 ~~raindrops~~compared SFV with RA that would have been collected at the same area as the  
518 basal area at an event scale (~~Siegert and Levia, 2014~~Herwitz, 1986), is commonly applied  
519 to assess the convergence effect (~~Herwitz, 1986; Wang et al., 2013~~via stemflow volume,  
520 rainfall amount and basal area (Carlyle-Moses et al., 2010; Siegert and Levia, 2014; Fan et  
521 al., 2015); Yang et al., 2019). If ~~the funnelling ratio~~FR is greater than 1, ~~then~~ more water is  
522 collected at the trunk or branch base than at the clearings ~~during incident rains.~~ Both  
523 methods successfully quantified the convergence effects of stemflow. However, the  
524 ~~process~~former provided a possibility to assess ~~the convergence effect of stemflow it at high~~  
525 temporal resolutions within ~~events~~ has still not been adequately studied event.

526 ~~RSFI depicted the intra-event convergence effects of stemflow by comparing stemflow~~  
527 ~~and rainfall intensities at 100 s intervals starting from the beginning to the ending of~~  
528 ~~incident rains. We found that RSFI fluctuated around the value of 1 for both shrub species~~

(Fig. 4). The RSFI was generally greater than 1 for *C. korshinskii*, whereas the RSFI for *S. psammophila* fluctuated more dramatically. This result indicated that comparatively more rainwater was delivered within a short period to the branch base of *C. korshinskii* during the rain process. This result agreed with the results of reports related to the more efficient stemflow production of *C. korshinskii* at the event scale, as expressed by its larger stemflow productivity ( $1.95 \text{ mL}\cdot\text{g}^{-1}$ ) and funnelling ratio (173.3) than those of *S. psammophila* ( $1.19 \text{ mL}\cdot\text{g}^{-1}$  and 69.3, respectively) (Yuan et al., 2017). Therefore, RSFI demonstrated the process-based estimation of stemflow efficiency. Carlyle Moses et al. (2018) have addressed the importance of studying stemflow convergence effects by employing the funnelling ratio at the stand scale. We highly recommended that future studies evaluate convergence effects during rain events by combining the results of the funnelling ratio and RSFI.

This study established the quantitative connection between FR and stemflow intensity for the first time. As per Equation 14 and the average stemflow and rainfall intensities listed at Table 2 and 3, FR could be estimated to be 115.0 and 81.6 for *C. korshinskii* and *S. psammophila*, respectively. Those results approximately agreed with FR of 173.3 and 69.3 (Yuan et al., 2017) and 124.9 and 78.2 (Yang et al., 2019) for the two species by applying the traditional calculation based on SFV and RA (Herwitz, 1986). As branch size increased, FR of *C. korshinskii* decreased from 163.7 at the 5–10-mm branches to 97.7 at the 18–25-branches. The decreasing trend of FR of *S. psammophila* were also noted in the range of 44.2–212.0 with increasing BD. The negative relation between BD and FR agreed with the reports for trees and babassu palms in an open tropical rainforest in Brazil (Germer et al.,

---

551 2010), the mixed-species coastal forest at British Columbia of Canada (Spencer and  
552 Meerveld, 2016), for trees (*Pinus tabuliformis* and *Armeniaca vulgaris*) and shrubs (*C.*  
553 *korshinskii* and *S. psammophila*) on the Loess Plateau of China (Yang et al., 2019). It might  
554 be partly explained by the decreasing stemflow intensities with increasing branch size as  
555 per Equation 14. Our results found that SFI decreased from 716.2 to 333.8 for *C.*  
556 *korshinskii*, and 738.7 to 197.2 for *S. psammophila* as branch size increased (Table 4). It  
557 well justified the importance of branch size on stemflow intensity. Associated with the  
558 infiltration rate, the stemflow-induced hydrological process might be strongly affected, i.e.,  
559 soil moisture recharge, Hortonian overland flow (Herwitz, 1986), Saturation overland flow  
560 (Germer et al., 2010), soil erosion (Liang et al., 2011), nutrient leaching (Corti et al., 2019),  
561 etc. Therefore, more attention should be paid to tree/branch size and size-related stand age  
562 at future studies while modeling the stemflow-induced terrestrial hydrological fluxes.

563 The importance had been addressed to study the funnelling ratio at the stand scale  
564 (Carlyle-Moses et al., 2018); however, it had not been adequately studied at the intra-event  
565 scale. This study calculated the average funnelling ratio at the event base and the 100-s  
566 intervals after rain began. Thus, the convergence effect of stemflow could be better  
567 understood at the inter-/intra-event scales. Our results found that  $FR_{100}$  were over 1.8-fold  
568 greater than FR of *C. korshinskii* (282.7 vs. 130.7) and *S. psammophila* (203.4 vs. 101.6),  
569 respectively. It indicated that funnelling ratio fluctuated dramatically within event.  
570 Therefore, computing FR at event and ignoring it at high temporal resolutions within event  
571 might underestimate the eco-hydrological significance of stemflow.

572 In general, stemflow intensity highly related to funnelling ratio. For addressing its

---

573 eco-hydrological importance, stemflow intensity should be precisely defined. It had been  
574 expressed as the stemflow volume per basal area of branches/trunks per unit time with the  
575 unit of  $\text{mm}\cdot\text{h}^{-1}$  (Herwitz, 1986; Spencer and Meerveld, 2016) and  $\text{mm}\cdot 5 \text{ min}^{-1}$  (Cayuela et  
576 al., 2018). However, stemflow intensity had also been described as stemflow volume per  
577 unit time with the unit of  $\text{L}\cdot\text{week}^{-1}$  (Schimmack et al., 1993) and  $\text{L}\cdot\text{h}^{-1}$  (Liang et al., 2011;  
578 Germer et al., 2013). We highly recommended the former definition. Because of its highly  
579 spatial-related (Herwitz, 1986; Liang et al., 2011; 2014), the eco-hydrological significance  
580 of stemflow would be underestimated by ignoring the basal area, over which stemflow was  
581 received. Moreover, as per this definition, stemflow intensity quantitatively connected with  
582 funnelling ratio via Equation 14. Thus, funnelling ratio could be used to assess the  
583 convergence effect of stemflow at both inter- and intra-event scales.

#### 584 **4.2 Stemflow temporal dynamics**

585 Stemflow ~~was~~ well synchronized to the rains. ~~This result~~It agreed with ~~those~~the report  
586 of Levia et al. (2010), who demonstrated a marked synchronicity between ~~stemflow~~  
587 ~~volume~~SFV and RA in 5-min intervals for *Fagus. grandifolia*. The duration and time lags  
588 to rains were critical to describe stemflow temporal dynamics. Our results indicated that in  
589 comparison to *S. psammophila*, *C. korshinskii* takes a longer time to initiate (66.2 vs. 54.8  
590 min), end (20.0 vs. 13.5 min) and produce stemflow (3.8 vs. 3.4 h) but a shorter time to  
591 maximize stemflow (109.4 vs. 120.5 min, respectively). Moreover, the TLMs of both ~~shrub~~  
592 species were in the range of the TLMs for *S. psammophila* (20–210 min) in the Mu Us  
593 desert of China (Yang, 2010).

594 Varying TLGs were documented for different species. Approximately 15 min, 1 h and

---

595 1.5 h ~~are~~were needed to initiate the stemflow of palms (Germer, 2010), pine trees and oak  
596 trees (Cayuela et al., 2018), respectively. In addition, an almost instantaneous start of  
597 stemflow ~~has~~had also been observed as rain began for *Quercus rubra* (Durocher, 1990),  
598 *Fagus grandifolia* and *Liriodendron tulipifera* (Levia et al., 2010). ~~In contrast~~Compared to  
599 the positive TLE dominating xerophytic shrubs, the TLE greatly ~~varies~~varied with tree  
600 species. TLE ~~is~~was as much as 48 h for Douglas fir, oak and redwood in California, USA  
601 (Reid and Levia, 2009), and almost 11 h for palm trees in Brazil (Germer, 2010). However,  
602 for sweet chestnut and oak, almost no stemflow ~~continues~~continued when rains  
603 ~~ease~~ceased in Bristol, England (Durocher, 1990). These scenarios might occur due to the  
604 sponge effect of the canopy surface (Germer, 2010), which ~~buffers~~buffered stemflow  
605 generation, maximization and cessation before saturation. These conclusions were  
606 consistent with the smaller stemflow intensities of *C. korshinskii* and *S. psammophila* than  
607 the rainfall intensity when rain began, as part of the rains was used to wet canopies (Fig. 4).  
608 The hydrophobic bark traits ~~benefit~~benefited stemflow initiation with the limited time lags  
609 to rains. In contrast, the hydrophilic bark traits ~~are~~were conducive for continuing stemflow  
610 after rain ~~stops~~ceased, which ~~keep~~kept the preferential flow paths wetter for longer time  
611 periods (Levia and Germer, 2015). As a result, it ~~take~~took time to transfer intercepted rains  
612 from the leaf, branch and trunk to the base. This process strongly affects the stemflow  
613 volume, intensity and loss as evaporation.

614 The dynamics of intra-event rainfall intensity ~~complicates~~complicated the stemflow  
615 time lags to rains. A 1-h lag to begin and stop stemflow with the beginning and ending of  
616 rains ~~was~~had been observed for ashe juniper trees during high-intensity events, but no



---

617 stemflow was generated at low-intensity storms (Owens et al., 2006). Rainfall intensity was  
618 an important dynamic rainfall characteristic affecting stemflow volume. Owens et al. (2006)  
619 found the most significant difference between various rainfall intensities located in the  
620 stemflow patterns other than throughfall and interception loss. During events with a  
621 front-positioned, single rainfall-intensity peak, *S. psammophila* maximized stemflow in a  
622 shorter time than *C. korshinskii* did in the Mu Us desert (30 and 50 min) (Yang, 2010).  
623 ~~During these events, a smaller SFD (1.5 h) and a larger TLE (55.8 min) and SFI (11.5~~  
624 ~~mm h<sup>-1</sup>) were also observed for *C. korshinskii* than for *S. psammophila* in this study. This~~  
625 ~~result~~ These results highlighted the amounts and occurrence time of rainfall-intensity peak  
626 affecting the stemflow process, which was consistent with the finding of Dunkerley  
627 (~~2014~~2014b).

628 Raindrops presented rainfall characteristics at finer temporal-spatial scales. They  
629 ~~are~~were usually ignored because rains were generally regarded as a continuum rather than a  
630 discrete process consisting of individual raindrops of various sizes, velocities, inclination  
631 angles and kinetic energies. Raindrops hit the canopy surface and ~~create~~created splashes at  
632 different canopy layers (Bassette and Bussière, 2008; Li et al., 2016). This process  
633 ~~accelerates~~accelerated canopy wetting and ~~increases—the~~increased water supply for  
634 stemflow production. Therefore, raindrop momentum was introduced in this study to  
635 represent the comprehensive effects of raindrop attributes. Our results indicated that  
636 raindrop momentum was sensitive to predicting the variations in stemflow intensity and  
637 temporal dynamics with significant linear or power functional relations (Figs. 6 and 7).  
638 Compared with the importance of rainfall intensity for *C. korshinskii*, raindrop momentum

---

639 more significantly affected the stemflow process of *S. psammophila*. This result might be  
640 related to the larger canopy size and height of *S. psammophila* ( $21.4 \pm 5.2 \text{ m}^2$  and  $3.5 \pm 0.2 \text{ m}$ )  
641 than that of *C. korshinskii* ( $5.1 \pm 0.3 \text{ m}^2$  and  $2.1 \pm 0.2 \text{ m}$ , respectively). ~~Thus, more~~ More  
642 layers ~~are~~ were available within canopies of *S. psammophila* to intercept the splashes  
643 created by raindrop striking (Bassette and Bussière, 2008; Li et al., 2016), thus shortening  
644 the paths and having more water supply for stemflow production.

#### 645 **4.3 Temporal-dependent influence of rainfall characteristics**

646 This study discussed stemflow variables and rainfall characteristics at ~~different~~  
647 ~~temporal scales. Stemflow variables were further categorized into volume, intensity and~~  
648 ~~temporal dynamics. The last two variables depicted the stemflow process with a high~~  
649 ~~temporal resolution. The influences of rainfall characteristics were explored at a fine~~  
650 ~~temporal scale by introducing raindrop momentum, rainfall intensity peak amounts and~~  
651 ~~intra-event positions.~~ inter-/intra-event scales. We found that rainfall characteristics affected  
652 stemflow variables at the corresponding temporal scales. RA and RD controlled SFV, FR  
653 and SFD, respectively, at the inter-event scale. However, stemflow intensity (e.g., SFI and  
654 SFI<sub>10</sub>) and temporal dynamics (e.g., TLG and TLM) were strongly influenced by rainfall  
655 intensity (e.g., I, I<sub>10</sub> and I<sub>b10</sub>) and raindrop momentum (e.g., F, F<sub>10</sub> and F<sub>b10</sub>) at the  
656 intra-event scales. These results were verified by the well-fitting linear or power functional  
657 equations among them (Figs. 6 and 7). Furthermore, the influences of rainfall intensity and  
658 raindrop momentum on stemflow process were species-specific. In contrast to the  
659 significance of rainfall intensity on the stemflow process of *C. korshinskii*, raindrop  
660 momentum imposed a greater influence on the stemflow process of *S. psammophila*.—

---

661 In general, rainfall characteristics had temporal-dependent influences on the  
662 corresponding stemflow variables. The only exception was found between TLE and RI. RI  
663 tightly corresponded to TLE for both species tested by the MCA, but there was no  
664 significant quantitative relationship between them ( $R^2=0.005$ ,  $p=0.28$  for *C. korshinskii*,  
665 and  $R^2=0.002$ ,  $p=0.78$  for *S. psammophila*). This result might be related to the mismatched  
666 temporal scales between TLE and RI. TLE represented stemflow temporal dynamics at the  
667 intra-event scale, while RI was the interval times between neighbouring rains at the  
668 inter-event scale. The mismatched temporal scales might also partly explain the  
669 long-standing debates on the controversial positive, negative and even no significant  
670 influences of rainfall intensity (depicting raining process at 5 min, 10 min, 60 min, etc.) on  
671 event-based stemflow volume (Owens et al., 2006; André et al., 2008; Zhang et al., 2015).—

## 672 **5 Conclusions**

673 Stemflow intensity and temporal dynamics are important in depicting the stemflow  
674 process and its interactions with rainfall characteristics within events. We categorized  
675 stemflow variables into the volume, intensity, funnelling ratio and temporal dynamics, thus  
676 to representing the stemflow yield, efficiency and process. Funnelling ratio had been  
677 calculated as the ratio between stemflow and rainfall intensities for the first time. It enabled  
678 it to assess the convergence of stemflow at different the inter-/intra-event scales. Over  
679 1.8-fold greater FR<sub>100</sub> were noted than FR at representative events for *C. korshinskii* and *S.*  
680 *psammophila*, respectively. The eco-hydrological significance of stemflow might be  
681 underestimated by ignoring stemflow production at high temporal scales-resolutions within  
682 event. FR decreased with increasing branch size of both species. It could be partly

---

683 explained by the decreasing trends of SFI as branch size increased. The influences of  
684 rainfall characteristics were quantified at a fine temporal scale by introducing SFI,  
685 RSFIFR<sub>100</sub>, raindrop momentum, rainfall-intensity peak amounts and intra-event positions.  
686 The results indicated that rainfall characteristics had temporal-dependent influences on  
687 stemflow variables. RA and RD controlled SFV, FR and SFD at the inter-event scale.  
688 Rainfall intensity and raindrop momentum significantly affected stemflow intensity and  
689 time lags to rains at the intra-event scale except for TLE. Although there was tight  
690 correspondence between TLE and RI by MCA, there was no significant quantitative  
691 relationship ( $R^2 < 0.005$ ,  $p > 0.28$ ) due to the mismatched temporal scale between them. These  
692 findings advance our understanding of the stemflow process and its influential mechanism  
693 and help model the critical process-based hydrological fluxes of terrestrial ecosystems.

694

695 *Data availability.* The data collected in this study are available upon request to the authors.

696

697 *Author contributions.* GYG and CY set up the research goals and designed field  
698 experiments. CY measured and analyzed the data. GYG and BJF provided the financial  
699 support for the experiments, and supervised the execution. CY created the figures and  
700 wrote the original draft. GYG, BJF, DMH, XWD and XHW reviewed and edited the draft  
701 in several rounds of revision.

702

703 *Competing interests.* The authors declare that they have no conflict of interest.

704

705 *Acknowledgements.* This research was sponsored by the National Natural Science  
706 Foundation of China (nos. 41390462 ~~and~~, 41822103 and 41901038), the National Key  
707 Research and Development Program of China (no. 2016YFC0501602), the Chinese  
708 Academy of Sciences (no. QYZDY-SSW-DQC025), the Youth Innovation Promotion  
709 Association CAS (no. 2016040), and the China Postdoctoral Science Foundation (no.  
710 2018M633427). We appreciate Prof. D. F. Levia in University of Delaware for reviewing  
711 and improving this manuscript. Thanks to Liwei Zhang for the catchment GIS mapping.  
712 Special thanks are given to Shenmu Erosion and Environment Research Station for  
713 experimental support to this research.

## 715 Appendix

### 716 List of symbols

| <u>Abbreviation</u>     | <u>Descriptions</u>                                                          | <u>Unit</u>                |
|-------------------------|------------------------------------------------------------------------------|----------------------------|
| <u>a.s.l.</u>           | <u>above sea level</u>                                                       | <u>NA</u>                  |
| <u>BA</u>               | <u>Branch angle</u>                                                          | <u>°</u>                   |
| <u>BBA</u>              | <u>Branch basal area</u>                                                     | <u>mm<sup>2</sup></u>      |
| <u>BD</u>               | <u>Branch diameter</u>                                                       | <u>mm</u>                  |
| <u>BL</u>               | <u>Branch length</u>                                                         | <u>cm</u>                  |
| <u>D</u>                | <u>Diameter of rain drop</u>                                                 | <u>mm</u>                  |
| <u>e<sub>s</sub></u>    | <u>Saturation vapor pressure</u>                                             | <u>kPa</u>                 |
| <u>E</u>                | <u>Evaporation coefficient</u>                                               | <u>unitless</u>            |
| <u>F</u>                | <u>Average raindrop momentum in the vertical direction of incident event</u> | <u>mg·m·s<sup>-1</sup></u> |
| <u>F<sub>0</sub></u>    | <u>Average raindrop momentum of incident event</u>                           | <u>mg·m·s<sup>-1</sup></u> |
| <u>F<sub>10</sub></u>   | <u>The 10-min maximum raindrop momentum</u>                                  | <u>mg·m·s<sup>-1</sup></u> |
| <u>F<sub>b10</sub></u>  | <u>Average raindrop momentum at the first 10 min</u>                         | <u>mg·m·s<sup>-1</sup></u> |
| <u>F<sub>e10</sub></u>  | <u>Average raindrop momentum at the last 10 min</u>                          | <u>mg·m·s<sup>-1</sup></u> |
| <u>FR</u>               | <u>Average funnelling ratio of incident event</u>                            | <u>unitless</u>            |
| <u>FR<sub>100</sub></u> | <u>Funnelling ratio at the 100-s intervals after rain begins</u>             | <u>unitless</u>            |
| <u>H</u>                | <u>Air relative humidity</u>                                                 | <u>%</u>                   |
| <u>I</u>                | <u>Average rainfall intensity of incident event</u>                          | <u>mm·h<sup>-1</sup></u>   |
| <u>I<sub>10</sub></u>   | <u>The 10-min maximum rainfall intensity</u>                                 | <u>mm·h<sup>-1</sup></u>   |
| <u>I<sub>b10</sub></u>  | <u>Average rainfall intensity at the first 10-min of incident event</u>      | <u>mm·h<sup>-1</sup></u>   |
| <u>I<sub>e10</sub></u>  | <u>Average rainfall intensity at the last 10-min of incident event</u>       | <u>mm·h<sup>-1</sup></u>   |

|                         |                                                                        |                          |
|-------------------------|------------------------------------------------------------------------|--------------------------|
| <u>IW<sub>A</sub></u>   | <u>The adjusted inflow water at TBRG</u>                               | <u>mm</u>                |
| <u>IW<sub>R</sub></u>   | <u>The recorded inflow water at TBRG</u>                               | <u>mm</u>                |
| <u>LA</u>               | <u>Leaf area of individual branch</u>                                  | <u>cm<sup>2</sup></u>    |
| <u>MAP</u>              | <u>Mean annual precipitation</u>                                       | <u>mm</u>                |
| <u>MCA</u>              | <u>Multiple correspondence analysis</u>                                | <u>NA</u>                |
| <u>NA</u>               | <u>Not applicable</u>                                                  | <u>NA</u>                |
| <u>p</u>                | <u>Level of significance</u>                                           | <u>NA</u>                |
| <u>R<sup>2</sup></u>    | <u>Coefficient of determination</u>                                    | <u>NA</u>                |
| <u>RA</u>               | <u>Rainfall amount</u>                                                 | <u>mm</u>                |
| <u>RD</u>               | <u>Rainfall duration</u>                                               | <u>h</u>                 |
| <u>RI</u>               | <u>Rainfall interval</u>                                               | <u>h</u>                 |
| <u>SE</u>               | <u>Standard error</u>                                                  | <u>NA</u>                |
| <u>SFD</u>              | <u>Stemflow duration from its beginning to ending</u>                  | <u>h</u>                 |
| <u>SFI</u>              | <u>Average stemflow intensity of incident event</u>                    | <u>mm·h<sup>-1</sup></u> |
| <u>SFI<sub>10</sub></u> | <u>The 10-min maximum stemflow intensity of incident event</u>         | <u>mm·h<sup>-1</sup></u> |
| <u>SFI<sub>i</sub></u>  | <u>Instantaneous stemflow intensity</u>                                | <u>mm·h<sup>-1</sup></u> |
| <u>SF<sub>RG</sub></u>  | <u>Stemflow depth recorded by TBRG</u>                                 | <u>mm</u>                |
| <u>SFV</u>              | <u>Stemflow volume</u>                                                 | <u>mL</u>                |
| <u>t<sub>i</sub></u>    | <u>Time intervals between neighboring tips</u>                         | <u>h</u>                 |
| <u>T</u>                | <u>Air temperature</u>                                                 | <u>°C</u>                |
| <u>TBRG</u>             | <u>Tipping bucket rain gauge</u>                                       | <u>NA</u>                |
| <u>TLE</u>              | <u>Time lag of stemflow ending to rainfall ceasing</u>                 | <u>min</u>               |
| <u>TLG</u>              | <u>Time lag of stemflow generation to rainfall beginning</u>           | <u>min</u>               |
| <u>TLM</u>              | <u>Time lag of stemflow maximization to rainfall beginning</u>         | <u>min</u>               |
| <u>v</u>                | <u>Terminal velocity of rain drop</u>                                  | <u>m·s<sup>-1</sup></u>  |
| <u>VPD</u>              | <u>Vapor pressure deficit</u>                                          | <u>kPa</u>               |
| <u>WS</u>               | <u>Wind speed</u>                                                      | <u>m·s<sup>-1</sup></u>  |
| <u>ρ</u>                | <u>Density of freshwater at standard atmospheric pressure and 20°C</u> | <u>g·cm<sup>-3</sup></u> |
| <u>θ</u>                | <u>Inclination angle of rain drop</u>                                  | <u>°</u>                 |

717

## 718 **References**

- 719 André, F., Jonard, M. and Ponette, Q.: Influence of species and rain event characteristics on  
720 stemflow volume in a temperate mixed oak-beech stand, *Hydrol. Process.*, 22, 4455–  
721 4466. <https://doi.org/10.1002/hyp.7048>, 2008.
- 722 Bassette, C. and Bussière, F.: Partitioning of splash and storage during raindrop impacts on  
723 banana leaves, *Agr., Forest Meteorol.*, 148, 991–1004,  
724 <https://doi.org/10.1016/j.agrformet.2008.01.016>, 2008.

---

725 Bittar, T.B., Pound, P., Whitetree, A., Moore, L.D. and ~~Vanyan~~ Stan John, T.: Estimation of  
726 throughfall and stemflow bacterial flux in a subtropical oak-cedar forest. *Geophys. Res.*  
727 *Lett.*, 45, 1410–1418, <https://doi.org/10.1002/2017GL075827>, 2018.

728 Brandt, C.J.: Simulation of the size distribution and erosivity of raindrops and throughfall  
729 drops. *Earth. Surf. Proc. Land.*, 15, 687–698, <https://doi.org/10.1002/esp.3290150803>,  
730 1990.

731 Bundt, M., Widmer, F., Pesaro, M., Zeyer, J. and Blaser, P.: Preferential flow paths:  
732 biological ‘hot spots’ in soils. *Soil. Biol. Biochem.*, 33, 729–738,  
733 [https://doi.org/10.1016/S0038-0717\(00\)00218-2](https://doi.org/10.1016/S0038-0717(00)00218-2), 2001.

734 Carlyle-Moses, D.E., Iida, S.I., Germer, S., Llorens, P., Michalzik, B., Nanko, K., Tischer,  
735 A. and Levia, D.F.: Expressing stemflow commensurate with its ecohydrological  
736 importance, *Adv. Water Resources*, 121, 472–479,  
737 <https://doi.org/10.1016/j.advwatres.2018.08.015>, 2018.

738 Carlyle-Moses, D.E. and Price, A.G.: Growing-season stemflow production within a  
739 deciduous forest of southern Ontario, *Hydrol. Process.*, 20, 3651–3663,  
740 <https://doi.org/10.1002/hyp.6380>, 2006.

741 Carlyle-Moses, D.E. and Schooling, J.: Tree traits and meteorological factors influencing  
742 the initiation and rate of stemflow from isolated deciduous trees, *Hydrol. Process.*, 29,  
743 4083–4099, <https://doi.org/10.1002/hyp.10519>, 2015.

744 [Carlyle-Moses, D.E., Park, A.D. and Cameron, J.L.: Modelling rainfall interception loss in](#)  
745 [forest restoration trials in Panama, \*Ecohydrology\*, 3, 272–283,](#)  
746 <https://doi.org/10.1002/eco.105>, 2010.

---

747 Cayuela, C., Llorens, P., Sánchez-Costa, E., Levia, D.F. and Latron, J.: Effect of biotic and  
748 abiotic factors on inter- and intra-event variability in stemflow rates in oak and pine  
749 stands in a Mediterranean mountain area, *J. Hydrol.*, 560, 396–406,  
750 <https://doi.org/10.1016/j.jhydrol.2018.03.050>, 2018.

751 [Corti, G., Agnelli, A., Cocco, S., Cardelli, V., Masse, J. and Courchesne, F.: Soil affects](#)  
752 [throughfall and stemflow under Turkey oak \(\*Quercus cerris\* L.\), \*Geoderma\*, 333, 43–56,](#)  
753 [<https://doi.org/10.1016/j.geoderma.2018.07.010>, 2019.](#)

754 Dawoe, E.K., Barnes, V.R. and Oppong, S.K.: Spatio-temporal dynamics of gross rainfall  
755 partitioning and nutrient fluxes in shaded-cocoa (*Theobroma cocoa*) systems in a  
756 tropical semi-deciduous forest, *Agroforst. Syst.*, 92, 397–413,  
757 <https://doi.org/10.1007/s10457-017-0108-3>, 2018.

758 [Dunkerley, D.L.: Stemflow production and intrastorm rainfall intensity variation: an](#)  
759 [experimental analysis using laboratory rainfall simulation, \*Earth. Surf. Proc. Land.\*, 39,](#)  
760 [1741–1752, <https://doi.org/10.1002/esp.3555>, 2014.](#)

761 Dunkerley, D.L.: Stemflow on the woody parts of plants: dependence on rainfall intensity  
762 and event profile from laboratory simulations, *Hydrol. Process.*, 28, 5469–5482,  
763 <https://doi.org/10.1002/hyp.10050>, 2014.

764 Dunkerley, D.L.: Rainfall intensity bursts and the erosion of soils: an analysis highlighting  
765 the need for high temporal resolution rainfall data for research under current and future  
766 climates, *Earth Surf. Dynam.*, 7, 345–360, <https://doi.org/10.5194/esurf-7-345-2019>,  
767 2019.

768 Durocher, M.G.: Monitoring spatial variability of forest interception, *Hydrol. Process.*, 4,



---

769 215–229, <https://doi.org/10.1002/hyp.3360040303>, 1990.

770 Fan, J.L., Baumgartl, T., Scheuermann, A. and Lockington, D.A.: Modeling effects of  
771 canopy and roots on soil moisture and deep drainage. *Vadose. Zone. J.*, 14, 1–18,  
772 <https://doi.org/10.2136/vzj2014.09.0131>, 2015.

773 Firn, R.: Plant intelligence: an alternative point of view, *Ann. Bot.*, 93, 345–351,  
774 <https://doi.org/10.1093/aob/mch058>, 2004.

775 [Gao, X.D., Zhao, X.N., Pan, D.L., Yu, L.Y. and Wu, P.T.: Intra-storm time stability analysis](#)  
776 [of surface soil water content, \*Geoderma\*, 352, 33–37,](#)  
777 <https://doi.org/10.1016/j.geoderma.2019.06.001>, 2019.

778 Garbelotto, M.M., Davidson, J.M., Ivors, K., Maloney, P.E., Hüberli, D., Koike, S.T. and  
779 Rizzo, D.M.: Non-oak native plants are main hosts for sudden oak death pathogen in  
780 California, *Calif. Agric*, 57, 18–23, <https://doi.org/10.3733/ca.v057n01p18>, 2003.

781 [Germer, S.: Development of near-surface perched water tables during natural and artificial](#)  
782 [stemflow generation by babassu palms, \*J. Hydrol.\*, 507, 262–272,](#)  
783 <http://dx.doi.org/10.1016/j.jhydrol.2013.10.026>, 2013.

784 ~~[Giacomin, A. and Trucchi, P.: Rainfall interception in a beech coppice \(Acquerino, Italy\). \*J.\*](#)~~  
785 ~~[Hydrol.](#), 137, 141–147, [https://doi.org/10.1016/0022-1694\(92\)90052-W](https://doi.org/10.1016/0022-1694(92)90052-W), 1992.~~

786 Germer, S., Werther, L. and Elsenbeer, H.: Have we underestimated stemflow? Lessons  
787 from an open tropical rainforest, *J. Hydrol.*, 395, 169–179,  
788 <https://doi.org/10.1016/j.jhydrol.2010.10.022>, 2010.

789 [Giacomin, A. and Trucchi, P.: Rainfall interception in a beech coppice \(Acquerino, Italy\). \*J.\*](#)  
790 [Hydrol.](#), 137, 141–147, [https://doi.org/10.1016/0022-1694\(92\)90052-W](https://doi.org/10.1016/0022-1694(92)90052-W), 1992.

---

791 Groisman, P.Y. and Legates, D.R.: The accuracy of United States precipitation data, B. Am.  
792 Meteorol. Soc., 75, 215–227,  
793 [https://doi.org/10.1175/1520-0477\(1994\)075<0215:TAOUSP>2.0.CO;2](https://doi.org/10.1175/1520-0477(1994)075<0215:TAOUSP>2.0.CO;2), 1994.

794 Hair, J.F., Anderson, R.E., Tatham, R.L. and Black, W.C.: Multivariate Data Analysis,  
795 fourth ed. Prentice Hall College Division, 745 p, 1995.

796 Herwitz, S.R.: Infiltration-excess caused by Stemflow in a cyclone-prone tropical rainforest,  
797 Earth Surf. Proc. Land, 11, 401–412, <https://doi.org/10.1002/esp.3290110406>, 1986.

798 ~~Herwitz, S.R. and Slye, R.E.: Three-dimensional modeling of canopy tree interception of~~  
799 ~~wind driven rainfall, J. Hydrol., 168, 1–4,~~  
800 ~~[https://doi.org/10.1016/0022-1694\(94\)02643-P](https://doi.org/10.1016/0022-1694(94)02643-P), 1995.~~

801 Hill, T. and Lewicki, P.: Statistics: Methods and Applications. Statsoft, Tulsa, 800 p, 2007.

802 Hu, R., Wang, X.P., Zhang, Y.F., Shi, W., Jin, Y.X. and Chen, N.: Insight into the influence  
803 of sand-stabilizing shrubs on soil enzyme activity in a temperate desert, Catena, 137,  
804 526–535, <http://dx.doi.org/10.1016/j.catena.2015.10.022>, 2016.

805 Iida, S., Levia, D.F., Shimizu, A., Shimizu, T., Tamai, K., Nobuhiro, T., Kabeya, N.,  
806 Noguchi, S., Sawano, S. and Araki, M.: Intrastorm scale rainfall interception dynamics  
807 in a mature coniferous forest stand, J. Hydrol., 548, 770–783,  
808 <https://doi.org/10.1016/j.jhydrol.2017.03.009>, 2017.

809 Iida, S., Shimizu, T., Kabeya, N., Nobuhiro, T., Tamai, K., Shimizu, A., Ito, E., Ohnuki, Y.,  
810 Abe, T., Tsuboyama, Y., Chann, S. and Keth, N.: Calibration of tipping-bucket flow  
811 meters and rain gauges to measure gross rainfall, throughfall, and stemflow applied to  
812 data from a Japanese temperate coniferous forest and a Cambodian tropical deciduous

---

813 [forest, Hydrol. Process., 26, 2445–2454, https://doi.org/10.1002/hyp.9462, 2012.](https://doi.org/10.1002/hyp.9462)

814 Jia, X.X., Shao, M.A., Wei, X.R. and Wang, Y. Q.: Hillslope scale temporal stability of soil  
815 water storage in diverse soil layers, J. Hydrol., 498, 254–264,  
816 <https://doi.org/10.1016/j.jhydrol.2013.05.042>, 2013.

817 Johnson, M.S. and Lehmann, J.: Double-funneling of trees: Stemflow and root-induced  
818 preferential flow, Ecoscience, 13, 324–333,  
819 <https://doi.org/10.2980/i1195-6860-13-3-324.1>, 2006.

820 Kéfi, S., Rietkerk, M., Alados, C.L., Pueyo, Y., Papanastasis, V.P., ElAich, A. and De Ruiter,  
821 P.C.: Spatial vegetation patterns and imminent desertification in Mediterranean arid  
822 ecosystems, Nature, 449, 213–217, <https://doi.org/10.1038/nature06111>, 2007.

823 Kimble, P.D.: Measuring the momentum of throughfall drops and raindrops. Master Thesis.  
824 Western Kentucky University, Bowling Green, 126 pp, 1996.

825 Levia, D.F. and Germer, S.: A review of stemflow generation dynamics and  
826 stemflow-environment interactions in forests and shrublands, Rev. Geophys., 53, 673-  
827 714, 2015, <https://doi.org/10.1002/2015RG000479>, 2015.

828 Levia, D.F., ~~Vanyan~~ Stan, J.T., Mage, S.M. and Kelley-Hauske, P.W.: Temporal variability  
829 of stemflow volume in a beech-yellow poplar forest in relation to tree species and size,  
830 J. Hydrol., 380, 112–120, <https://doi.org/10.1016/j.jhydrol.2009.10.028>, 2010.

831 [Liang, W.L., Kosugi, K. and Mizuyama, T.: Soil water dynamics around a tree on a  
832 hillslope with or without rainwater supplied by stemflow, Water Resour. Res.,  
833 <https://doi.org/10.1029/2010WR009856>, 2011.](https://doi.org/10.1029/2010WR009856)

834 [Liang, W.L., Kosugi, K. and Mizuyama, T.: Soil water redistribution processes around a](https://doi.org/10.1029/2010WR009856)

---

835 [tree on a hillslope: the effect of stemflow on the drying process, Ecohydrology, 8,](#)  
836 [1381–1395, <https://doi.org/10.1002/eco.1589>, 2014.](#)

837 Li X., Xiao, Q.F., Niu, J.Z., Dymond, S., van Doorn, N.S., Yu, X.X., Xie, B.Y., Lv, X.Z.,  
838 Zhang, K.B. and Li, J.: Process-based rainfall interception by small trees in Northern  
839 China: The effect of rainfall traits and crown structure characteristics, Agric. For.  
840 Meteorol., 218–219, 65–73, <https://doi.org/10.1016/j.agrformet.2015.11.017>, 2016.

841 Li, X.Y., Liu, L.Y., Gao, S.Y., Ma, Y.J. and Yang, Z.P.: Stemflow in three shrubs and its  
842 effect on soil water enhancement in semiarid loess region of China, Agric. For.  
843 Meteorol., 148, 1501–1507, <https://doi.org/10.1016/j.agrformet.2008.05.003>, 2008.

844 [Li, Y.Y., Chen, W.Y., Chen, J.C. and Shi, H.: Contrasting hydraulic strategies in \*Salix\*](#)  
845 [\*psammophila\* and \*Caragana korshinskii\* in the southern Mu Us Desert, China, Ecol.](#)  
846 [Res., 31, 869–880, <https://doi.org/10.1007/s11284-016-1396-1>, 2016.](#)

847 [Liu, Y.X., Zhao, W.W., Wang, L.X., Zhang, X., Daryanto, S. and Fang, X.N.: Spatial](#)  
848 [variations of soil moisture under \*Caragana korshinskii\* kom. from different](#)  
849 [precipitation zones: field based analysis in the Loess Plateau, China, Forests, 7,](#)  
850 [<https://doi.org/10.3390/f7020031>, 2016.](#)

851 Magliano, P.N., Whitworth-Hulse, J.I. and Baldi, G.: Interception, throughfall and stemflow  
852 partition in drylands: Global synthesis and meta-analysis, J. Hydrol., 568, 638–645,  
853 <https://doi.org/10.1016/j.jhydrol.2018.10.042>, 2019.

854 [Manfroi, O.J., Koichiro, K., Nobuaki, T., Masakazu, S., Nakagawa, M., Nakashizuka, T.](#)  
855 [and Chong, L.: The stemflow of trees in a Bornean lowland tropical forest, Hydrol.](#)  
856 [Process., 18, 2455–2474, <https://doi.org/10.1002/hyp.1474>, 2004.](#)

---

857 Martinez-Meza, E. and Whitford, W.: Stemflow, throughfall and channelization of  
858 stemflow by roots in three Chihuahuan desert shrubs, *J. Arid Environ.*, 32, 271–287,  
859 <https://doi.org/10.1006/jare.1996.0023>, 1996.

860 McClain, M.E., Boyer, E.W., Dent, C.L., Gergel, S.E., Grimm, N.B., Groffman, P.M., Hart,  
861 S.C., Harvey, J.W., Johnston, C.A. and Mayorga, E.: Biogeochemical hot spots and  
862 hot moments at the interface of terrestrial and aquatic ecosystems, *Ecosystems*, 6,  
863 301–312, <https://doi.org/10.1007/s10021-003-0161-9>, 2003.

864 Návar, J.: Stemflow variation in Mexico’s northeastern forest communities: Its contribution  
865 to soil moisture content and aquifer recharge, *J. Hydrol.*, 408, 35–42,  
866 <https://doi.org/10.1016/j.jhydrol.2011.07.006>, 2011.

867 Owens, M.K., Lyons, R.K. and Alejandro, C.L.: Rainfall partitioning within semiarid  
868 juniper communities: effects of event size and canopy cover, *Hydrol. Process.*, 20,  
869 3179–3189, <https://doi.org/10.1002/hyp.6326>, 2006.

870 Reid, L.M. and Lewis, J.: Rates, timing, and mechanisms of rainfall interception loss in a  
871 coastal redwood forest, *J. Hydrol.*, 375, 459–470,  
872 <https://doi.org/10.1016/j.jhydrol.2009.06.048>, 2009.

873 [Schimmack, W., Förster, H., Bunzl, K., and Kreutzer, K.: Deposition of radiocesium to the](#)  
874 [soil by stemflow, throughfall and leaf-fall from beech trees, \*Radiat. Environ. Bioph.\*,](#)  
875 [32, 137–150, <https://doi.org/10.1007/bf01212800>, 1993.](#)

876 Siegert, C.M. and Levia, D.F.: Seasonal and meteorological effects on differential stemflow  
877 funneling ratios for two deciduous tree species, *J. Hydrol.*, 519, 446–454,  
878 <https://doi.org/10.1016/j.jhydrol.2014.07.038>, 2014.

---

879 Spencer, S.A. and van Meerveld, H.J.: Double funnelling in a mature coastal British  
880 Columbia forest: spatial patterns of stemflow after infiltration, *Hydrol. Process.*, 30,  
881 4185–4201, <https://doi.org/10.1002/hyp.10936>, 2016.

882 [Sprengrer, M., Stumpp, C., Weiler, M., Aeschbach, W., Allen, S.T., Benettin, P., Dubbert, M.,](#)  
883 [Hartmann, A., Hrachowitz, M., Kirchner, J.W., McDonnell, J.J., Orłowski, N., Penna,](#)  
884 [D., Pfahl, S., Rinderer, M., Rodriguez, N., Schmidt, M. and Werner, C.: The](#)  
885 [Demographics of Water: A Review of Water Ages in the Critical Zone, \*Rev. Geophys.\*,](#)  
886 [57, 1–35, <https://doi.org/10.1029/2018RG000633>, 2019.](#)

887 Staelens, J., De Schrijver, A., Verheyen, K. and Verhoest N.E.: Rainfall partitioning into  
888 throughfall, stemflow, and interception within a single beech (*Fagus sylvatica* L.)  
889 canopy: influence of foliation, rain event characteristics, and meteorology, *Hydrol.*  
890 *Process.*, 22, 33–45, <https://doi.org/10.1002/hyp.6610>, 2008.

891 Teachey, M.E., Pound, P., Ottesen, E.A. and [Vanvan](#) Stan, J.T.: Bacterial community  
892 composition of throughfall and stemflow, *Front. Plant. Sci.*, 1, 1–6,  
893 <https://doi.org/10.3389/ffgc.2018.00007>, 2018.

894 Uijlenhoet, R. and Sempere Torres, D.: Measurement and parameterization of rainfall  
895 microstructure, *J. Hydrol.*, 328, 1, 1–7, <https://doi.org/10.1016/j.jhydrol.2005.11.038>,  
896 2006.

897 [Vanvan](#) Stan, J.T. and Levia, D.F.: Inter- and intraspecific variation of stemflow production  
898 from *Fagus grandifolia* Ehrh. (American beech) and *Liriodendron tulipifera* L.  
899 (yellow poplar) in relation to bark microrelief in the eastern United States,  
900 *Ecohydrology*, 3, 11–19, <https://doi.org/10.1002/eco.83>, 2010.

- 
- 901 ~~Vanvan~~ Stan, J.T., Siegert, C.M., Levia D.F. and Scheick, C.E.: Effects of wind-driven  
902 rainfall on stemflow generation between codominant tree species with differing  
903 crown characteristics, *Agric. For. Meteorol.*, 151, 9, 1277–1286,  
904 <https://doi.org/10.1016/j.agrformet.2011.05.008>, 2011.
- 905 ~~Vanvan~~ Stan, J.T., Gay, T.E. and Lewis, E.S.: Use of multiple correspondence analysis  
906 (MCA) to identify interactive meteorological conditions affecting relative throughfall,  
907 *J. Hydrol.*, 533, 452–460, <https://doi.org/10.1016/j.jhydrol.2015.12.039>, 2016.
- 908 Wang, X.P., Wang, Z.N., Berndtsson, R., Zhang, Y.F. and Pan, Y.X.: Desert shrub stemflow  
909 and its significance in soil moisture replenishment, *Hydrol. Earth Syst. Sci.*, 15, 561–  
910 567, <https://doi.org/10.5194/hess-15-561-2011>, 2011.
- 911 ~~Wang, X.P., Zhang, Y.F., Wang, Z.N., Pan, Y.X., Hu, R., Li, X.J. and Zhang, H.: Influence~~  
912 ~~of shrub canopy morphology and rainfall characteristics on stemflow within a~~  
913 ~~revegetated sand dune in the Tengger Desert, NW China, *Hydrol. Process.*, 27, 1501–~~  
914 ~~1509, <https://doi.org/10.1002/hyp.9767>, 2013.~~
- 915 Yang, Z.P.: Rainfall partitioning process and its effects on soil hydrological processes for  
916 sand-fixed shrubs in Mu us sandland, Northwest China. PhD Thesis. Beijing Normal  
917 University, Beijing, 123 pp (in Chinese with English abstract), 2010.
- 918 Yang, X.L., Shao, M.A. and Wei, X.H.: Stemflow production differ significantly among  
919 tree and shrub species on the Chinese Loess Plateau, *J. Hydrol.*, 568, 427–436,  
920 <https://doi.org/10.1016/j.jhydrol.2018.11.008>, 2019.
- 921 Yuan, C., Gao, G.Y. and Fu, B.J.: Stemflow of a xerophytic shrub (*Salix psammophila*) in  
922 northern China: Implication for beneficial branch architecture to produce stemflow, *J.*

---

923 Hydrol., 539, 577–588, <https://doi.org/10.1016/j.jhydrol.2016.05.055>, 2016.

924 Yuan, C., Gao, G.Y. and Fu, B.J.: Comparisons of stemflow and its bio-/abiotic influential  
925 factors between two xerophytic shrub species, Hydrol. Earth Syst. Sci., 21, 1421–1438,  
926 <https://doi.org/10.5194/hess-21-1421-2017>, 2017.

927 Zabret, K., Rakovec, J. and Šraj, M.: Influence of meteorological variables on rainfall  
928 partitioning for deciduous and coniferous tree species in urban area, J. Hydrol., 558,  
929 29–41, <https://doi.org/10.1016/j.jhydrol.2018.01.025>, 2018.

930 [Zhang, Y., Li, X.Y., Li, W., Wu, X.C., Shi, F.Z., Fang, W.W. and Pei, T.T.: Modeling rainfall](#)  
931 [interception loss by two xerophytic shrubs in the Loess Plateau, Hydrol. Process., 31,](#)  
932 [1926–1937, https://doi.org/10.1002/hyp.11157, 2017.](#)

933 Zhang, Y.F., Wang X.P., Hu, R., Pan Y.X. and Paradeloc, M.: Rainfall partitioning into  
934 throughfall, stemflow and interception loss by two xerophytic shrubs within a rain-fed  
935 re-vegetated desert ecosystem, northwestern China, J. Hydrol., 527, 1084–1095,  
936 <https://doi.org/10.1016/j.jhydrol.2015.05.060>, 2015.



937 **Table 1.** Branch morphologies of *C. korshinskii* and *S. psammophila* for stemflow recording.

| Shrub species         | BD categories (mm) | Amount | BD (mm) | BL (cm) | BA (°) | LA (cm <sup>2</sup> ) |
|-----------------------|--------------------|--------|---------|---------|--------|-----------------------|
| <i>C. korshinskii</i> | 5–10               | 2      | 6.6     | 131     | 61     | 837.1                 |
|                       | 10–15              | 2      | 13.1    | 168     | 43     | 2577.3                |
|                       | 15–18              | 2      | 17.8    | 206     | 72     | 4243.1                |
|                       | 18–25              | 1      | 22.1    | 242     | 50     | 6394.7                |
|                       | >25                | NA     | NA      | NA      | NA     | NA                    |
| <i>S. psammophila</i> | 5–10               | 2      | 7.5     | 248     | 69     | 626.3                 |
|                       | 10–15              | 2      | 13.2    | 343     | 80     | 1683.5                |
|                       | 15–18              | NA     | NA      | NA      | NA     | NA                    |
|                       | 18–25              | 2      | 21.8    | 286     | 76     | 3468.3                |
|                       | >25                | 1      | 31.3    | 356     | 60     | 7513.7                |

938 Notes: BD, BL and BA are branch basal diameter, length and inclination angle, respectively; LA is leaf

939 area of individual branches; NA means not applicable.

940 **Table 2.** Rainfall characteristics during events with different intensity peak amounts.

| Indicators                               | Event A        | Event B        | Event C        | Others        | Average          |
|------------------------------------------|----------------|----------------|----------------|---------------|------------------|
| <u>Event amount</u>                      | <u>17</u>      | <u>11</u>      | <u>15</u>      | <u>11</u>     | <u>13.5±1.5</u>  |
| RA (mm)                                  | 4.1 <u>ab</u>  | 5.2 <u>b</u>   | 11.7 <u>c</u>  | 0.6 <u>a</u>  | 5.4 ± 0.9        |
| RD (h)                                   | 2.5 <u>a</u>   | 3.6 <u>a</u>   | 10.3 <u>b</u>  | 2.2 <u>a</u>  | 4.7 ± 0.8        |
| RI (h)                                   | 48.5 <u>ab</u> | 70.5 <u>b</u>  | 57.3 <u>ab</u> | 26.1 <u>a</u> | 50.6 ± 6.1       |
| I (mm·h <sup>-1</sup> )                  | 5.6 <u>a</u>   | 5.5 <u>a</u>   | 4.6 <u>a</u>   | 2.2 <u>b</u>  | 4.5 ± 1.0        |
| I <sub>10</sub> (mm·h <sup>-1</sup> )    | 15.5 <u>a</u>  | 12.7 <u>ab</u> | 9.5 <u>b</u>   | 6.0 <u>c</u>  | 10.9 ± 2.1       |
| I <sub>b10</sub> (mm·h <sup>-1</sup> )   | 7.7 <u>a</u>   | 9.9 <u>a</u>   | 2.8 <u>b</u>   | 1.6 <u>b</u>  | 5.5 ± 1.4        |
| I <sub>e10</sub> (mm·h <sup>-1</sup> )   | 4.3 <u>a</u>   | 3.6 <u>a</u>   | 2.1 <u>ab</u>  | 1.2 <u>b</u>  | 2.8 ± 0.7        |
| F (mg·m·s <sup>-1</sup> )                | 17.1 <u>a</u>  | 17.6 <u>a</u>  | 17.2 <u>a</u>  | 12.5 <u>b</u> | 16.1 ± 1.2       |
| F <sub>10</sub> (mg·m·s <sup>-1</sup> )  | 27.8 <u>a</u>  | 26.6 <u>a</u>  | 24.2 <u>ab</u> | 21.0 <u>b</u> | 24.9 ± 1.4       |
| F <sub>b10</sub> (mg·m·s <sup>-1</sup> ) | 19.7 <u>ab</u> | 21.7 <u>a</u>  | 15.4 <u>b</u>  | 16.9 <u>b</u> | 18.4 ± 1.4       |
| F <sub>e10</sub> (mg·m·s <sup>-1</sup> ) | 17.3 <u>a</u>  | 16.6 <u>a</u>  | 13.4 <u>b</u>  | 16.8 <u>a</u> | 16.0 ± 1.0       |
| <u>E (unitless)</u>                      | <u>0.9 ab</u>  | <u>1.0 ab</u>  | <u>0.4 a</u>   | <u>1.7 b</u>  | <u>0.9 ± 0.2</u> |

941 Note: Event A, Event B and Event C are events with the single, double and multiple rainfall intensity  
942 peaks, respectively, ~~and~~; Others are the events that excluded from the categorization; ~~RA is the rainfall~~  
943 ~~amount~~; RD and RI are rainfall amount, duration and interval, respectively; I and I<sub>10</sub> are the average and  
944 10-min maximum rainfall ~~intensity~~intensities, respectively; I<sub>b10</sub> and I<sub>e10</sub> are the average rainfall  
945 ~~intensity~~intensities in 10 min after rain ~~beginning~~begins and before rain ~~ending~~ends, respectively; F and  
946 F<sub>10</sub> are the average and 10-min maximum raindrop ~~momentum~~momentums, respectively; F<sub>b10</sub> and F<sub>e10</sub>  
947 are the average raindrop ~~momentum~~momentums in 10 min after rain ~~beginning~~begins and before rain  
948 ~~ending~~ends, respectively; E is evaporation coefficient; Different letters indicate significant differences  
949 of rainfall characteristics between event categories (p<0.05) (rows at the table).

950 **Table 3.** Stemflow variables of *C. korshinskii* and *S. psammophila* during rainfall events  
 951 with different intensity peak amounts.

| Species               | Stemflow                                | Event A          | Event B           | Event C           | Others          | Average              |
|-----------------------|-----------------------------------------|------------------|-------------------|-------------------|-----------------|----------------------|
| <i>C. korshinskii</i> | SFV (mL)                                | <u>934134.1</u>  | <u>15525203.</u>  | <u>37197560.</u>  | <u>6737.6</u>   | <u>1658226.6 ±</u>   |
|                       | SFI (mm·h <sup>-1</sup> )               | <u>5.7672.9</u>  | <u>6.0552.4 b</u> | <u>5.1527.0 b</u> | <u>1.9317.8</u> | <u>4.7 ± 1517.5</u>  |
|                       | SFI <sub>10</sub> (mm·h <sup>-1</sup> ) | <u>30.22849.</u> | <u>26.42399.3</u> | <u>15.31809.1</u> | <u>9.11173.</u> | <u>20.3 ±</u>        |
|                       | <u>FR (unitless)</u>                    | <u>109.4 a</u>   | <u>146.6 b</u>    | <u>137.9 b</u>    | <u>128.9 ab</u> | <u>130.7 ± 8.2</u>   |
|                       | TLG (min)                               | 67.3 <u>ab</u>   | 56.2 <u>a</u>     | 67.0 <u>ab</u>    | 74.2 <u>b</u>   | 66.2 ± 10.6          |
|                       | <u>TLM (min)</u>                        | <u>81.1 a</u>    | <u>75.5 a</u>     | <u>202.1 b</u>    | <u>78.8 a</u>   | <u>109.4 ± 20.5</u>  |
|                       | TLE (min)                               | 22.3 <u>a</u>    | 18.7 <u>b</u>     | 18.5 <u>b</u>     | 20.6 <u>a</u>   | 20.0 ± 5.3           |
|                       | <u>TLM (min)</u>                        | <u>81.1</u>      | <u>75.5</u>       | <u>202.1</u>      | <u>78.8</u>     | <u>109.4 ± 20.5</u>  |
|                       | SFD (h)                                 | 1.4 <u>a</u>     | 3.1 <u>a</u>      | 9.1 <u>b</u>      | 1.4 <u>a</u>    | 3.8 ± 0.8            |
| <i>S. psammophila</i> | SFV (mL)                                | <u>6165102.</u>  | <u>9070145.7</u>  | <u>24690435.</u>  | <u>634.7 c</u>  | <u>1014.0 ±</u>      |
|                       | SFI (mm·h <sup>-1</sup> )               | <u>7.2648.1</u>  | <u>6.0421.5 b</u> | <u>2.4246.6 c</u> | <u>3.4153.2</u> | <u>4.8 ± 367.3 ±</u> |
|                       | SFI <sub>10</sub> (mm·h <sup>-1</sup> ) | <u>24.81672.</u> | <u>24.51582.8</u> | <u>8.8888.4 b</u> | <u>9.4384.7</u> | <u>16.9 ±</u>        |
|                       | <u>FR (unitless)</u>                    | <u>77.1 a</u>    | <u>91.4 a</u>     | <u>129.1 b</u>    | <u>101.6 ab</u> | <u>101.6 ± 10.4</u>  |
|                       | TLG (min)                               | 84.9 <u>a</u>    | 46.5 <u>b</u>     | 56.1 <u>b</u>     | 31.5 <u>b</u>   | 54.8 ± 11.7          |
|                       | <u>TLE (min)</u>                        | <u>17.1</u>      | <u>8.6</u>        | <u>20.8</u>       | <u>7.3</u>      | <u>13.5 ± 17.2</u>   |
|                       | TLM (min)                               | 64.3 <u>a</u>    | 93.4 <u>a</u>     | 235.8 <u>b</u>    | 88.4 <u>a</u>   | 120.5 ± 22.1         |
|                       | <u>TLE (min)</u>                        | <u>17.1 a</u>    | <u>8.6 b</u>      | <u>20.8 a</u>     | <u>7.3 b</u>    | <u>13.5 ± 17.2</u>   |
|                       | SFD (h)                                 | 1.2 <u>a</u>     | 3.4 <u>a</u>      | 8.3 <u>b</u>      | 0.7 <u>a</u>    | 3.4 ± 0.9            |

952 Note: Event A, Event B and Event C are events with the single, double and multiple rainfall intensity  
 953 peaks, respectively, ~~and~~; Others are the events that excluded from the categorization; TLG and TLM are  
 954 ~~the~~ time lags of stemflow generating and maximizing ~~to~~ after rains begin ~~of rainfall~~, respectively; TLE is  
 955 ~~the~~ time lag of stemflow ending ~~to~~ cease of rainfall after rain ceases; SFD is ~~the~~ stemflow duration; SFV  
 956 is ~~the~~ stemflow volume; SFI ~~is~~ are the average stemflow intensities at incident rains, respectively;  
 957 Different letters indicate significant differences of stemflow variables between event categories (p<0.05)  
 958 (rows at the table).

959 **Table 4.** Comparisons of stemflow intensity,  $SFI_{10}$  and funnelling ratio at different basal  
 960 diameter categories.

| Species and stemflow variables |     | BD categories (mm) |             |             |             |             | AVG        |
|--------------------------------|-----|--------------------|-------------|-------------|-------------|-------------|------------|
|                                |     | 5–10               | 10–15       | 15–18       | 18–25       | >25         |            |
| <i>C. korshinskii</i>          | FR  | 163.7±12.2a        | 136±10.9b   | 119.5±13.0b | 97.7±9.2b   | NA          | 131±8.2    |
|                                | SFI | 716.2±118.7a       | 552.5±90.3b | 619±103.3b  | 333.8±45.8b | NA          | 553.9±82.1 |
| <i>S. psammophila</i>          | FR  | 212±17.4a          | 84±6.4b     | NA          | 44.2±3.0b   | 54.9±4.2b   | 100.6±7.9  |
|                                | SFI | 738.7±160.9a       | 360.7±82.7a | NA          | 197.2±44.9b | 209.9±44.5b | 372.2±79.4 |

961 Note: SFI and FR are the maximum average stemflow intensity in 10 min.

---

962 and funnelling ratio at incident rains, respectively; BD is branch basal diameter (mm); NA means not applicable;

963 Different letters indicate significant differences of stemflow variables between event categories ( $p < 0.05$ ) (rows

964 at the table).



965

966 **Figure 1.** Locations and experimental settings in the plots of *C. korshinskii* and *S.*

967 *psammophila*.

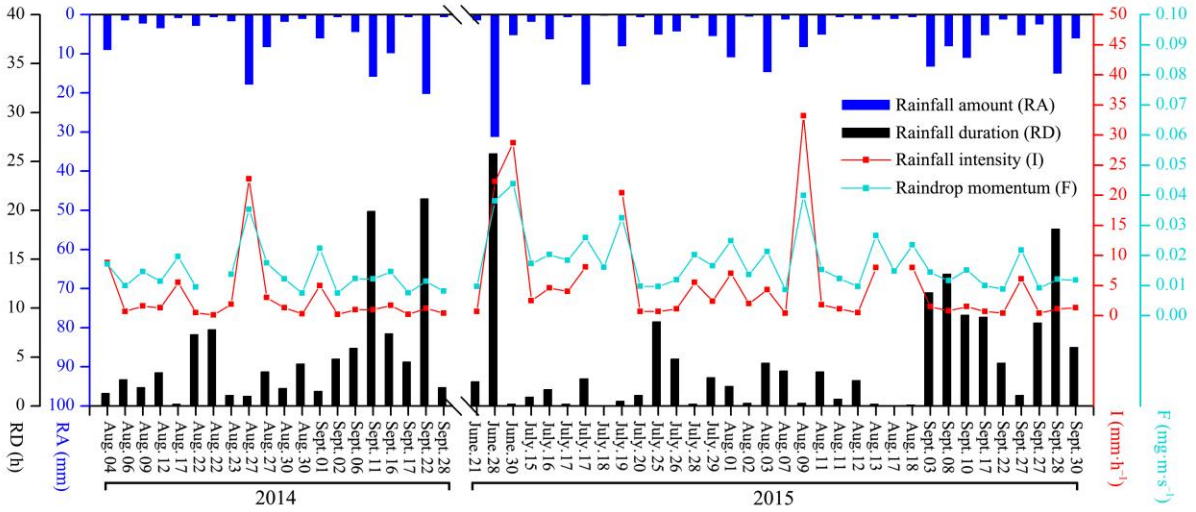

968

969

**Figure 2.** Inter-event variations in rainfall characteristics during the experimental period.-

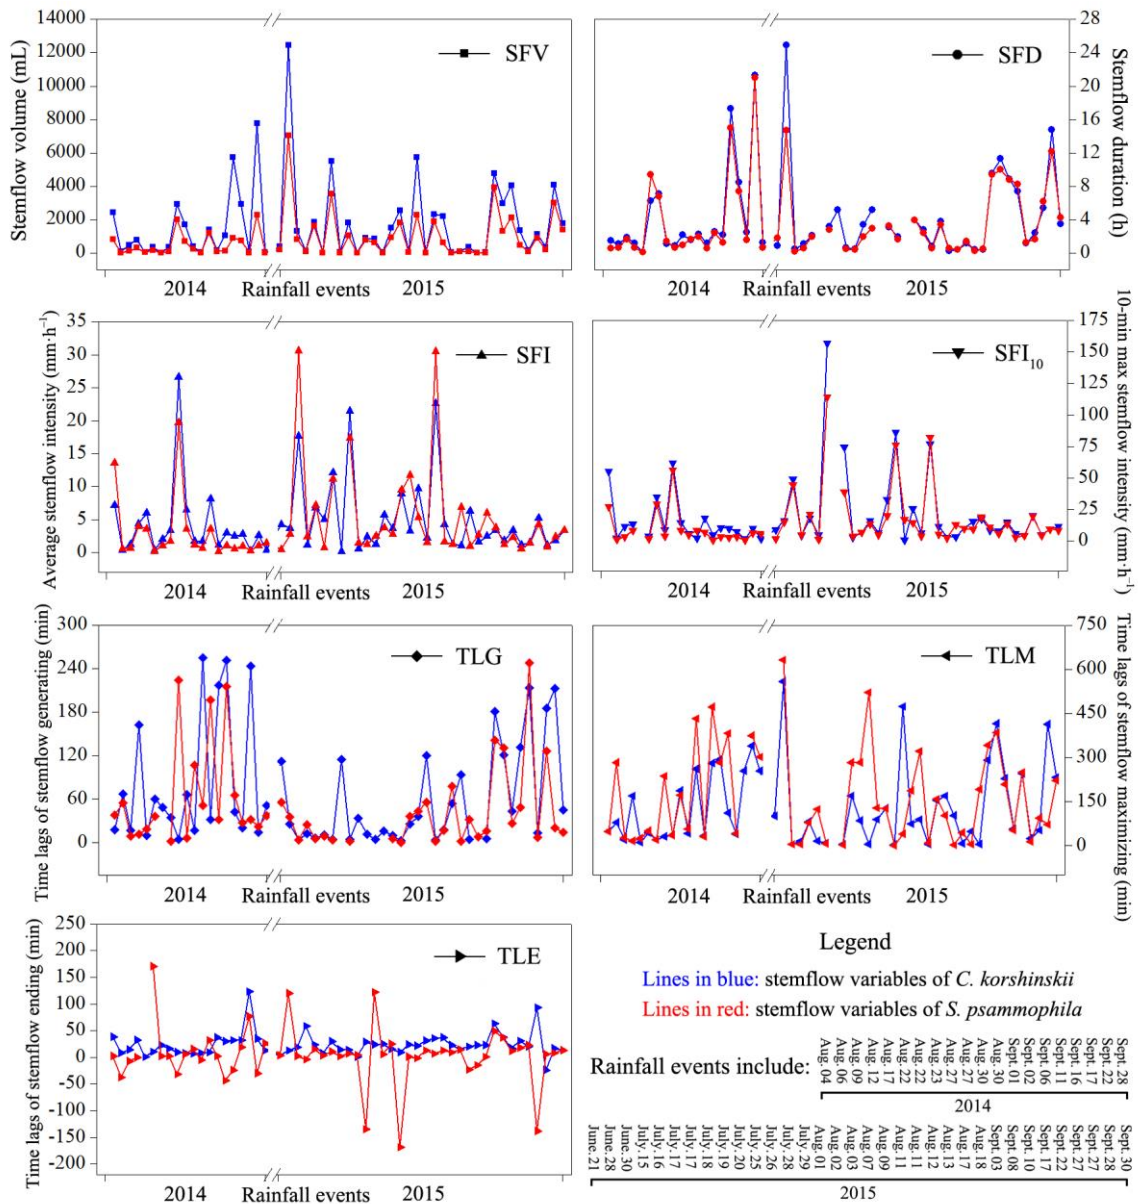



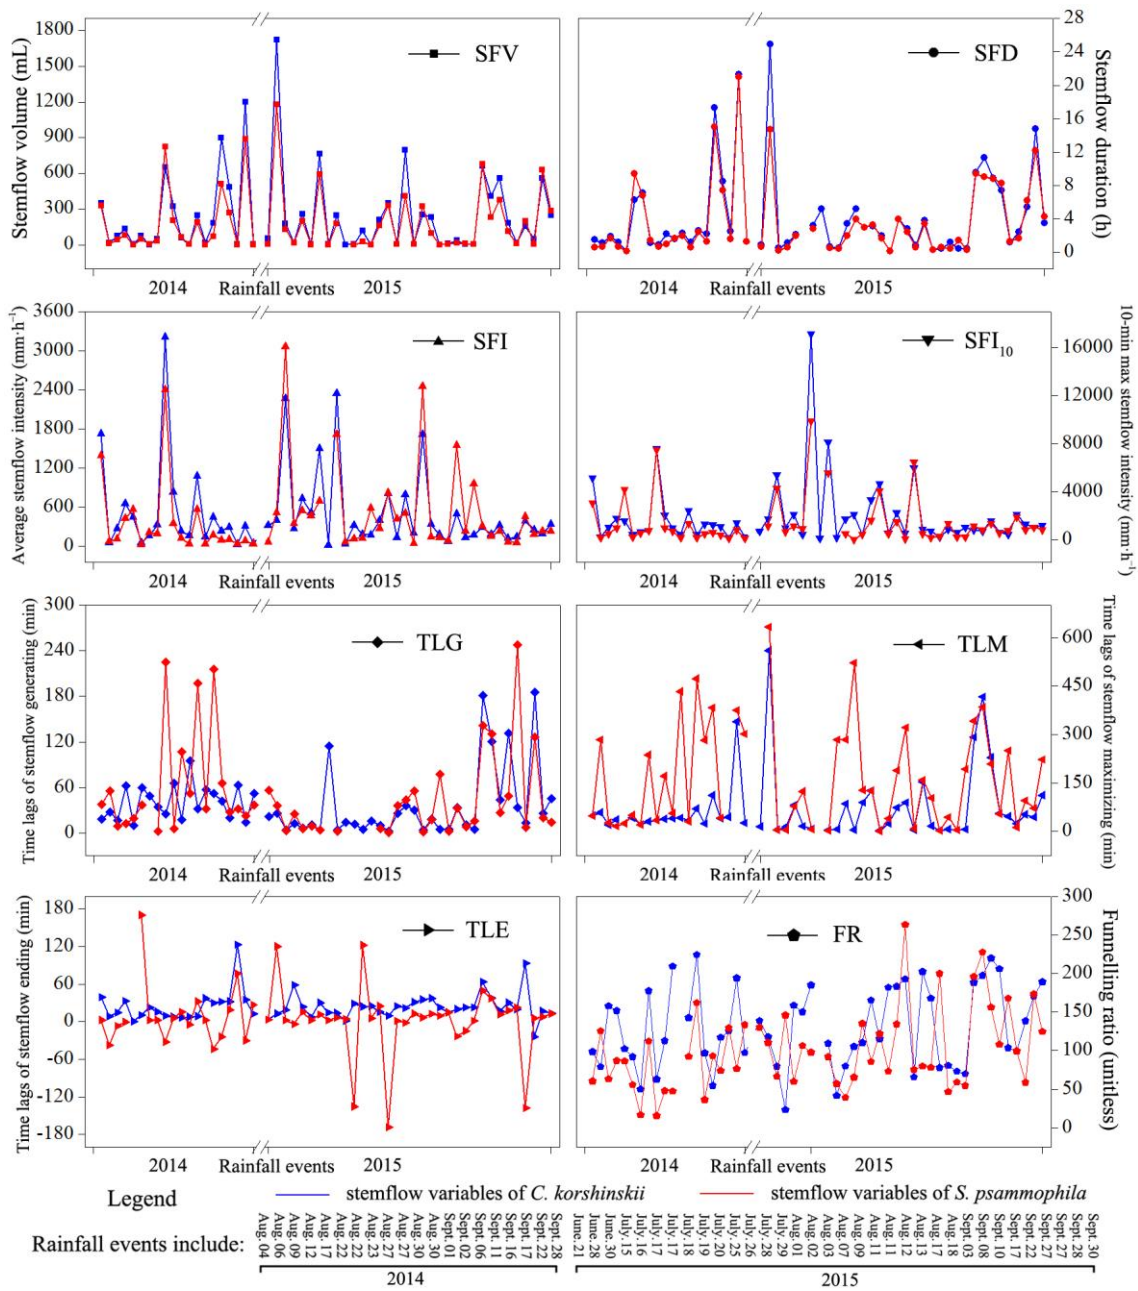

971

972 **Figure 3.** Inter-event variations in stemflow variables of *C. korshinskii* and *S. psammophila*

973 during the experimental period.-

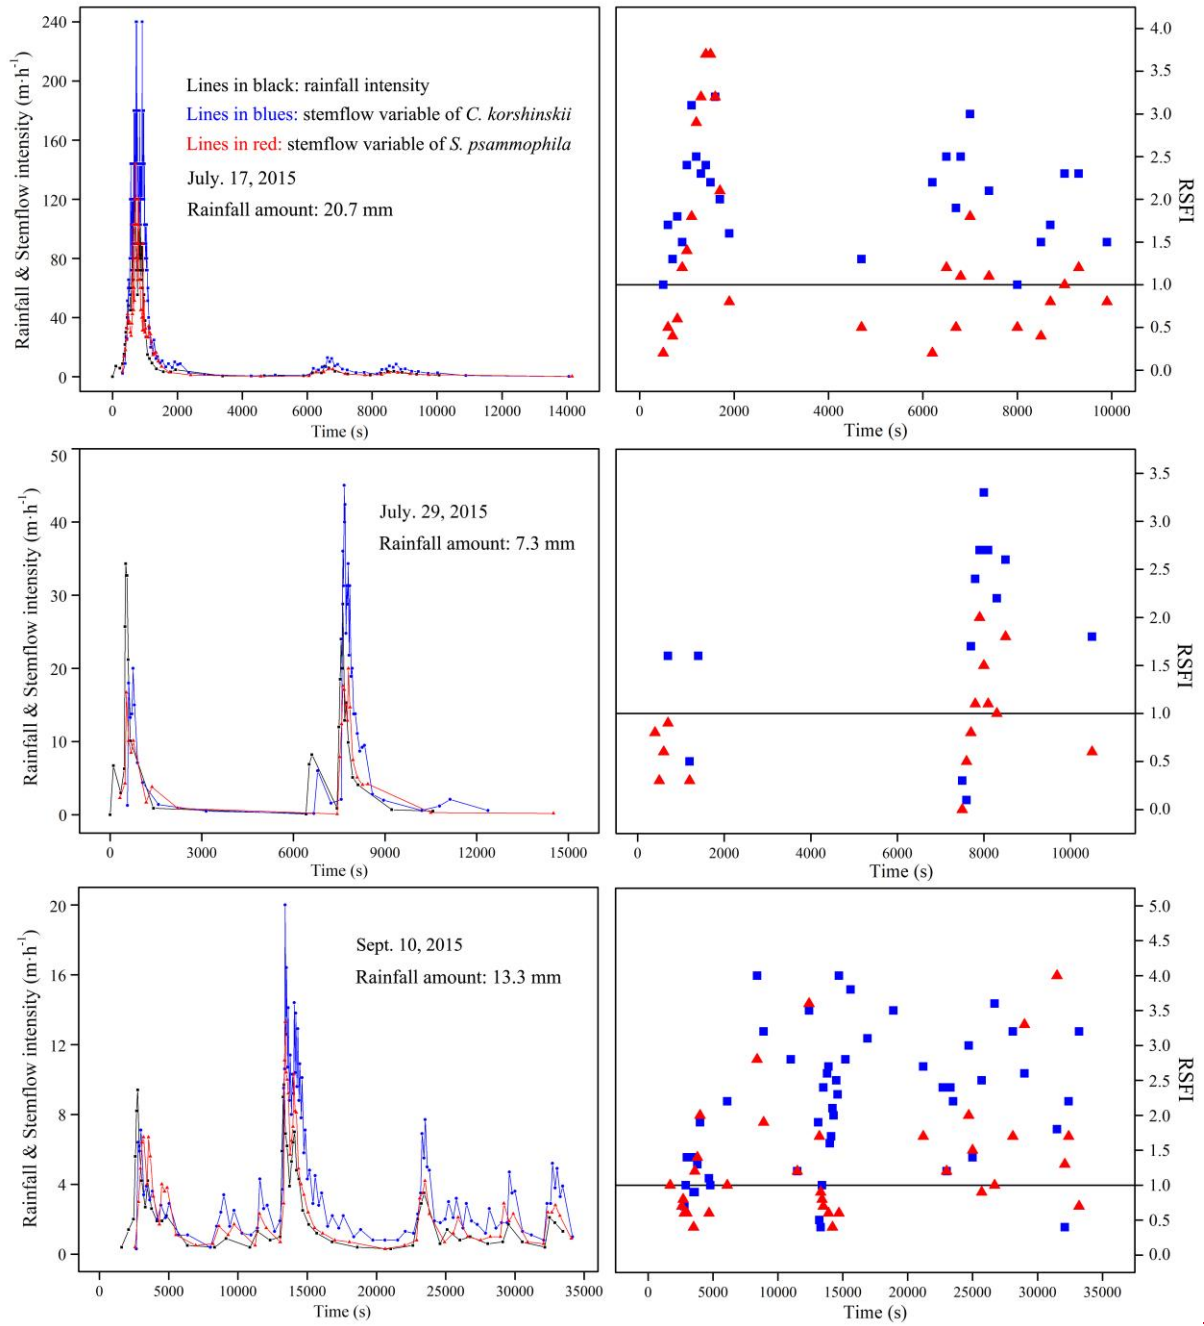

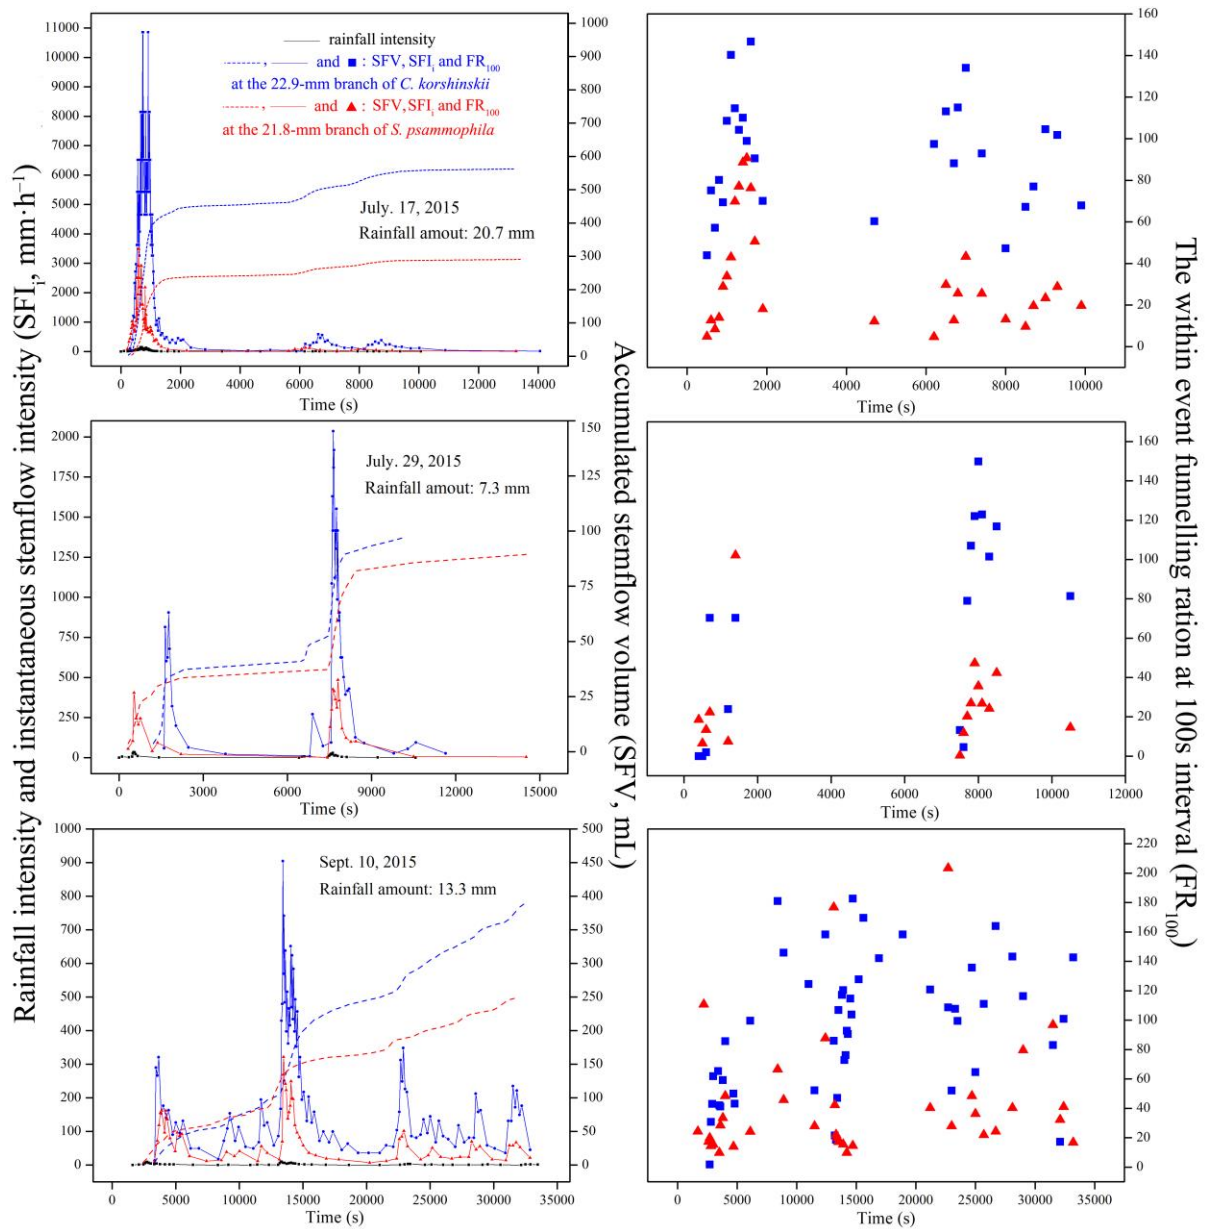

975

976 **Figure 4.** Stemflow synchronicity of *C. korshinskii* and *S. psammophila* to rains during

977 representative events with different rainfall-intensity ~~peaks.~~ peak amounts.

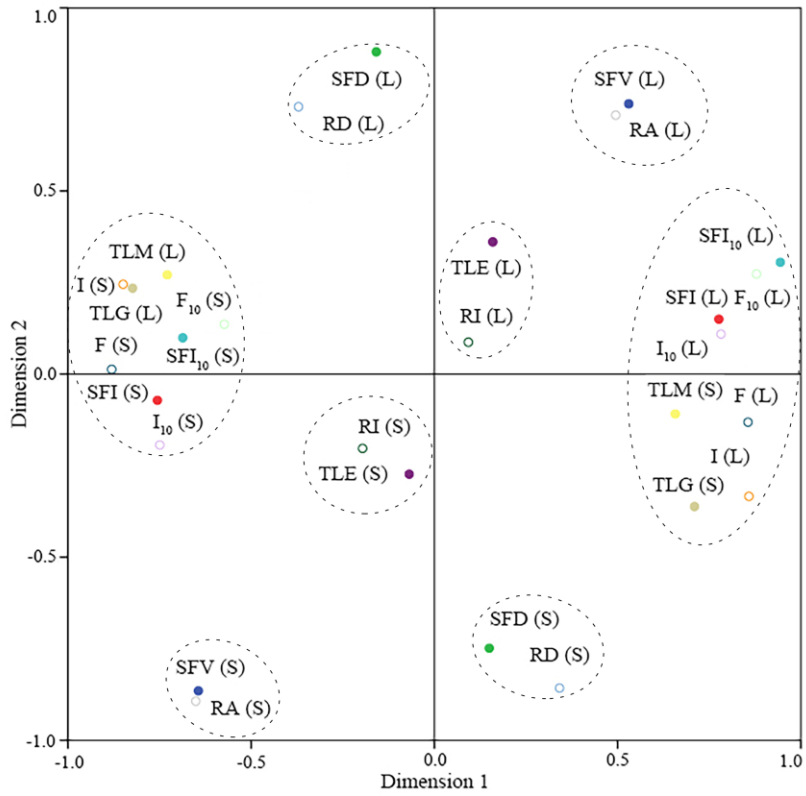

*C. korshinskii*

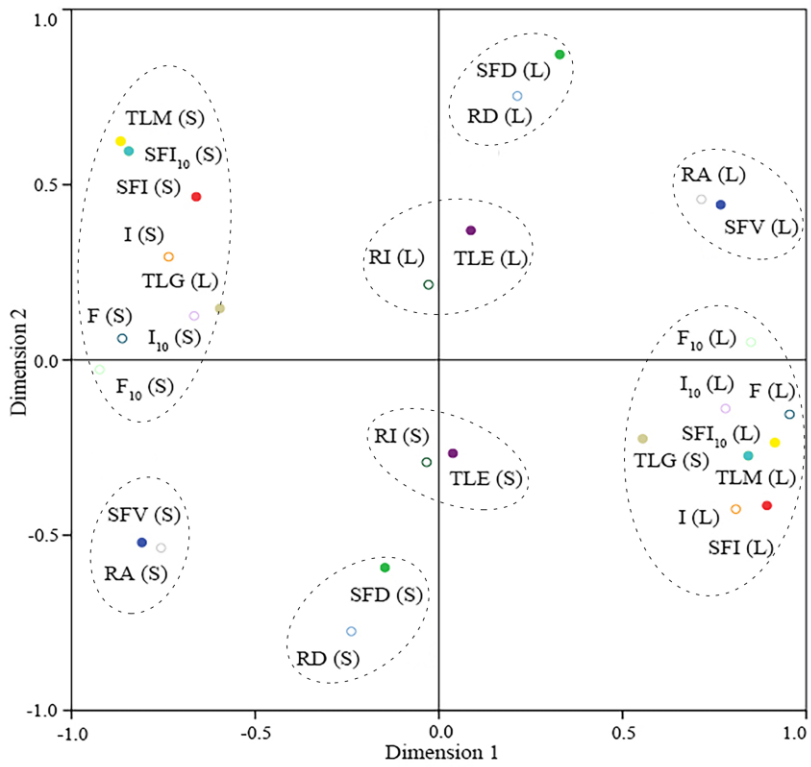

*S. psammophila*

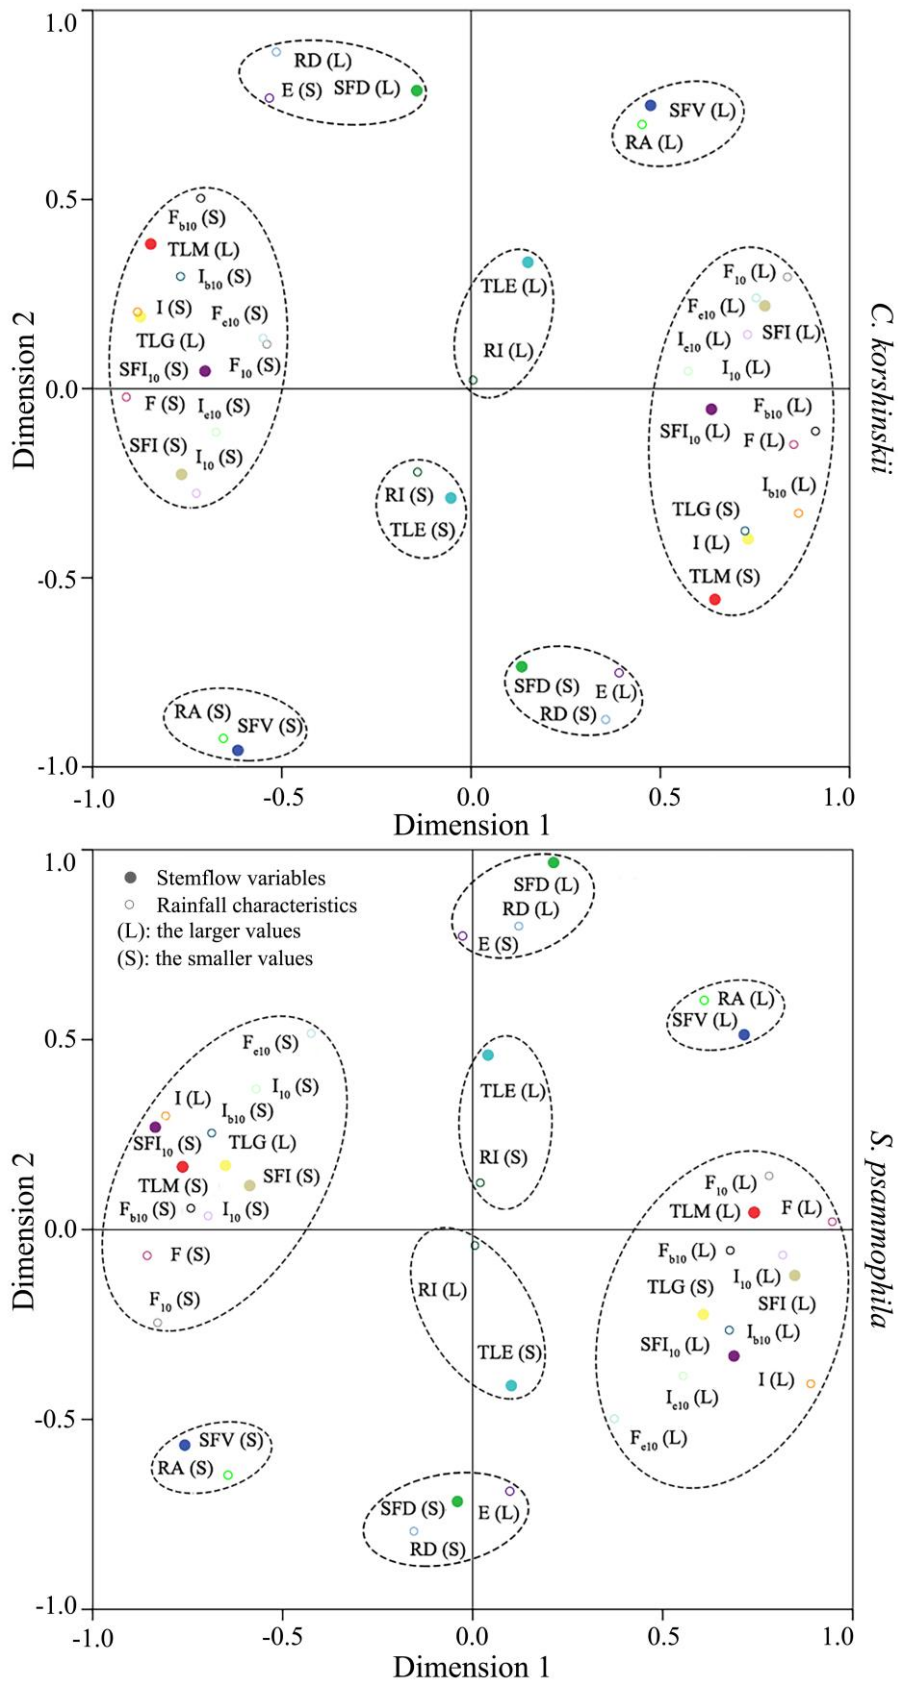

979

980 **Figure 5.** Correspondence maps of stemflow variables with rainfall characteristics for

981 *C. korshinskii* and *S. psammophila*.

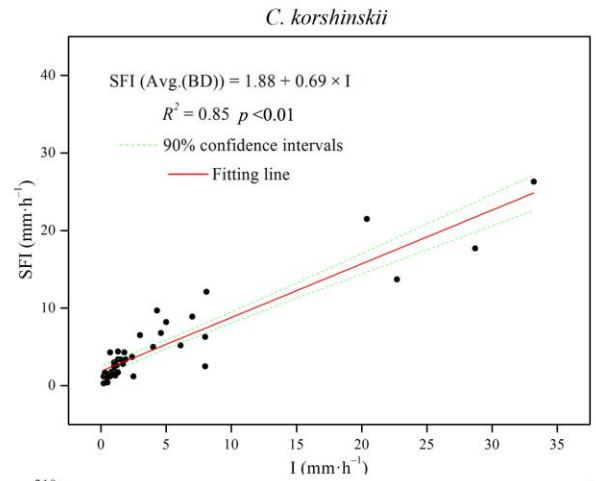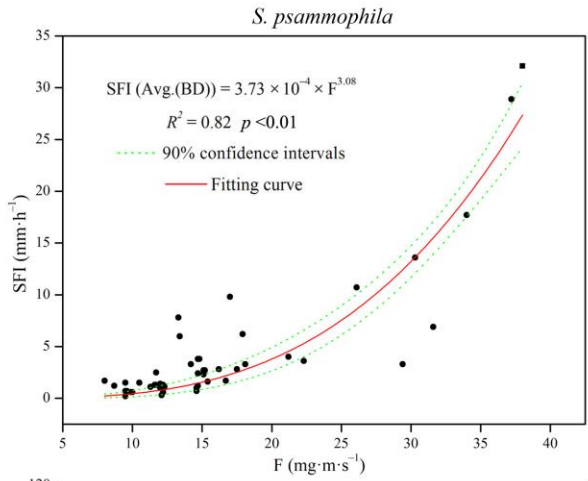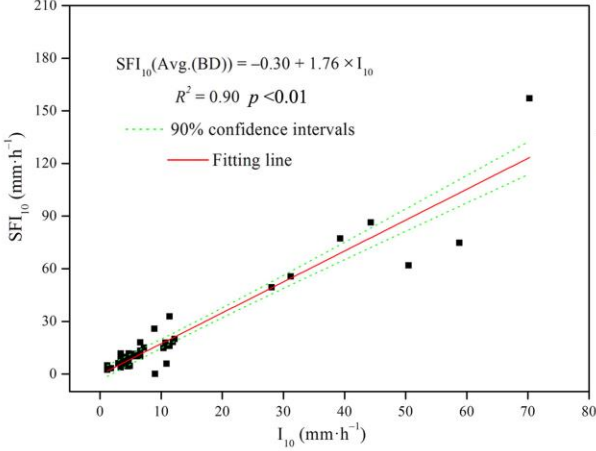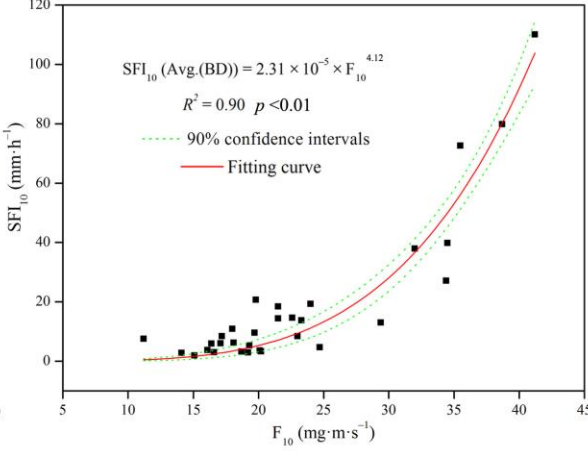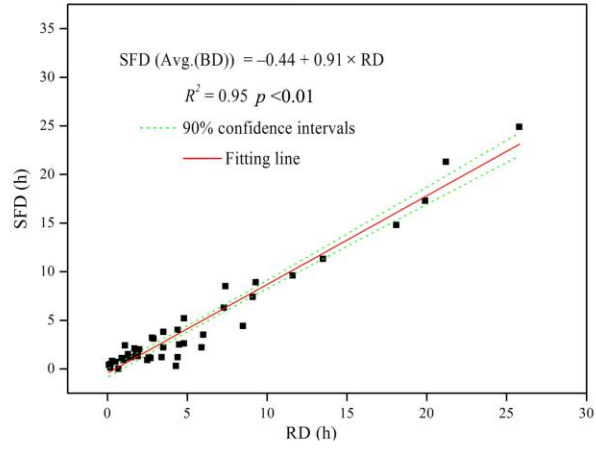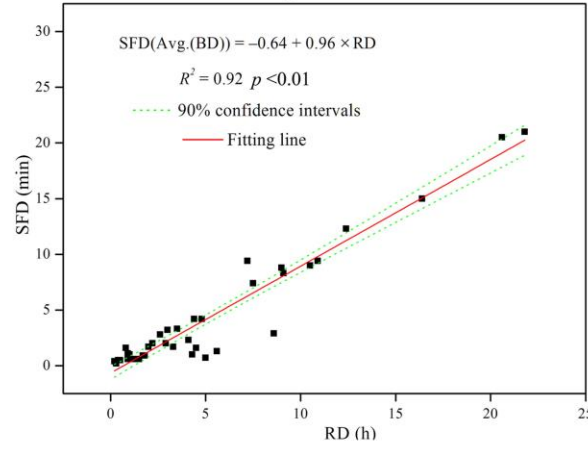

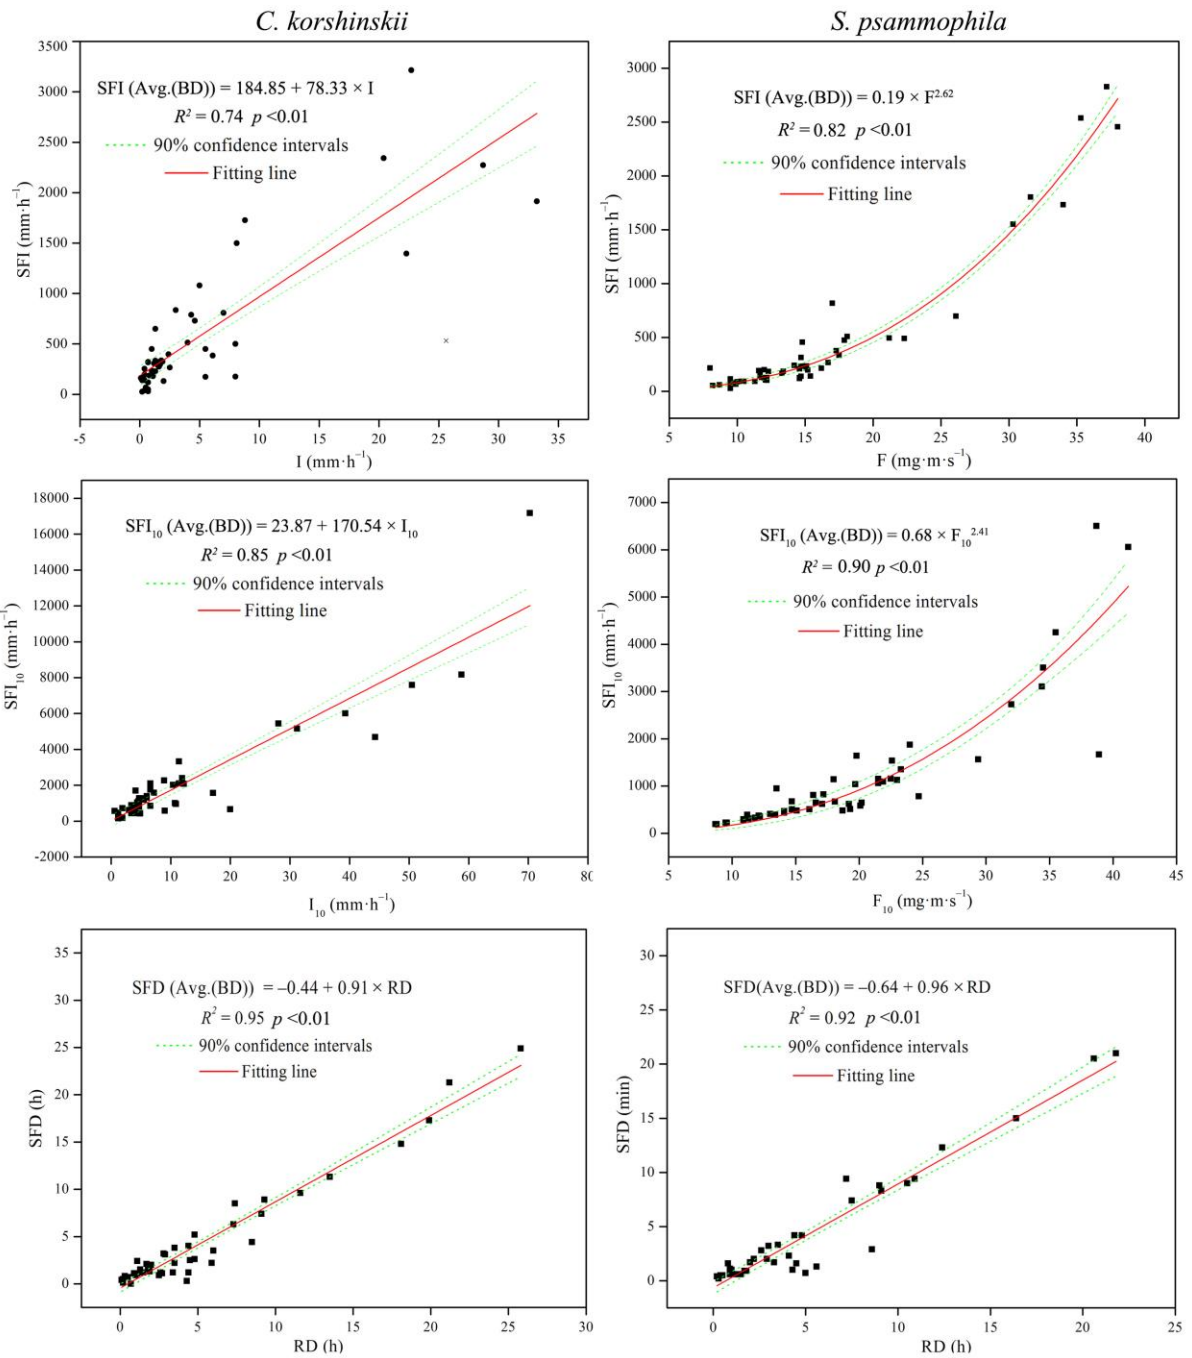

983

984 **Figure 6.** Relationships of stemflow intensity and duration with rainfall characteristics.-

*C. korshinskii*

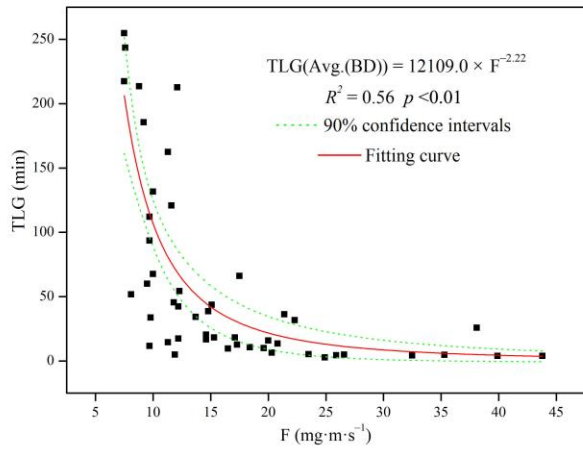

*S. psammophila*

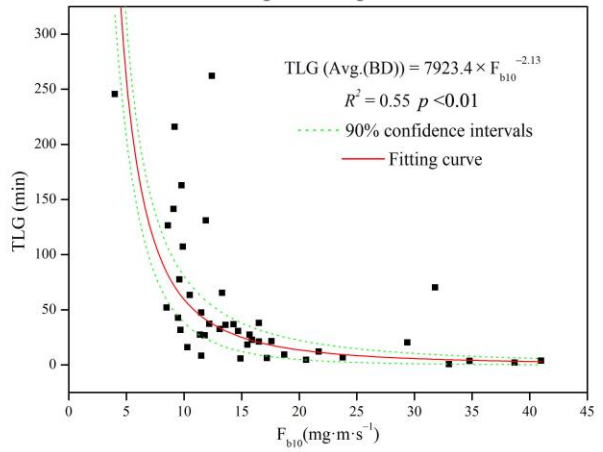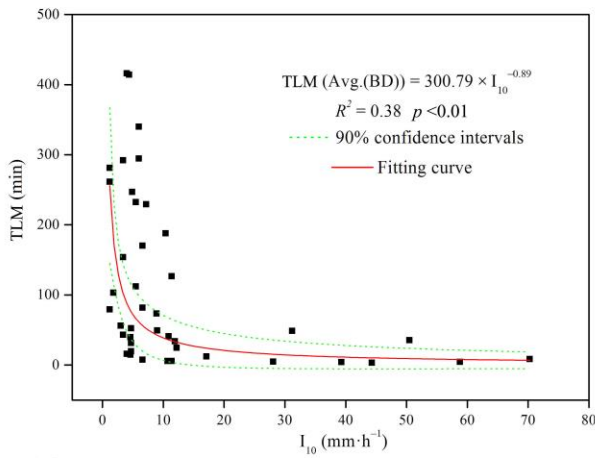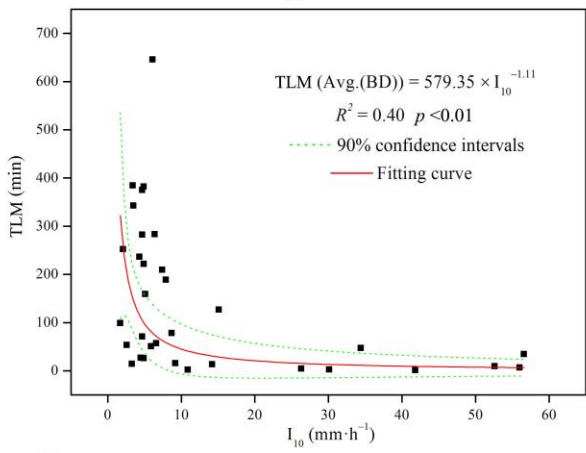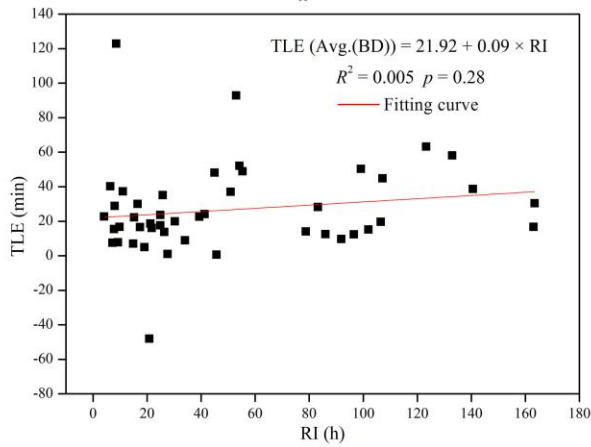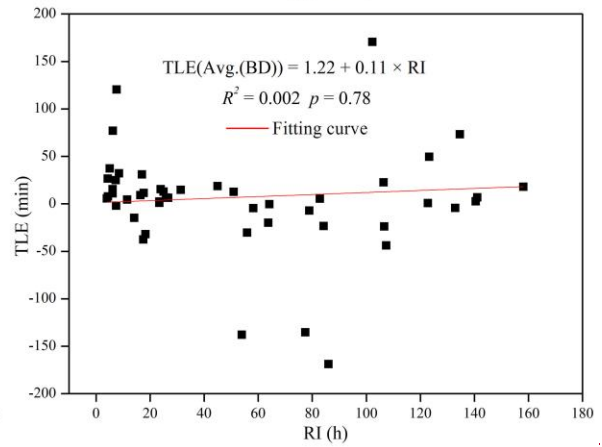



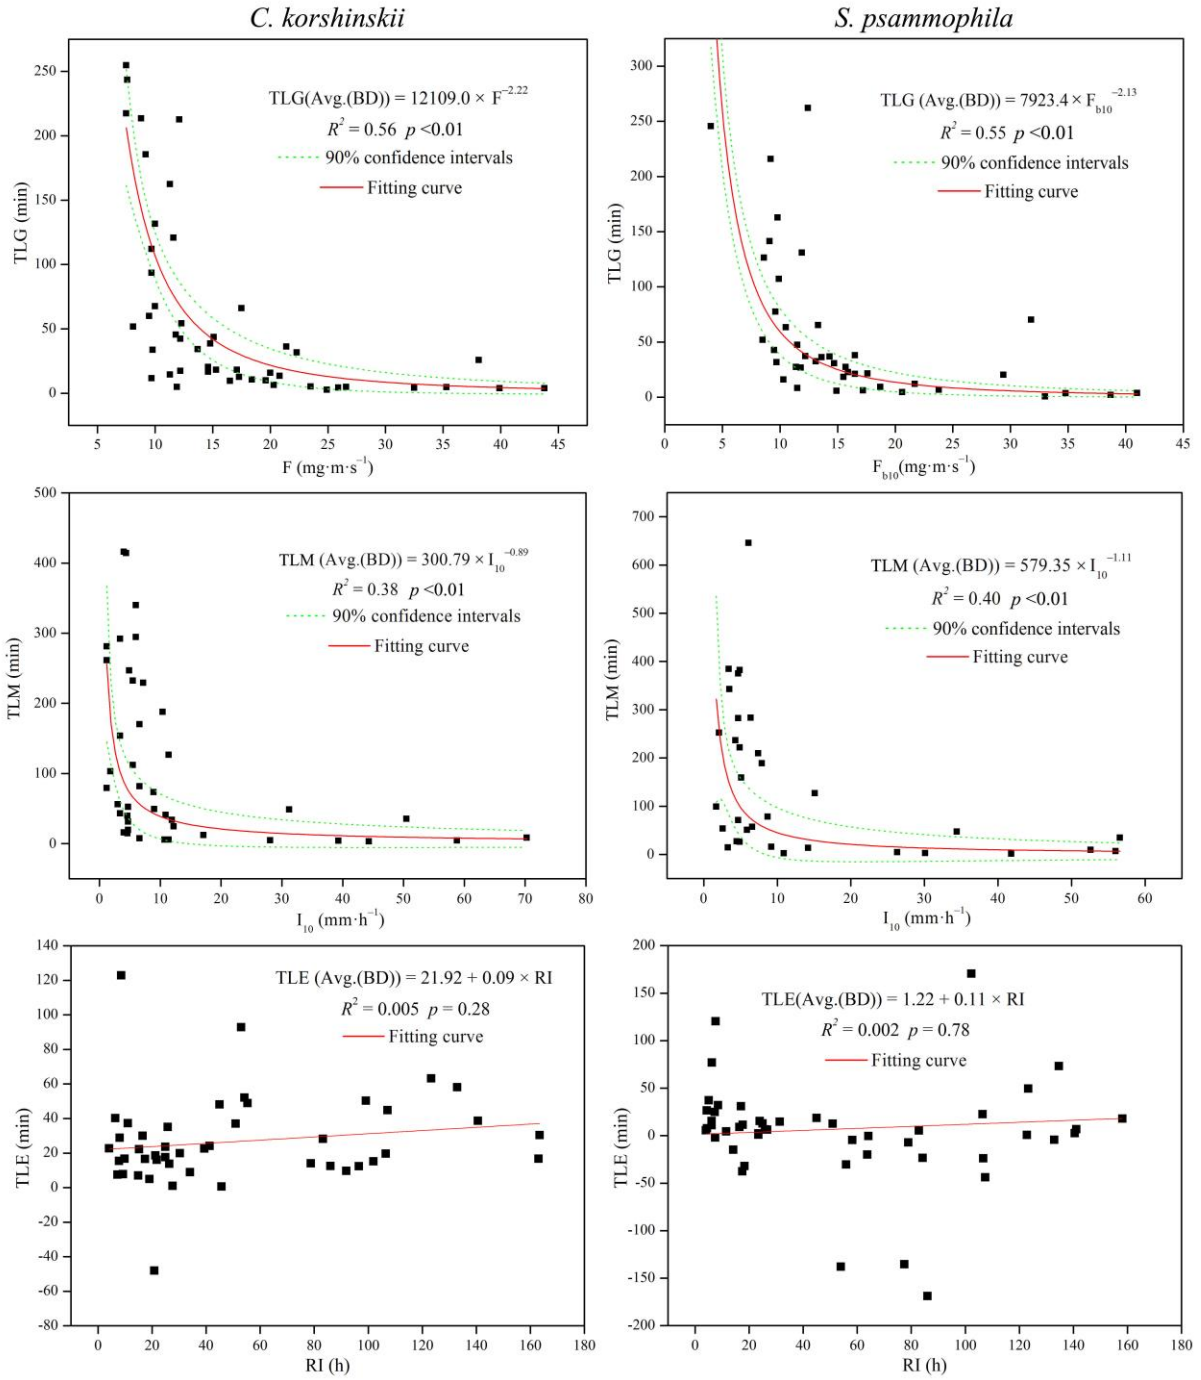

986

987 **Figure 7.** Relationships of stemflow time lags with rainfall characteristics.
